# Supplementary material for: Collagen fibers from chrome shavings for an ionic capacitive pressure sensor
Source: Royal Society of Chemistry journal article supplement (doi:10.1039/d4tc05343e), 2025-01-01
Supplement: d4tc05343e2.xlsx [file d4tc05343e2.xlsx]

## Sheet: Fig. 1c
Binding Energy (eV)	Intensity (a.u.)
	1:3	1:4	1:5	1:6
1350.08	94817.3	68232.6	74732.6	62438.7
1349.08	96210.9	67122	74902	60239
1348.08	93534.9	68265.8	73953.4	61815
1347.08	94330.4	67934.5	72366.2	61085
1346.08	93386.2	66460	72946.5	61921.5
1345.08	92757.3	65631.5	71549.9	60362.3
1344.08	92349.5	65591	73242.2	60267.4
1343.08	92406.4	65872.7	73174.6	61256.9
1342.08	91132.9	64051.1	72476.9	59984.1
1341.08	92606.4	66797.2	70972.6	59370
1340.08	90145.9	66387.1	72412.9	59864.8
1339.08	91686.4	66512.2	72172.8	59224.5
1338.08	91805.7	66017.3	69539.6	60125.8
1337.08	93125.8	65197.6	71438.8	57048.3
1336.08	90707.7	65616.4	70255.8	57673.1
1335.08	90039	64444.7	71023.2	57605.1
1334.08	91802.8	63686.9	70701.6	56590.7
1333.08	88741.3	65336.4	68690.7	58203.1
1332.08	88980.9	63259	70914.2	56575.8
1331.08	90924.4	64203	69824	55719.2
1330.08	89923.1	63687.1	70001.6	54854.2
1329.08	90481.8	63862.7	67774.7	57602.4
1328.08	88672.6	63730	69332.6	56823.9
1327.08	88922.2	63167.6	67527.2	57095.1
1326.08	91541.3	63416.3	69841.1	55901.1
1325.08	89126.8	62626.9	69616.6	56097.7
1324.08	89352.3	62331.7	71324.8	55846.4
1323.08	88739.2	63646	67507.5	55358.5
1322.08	88590.1	61894.5	66724.4	54925
1321.08	88564.4	62271.1	69349.6	54890.6
1320.08	89652.8	61339.4	68185.6	55223.2
1319.08	88754.8	61135.7	68497	53954.9
1318.08	88811.7	63484.5	69296.1	55552.5
1317.08	89807.7	61002	66946	54443.2
1316.08	89076.7	60896.3	67289.7	55677.5
1315.08	88215.8	61418.6	66906.2	53674.1
1314.08	88156.5	61259.1	67878.1	54828.3
1313.08	88862.5	61928.5	67300.8	54719.9
1312.08	87589.6	60153.4	67549.6	55131.5
1311.08	89033.8	61815.2	66770	53938.9
1310.08	89379.8	62622	66968.5	53988
1309.08	89387.2	61400.1	68704.3	53476.4
1308.08	89460.9	63180	65244.9	54224
1307.08	88022.5	59979.8	66854	54743.3
1306.08	88239.4	60750.4	67701.8	54301.6
1305.08	89824.6	61071.3	67175.8	56036.1
1304.08	87995	59530.9	67249.1	53905.8
1303.08	87748.6	60628.6	67953.1	53857.8
1302.08	89875.2	60650	65745.5	54627.9
1301.08	87467	60527.4	66942.1	54484.9
1300.08	89809.5	59812.8	66032.3	54394
1299.08	88741.4	59581	65582.5	53200.4
1298.08	89226.5	60804.8	68027.5	52892.6
1297.08	89614.3	60291.2	67292.3	53303.9
1296.08	89545.2	61241.4	66544.4	53593.7
1295.08	88329.1	62684.2	68973.2	53679.3
1294.08	89898.9	60916.1	67762.4	53022.5
1293.08	87390.3	61626.2	66000.9	52567.5
1292.08	89077.2	61404.3	67327	54223.7
1291.08	89662.2	61190.8	68443.5	53830
1290.08	90387.3	60848.7	68330	52644.4
1289.08	89548.1	60523.4	67011	53083.3
1288.08	89362.4	61202.2	66712.9	52642.7
1287.08	88245.5	60150.5	67180.5	54644.7
1286.08	89270.9	61963.3	67773.3	53916.9
1285.08	88317	60704.3	67434.3	54885.9
1284.08	88595.2	61183.2	66995.3	54587
1283.08	90663.2	59883.6	66516.1	53457.2
1282.08	89972.2	60984.6	67085.3	54396.9
1281.08	90166.5	60749.5	67453.1	53621.7
1280.08	91608.8	59443.8	67843.6	53126.4
1279.08	90312.6	59787	68254	54240.2
1278.08	91473.6	61781.6	67850.8	54673.8
1277.08	90010	61347.1	70512.9	55075.9
1276.08	90102.1	60518.6	67803.3	53457.1
1275.08	92031.9	61055.5	67891.3	54359
1274.08	90492	62850.5	68305.2	54563.3
1273.08	90164.6	62926.7	68208.8	52393.3
1272.08	90441.1	61756.7	69160.9	53050.4
1271.08	92936.9	62134.2	70167.5	54603.9
1270.08	92598.1	61002	67502.9	52982.2
1269.08	92384.8	61425.9	67790.1	55527.2
1268.08	93458.7	61650.7	68894	54456.5
1267.08	92423.8	61994.8	69203.4	54194.5
1266.08	92411.1	62643.2	68121.9	53868.1
1265.08	91964.1	63178.7	68779.9	54745
1264.08	92163.3	62079.3	69143.1	53976.8
1263.08	93561.6	62678.7	69551.5	54050
1262.08	91310.3	60642	69284.5	53099.3
1261.08	94097.1	61766.3	69751	55558.5
1260.08	94231.4	61199.6	68692.5	55233.9
1259.08	93071	60815.8	69229.4	55127.1
1258.08	93793.1	64298.9	69352.1	54646.6
1257.08	92268.5	62452.9	68432.1	54772.5
1256.08	93308.8	61114.8	70355.4	55305.2
1255.08	92642.1	62016.7	70149.2	54608.5
1254.08	95248.5	62935.7	68466.4	54919.3
1253.08	94195.2	62251.1	68983	56390.6
1252.08	92673.8	63291.5	69249	54183.2
1251.08	93936.2	63823.7	69050.7	56218.3
1250.08	95497.8	62003.4	71065.9	55279.8
1249.08	95538.2	62468.2	71686.6	56345.2
1248.08	96610	64263.3	71977.6	56486.2
1247.08	98467.7	63579.3	72764.7	56700.1
1246.08	96304.2	63254.4	73474.4	57297.3
1245.08	96407.9	65858.8	71569.3	56119.9
1244.08	98919.1	66220.8	73884.4	57500.1
1243.08	97590	65205.2	71919.3	56106.3
1242.08	97465.5	64395.3	72555.7	56693.7
1241.08	98647	64271.3	71883.2	57588.7
1240.08	98174	65438.6	72284.7	57533.1
1239.08	98469.3	63992.3	71802.3	58673.6
1238.08	99782.5	65858.3	74081.6	56750.3
1237.08	98424.3	65218.4	72342.9	55886.3
1236.08	96987.7	63658.5	71473.9	56736.3
1235.08	95576.3	63425	70469.8	56781.7
1234.08	95480.5	64619.7	71276	58588
1233.08	97217.7	65328.8	72536.9	57538.9
1232.08	97935.7	66453.4	71841.4	59203.6
1231.08	101210	67169.5	74385.3	58504.4
1230.08	101559	68055.7	74465.9	59696
1229.08	103948	68740.3	77532.3	61486.7
1228.08	104598	69455.8	77891.5	60625
1227.08	106319	70822.3	77808.5	60938.9
1226.08	105279	69660.8	77909.9	62419.3
1225.08	104465	69812.3	77973.4	61581.9
1224.08	103479	69553.9	77287.7	61027.4
1223.08	101888	69171	75048.1	61516
1222.08	99712.7	68933.3	74087.4	59935.3
1221.08	99324.4	66103.4	72857.7	59664.7
1220.08	98221.2	65979.2	71732.8	59189.4
1219.08	96850.5	63927.6	67450.8	56170.7
1218.08	92408.7	62466.4	67721.3	54519.9
1217.08	90949	60444.5	65670.6	52568.3
1216.08	86656.7	58901.3	64847.4	51250
1215.08	85947.8	56849	63533.8	50175.7
1214.08	86195.6	55350.5	62453.5	48738.8
1213.08	81073.2	54383.4	62507.6	47984.5
1212.08	82409.3	52841	61305.1	48057.1
1211.08	79734.6	53784.8	60541.3	47253.4
1210.08	79816.5	53408.3	59421.7	46295.3
1209.08	79779.8	50940.9	57735.7	46091
1208.08	79326.3	52212.9	59876.8	45857.5
1207.08	78383	52823.7	61186.2	46036.6
1206.08	78407.6	51932.7	59725.2	46946.9
1205.08	78942.2	51879.9	58719.7	46029.4
1204.08	79825.5	51995.1	58399.2	46181.6
1203.08	77548.1	51791.1	60046.4	46127.8
1202.08	78524.1	53025.4	59073.5	45311
1201.08	77711.1	51546.1	59638.4	45975.9
1200.08	77704.4	52106	58729.2	45680.1
1199.08	78298.1	52083.1	59163.8	44746.8
1198.08	77022.2	51589.7	58828.4	45010
1197.08	79906.7	50292.2	59858.6	46283.3
1196.08	78319.1	52155.6	59159.1	46435.6
1195.08	78318.8	52275.3	59562.2	47066.8
1194.08	77929.5	52070.2	62611.7	45186.6
1193.08	80522.9	52027.9	60269.4	45593
1192.08	81252	52261.6	61836.8	45746.4
1191.08	79063.6	51757.8	59727.5	44968.2
1190.08	78070.9	53025.2	60780.7	45334
1189.08	81668.1	53382.2	60426.1	44958.3
1188.08	80784.4	52675.9	60616.5	45863.5
1187.08	80656.8	52243.4	60003.7	46555.3
1186.08	79348.2	51554.6	60480.1	46640.6
1185.08	82310.2	52814.8	59498.6	46371.5
1184.08	81004.6	53811	61060.6	45860.8
1183.08	79899.7	53114.6	60027.3	45875.5
1182.08	80197.2	53275.9	59108.5	46438.4
1181.08	81130.9	52792.2	61239.5	46828.8
1180.08	82628	53298.1	60939	46488.1
1179.08	81621.5	52440.4	60701.6	46601.3
1178.08	79612.3	53711.2	59972.6	45310.2
1177.08	80087.4	53421.6	60428.3	47728.7
1176.08	81585.1	52869.3	61279.7	45548.4
1175.08	81167.1	53824.4	60340.5	46508.5
1174.08	82381.9	54323.7	61754	46464.9
1173.08	80774.3	53786.4	62876.6	46382.2
1172.08	81200.4	52818	60590.2	48869.4
1171.08	81647.9	53491.6	61422.8	47001.4
1170.08	82517.4	53993.6	60449.1	47990.1
1169.08	81497.5	53716.2	61924.4	48300.4
1168.08	82484.5	53659.3	61736.6	47204.2
1167.08	83158.2	52958.1	63585.9	47995.2
1166.08	82941.2	54072.4	62402	48213
1165.08	83488.3	54312.8	62133.1	47864.8
1164.08	83785.9	53789.8	61243.2	47087.4
1163.08	83069.7	54629.8	63452	47098.1
1162.08	83921.5	55371.3	63681.8	48324.5
1161.08	83450.4	54711.4	63058.6	47454.9
1160.08	83963.8	54305.5	62068.7	48160.3
1159.08	84154.9	55512.5	61715.7	47964.5
1158.08	83594.1	55451.1	62708.3	47817.6
1157.08	84048.3	54091.7	63342.9	47095.4
1156.08	84387.6	54885.4	63442.1	47568.3
1155.08	84236.9	55184.4	62393.1	48597.1
1154.08	83160.9	55707.7	61943.3	48167.2
1153.08	84150.5	53740.9	63599.9	47474.8
1152.08	84453.8	55310.9	62939.1	48701.5
1151.08	84363.4	55386.2	63253.7	47862.9
1150.08	84469.7	55000.1	63356.8	48904.3
1149.08	85341.6	55269.8	63311.9	48087.6
1148.08	84411.7	56220.8	63655.1	47436.4
1147.08	85359.4	55800.7	62777.2	49011.7
1146.08	83549.9	55438.5	63125.3	49284
1145.08	85422.7	55102.4	63765.2	48219.4
1144.08	85583.5	55604.3	64326.7	48381.2
1143.08	86661.9	55500.9	64427.7	49041.6
1142.08	85026.1	56120.2	62992.1	49678.8
1141.08	87914.9	55776.1	63789.1	49464.6
1140.08	86332.3	57545.5	65449.5	48018.9
1139.08	84596.1	55052.1	64635.2	49001.9
1138.08	86520.4	55527.6	64235.2	48523.2
1137.08	84983.7	55845.3	63407.1	48809.3
1136.08	88429.2	56860.2	63518.8	49202.5
1135.08	86550.7	55842.6	64847.9	49247.9
1134.08	88552.9	57108.5	64494.8	49126.4
1133.08	87609.2	56858.5	65376.4	49081.4
1132.08	86684.8	55904.1	65771.4	49211.7
1131.08	86757.1	56937.6	63568.6	49049.3
1130.08	85589.3	57108.5	65039.7	49931.8
1129.08	87494	55711.9	66112	50069.5
1128.08	88111.6	57672.1	65301.4	50393.4
1127.08	87940.7	56605	64809.6	48792.4
1126.08	87038.8	58100.6	65830.3	49401.8
1125.08	87034	57679	65416.7	50185.2
1124.08	87742	56512.6	65866.8	49455
1123.08	89931	57776.3	64644.1	50383.7
1122.08	86916.9	56769.2	64719.8	49651.9
1121.08	87725.9	57271	64478.5	50566.8
1120.08	86588.5	55274.1	64980.4	50066
1119.08	88865.1	55670.8	65534	48942.6
1118.08	88668.3	56746.4	66241	48858.2
1117.08	88373.7	56084	65591.1	49954.9
1116.08	87972.9	58013.5	65051	48235
1115.08	87449.7	56718.5	65710.9	49576.2
1114.08	89509.2	57328.5	64917	48586.8
1113.08	88704.5	57464.6	65462.5	49901.1
1112.08	88088.9	57092.8	66670	50578
1111.08	88854.3	58161.9	67452.4	50493.3
1110.08	90000.6	56690.7	66231.5	49225
1109.08	89195.5	58744.1	66492.4	50018.6
1108.08	92087.7	58644.8	67221.9	50976.2
1107.08	90902.9	57726.4	66285.7	51459.8
1106.08	90052.9	57609.1	66354.5	51124.2
1105.08	90042.9	56705.5	67274.7	50110.5
1104.08	89929.6	58615.5	67522.1	49149.1
1103.08	90367.5	57582.7	66821.8	50864.6
1102.08	91042.4	56905.3	66228.5	50098
1101.08	88993.6	58312.9	65551.2	51211.2
1100.08	88942	58370.9	66366.5	50026.9
1099.08	89221.7	58482.5	66081.7	48687.4
1098.08	91081.7	58373.8	65704.7	48854
1097.08	89442.9	57426	66236	49285.8
1096.08	87404.4	56755	65470	49121.1
1095.08	90179.5	57352.7	65682.2	47812.7
1094.08	90015.7	58071.3	66718.9	48867.2
1093.08	90295.2	57584.9	66049.4	50231.1
1092.08	90979.1	58247.4	65873	49024.4
1091.08	88787.4	57745.4	67198.6	48130
1090.08	89321.7	57323.2	66724.6	49526.4
1089.08	91886.7	57094.1	66451.3	48804.1
1088.08	92104.7	57550.2	66578.7	49002
1087.08	91587.6	56185.9	67585	48967.8
1086.08	90863.5	58810.6	65632.1	49018.3
1085.08	91366.4	57408.7	68396.6	48766.8
1084.08	90508.4	58080.5	67277.8	50125.7
1083.08	91213.1	57652	67009.6	49209.4
1082.08	91176.2	58501	66891.6	49748.9
1081.08	91573.1	58978.4	68560.7	49551.6
1080.08	91237.7	57970.8	69059.7	49529.9
1079.08	91777.5	58193	69308.9	49876.4
1078.08	93040.1	58984.7	68127.7	49792.4
1077.08	91156.4	58556.9	67678.1	50381.8
1076.08	91625.9	58364.2	67462.4	50188.8
1075.08	93663.2	57372.4	68787.8	50137.2
1074.08	91771.1	58153.1	68020.2	49935.8
1073.08	91634.3	58349.7	68088.1	50567.2
1072.08	91876.1	59629.7	68457.6	50828.4
1071.08	93175.7	58504.5	69588	50185.5
1070.08	93349.3	59866.2	68450.4	50752.3
1069.08	94281.9	59848.9	69048.6	50376.7
1068.08	93323.3	59148	68622.8	50765.3
1067.08	96115.9	59139.7	68953.2	52261.2
1066.08	93832.2	58186.7	69901.7	51102.6
1065.08	94613.3	59459.1	70414.2	50935.7
1064.08	92987.5	60208.7	68654.3	51311.7
1063.08	94997.4	59123.6	69660.2	52030.7
1062.08	96081.6	60639.4	69777.1	52255.6
1061.08	95699.5	60540.4	69979.6	50505.6
1060.08	94567.8	59131.3	69843.5	51756.2
1059.08	95182.1	59136.9	69643.8	52475
1058.08	94561.7	61102.5	69369.4	51362.7
1057.08	96332	61240.1	71242.3	51281
1056.08	96634.1	60862.1	71742.9	51878.9
1055.08	94679.8	59922.9	71519.6	51621.9
1054.08	95459	60522.9	71826.7	51662.4
1053.08	98072.3	61204.7	71814.8	51338.1
1052.08	96052.4	60841	70974.9	53357.8
1051.08	97456.6	62019.3	72209.1	52715.7
1050.08	96446.3	61724.2	71852.4	53524.4
1049.08	96715.9	59693.1	71980.6	51331.1
1048.08	97609.6	61422.2	71903.1	51502
1047.08	95800.9	61916.1	72460	52495.1
1046.08	97760.6	61357.1	72585.2	53248.9
1045.08	98179.7	61933.8	73489.7	53889.7
1044.08	98003.9	61027	73279.1	52776.7
1043.08	99204.8	61751.9	73872.8	53435.2
1042.08	97816.7	62613	73765	52516.2
1041.08	98849.7	62913.8	72537.6	52511.1
1040.08	97244.8	62460.1	72921.7	53455.3
1039.08	98616.5	62373.7	73209.4	53399.3
1038.08	100071	62111.1	73183	53865.7
1037.08	98977.4	62764.8	73281.5	53416.5
1036.08	98485.5	63341.2	73457.4	53447.1
1035.08	99555.1	62694.8	73751.4	53969.3
1034.08	99388.4	63839	72286.2	53514.3
1033.08	102032	63523.3	73232.4	54522.7
1032.08	100669	62407.4	73606	52422.3
1031.08	98911.9	61940.4	74398.4	54519.1
1030.08	100352	61362.2	74779.9	54761.2
1029.08	101143	62814.7	73361	53931.4
1028.08	102112	63848.1	75171.1	53678.7
1027.08	101115	63757.1	75550.2	54914.7
1026.08	103461	64189.1	75043.6	54549.4
1025.08	102778	62599.2	75092.7	55010.4
1024.08	102351	64176.2	75943.4	55089.3
1023.08	102945	64942.1	75998.8	55142.2
1022.08	103400	63917.2	75215.4	54254.8
1021.08	104572	64386	75982.6	55380.5
1020.08	102317	64354.3	75941.7	56003.2
1019.08	102674	65083.2	75642.7	55867.6
1018.08	104345	65916.1	76380.3	55121
1017.08	104832	65538.1	76638.9	54631.3
1016.08	104458	66955.3	78423.9	55417.6
1015.08	104686	66535.1	76934.3	55876.4
1014.08	104719	65271.3	77010.8	55212.7
1013.08	104419	64936.5	78083.8	54946.4
1012.08	103867	66422.9	77596.9	55087.1
1011.08	106415	65146.3	76605.1	56430.2
1010.08	103495	65524.6	77768.7	54780.7
1009.08	104219	65728.1	77334.2	55170.3
1008.08	103789	64983.1	77210.5	56109.4
1007.08	104612	66990.2	76981.6	56214.8
1006.08	105348	65736.6	79384.4	55863.4
1005.08	106694	66573.8	78689.5	57640
1004.08	106169	66593.4	79641.5	57225.7
1003.08	110125	68000.3	80209.5	57861.5
1002.08	110469	68460.4	81082.3	58802.7
1001.08	109355	67931	81968.2	58972.8
1000.08	110044	70148.5	82871	59625.7
999.08	111476	69624.5	81754.7	58074.4
998.08	109989	68873.8	81054.6	57996.1
997.08	108015	68527.8	78947.1	58146.8
996.08	106829	67880.1	79463.7	58745
995.08	108143	66074.2	79683.1	57411.2
994.08	109090	67009.2	79226.5	56381.2
993.08	107278	66696.4	77740	56640.6
992.08	106580	65250.3	79269	55608.2
991.08	105576	64860.1	78153.1	55697.9
990.08	103249	64886.2	78129.1	53995
989.08	103871	64306.6	76658.4	55020.8
988.08	105216	65584.3	76510.4	54573
987.08	104604	63497	76796.5	53229.7
986.08	104805	63769.5	76100.7	54208.8
985.08	104557	62558.2	76155.4	54296.6
984.08	104565	64242.7	77003.6	54609.2
983.08	106989	64588	78871.4	53679.5
982.08	108033	65919.4	79509	55551.7
981.08	111981	66644.3	82287.1	56816
980.08	112063	68869.4	85400.5	57652.9
979.08	117898	72152.2	86531.9	59808.7
978.08	121325	72909.1	89361.1	61629.6
977.08	119175	73488.1	86409.1	61768.4
976.08	116659	72119.9	83811.7	62962.4
975.08	112856	70879.5	83463.9	60360.7
974.08	108209	70251.8	79130.6	57960.4
973.08	107760	67384.2	79719.8	57070.1
972.08	106074	67187	78123.9	56218.5
971.08	103643	65065.7	77013.3	54852.8
970.08	101435	64379.9	73802	54771.6
969.08	99175.8	61358	73311.9	53270.7
968.08	96812.4	60101.5	70211.5	50887.5
967.08	93153.5	58078.5	69122.5	49604.1
966.08	92777.2	57757	69237.1	49436.3
965.08	92789	56461	66048.4	48413.8
964.08	91706.2	56049.6	67352.3	47840.6
963.08	91526.9	58117.5	67197.5	47621.5
962.08	90152.1	55412.7	67568.1	48672
961.08	92291.5	56151	66982.3	48785.6
960.08	93236.8	57101.3	68270.4	48132.3
959.08	91875.2	56626.3	65301.7	48148
958.08	92267.7	56004	66969.8	49655.2
957.08	92234.3	55907.5	66208.7	48208.2
956.08	90206.4	56889	66780.8	48402.8
955.08	90551.8	56718.9	67653.7	48954
954.08	90739.1	56061.5	67060.1	48762.4
953.08	90721.2	55103.7	67116.9	47971.1
952.08	91383.2	57341.7	67104.4	49214
951.08	91783.5	55282.7	67741.3	48258.8
950.08	94423.3	56754.8	67489	48371.8
949.08	92271.3	56992.4	67304.7	49094.9
948.08	91170.6	56717.6	68537.5	47981.7
947.08	92379.2	56946.1	67699.8	49084.6
946.08	91013	56056.4	69344.4	47996.8
945.08	92277.8	56139.7	67772.3	48363.1
944.08	90871.7	57382.5	67547.5	47550.6
943.08	92584.4	57316.4	68410.3	48808
942.08	92799.9	57217.9	69901.9	47827.2
941.08	91946.8	55466.7	68315.9	48787.5
940.08	91767.5	56882.5	68986.2	50386.1
939.08	92515.7	56835.9	68745.3	48914.4
938.08	93821.1	57387.2	69113.7	49322.4
937.08	93033.5	57152.5	68370	49280.8
936.08	92617.6	56160.4	69737	49614.1
935.08	93207.9	56094.2	67964.2	49324.7
934.08	94467.8	56768.5	69024	49886.4
933.08	92998.2	58478.3	69359.2	49680.5
932.08	92886	58279.7	69464.8	49208.1
931.08	94151.8	57823.7	69220.8	49842.2
930.08	93118.6	58248.5	70516.4	49645.1
929.08	93399.1	57180.8	68456.1	50035.1
928.08	94145.2	56191.2	69219.7	49543.7
927.08	94444.8	58691.7	69586.2	49568.2
926.08	94430.9	58430.9	70490.8	49977.8
925.08	92825.4	58569.2	71655.5	49212.6
924.08	96321.2	58578	69686.4	50753.2
923.08	93801.1	57144.6	69953.2	50129.7
922.08	94343.6	57952.5	69701.4	49299.9
921.08	95691	57463.4	69988.4	49366.1
920.08	94802.7	58337.4	70111.3	49835.2
919.08	94899.9	57799.4	70845.6	50411.4
918.08	96294.5	58490	69887.4	50609.7
917.08	96042.7	58478.7	70607	48739.1
916.08	96090	57971.6	70977.5	50623.6
915.08	95914.1	59101.9	70890.4	50887.7
914.08	96102.3	58700.4	69560.6	51362
913.08	94380.5	58493.6	70805.4	50181.7
912.08	96967.9	58321.9	70162	52294.4
911.08	96180	58537.3	71949.7	52047.9
910.08	94935.7	58094	70931.5	51753.5
909.08	95242.6	59682.3	69531.5	50898.1
908.08	94936.5	57382.5	70656.4	50581.9
907.08	95022.2	58664.4	72328.6	51666.6
906.08	96142.6	59901.9	71220.9	52364.6
905.08	95821.8	58569	70669	50905.7
904.08	94780.5	58757.8	71836.1	50491.5
903.08	94779	59039.8	71632.1	51917
902.08	96619.3	57795.8	71283.6	50343.7
901.08	95781.4	58779.3	71427.2	50128.6
900.08	96674.8	59281.3	72978.1	52447.5
899.08	95772.9	57817.1	71859.5	51490.3
898.08	96921.9	59363.7	72152.9	50244.5
897.08	95875.4	58871.4	71349.8	51930
896.08	95845.6	58498.9	72005.4	50776.2
895.08	97634.4	59528.2	71524.2	50900.8
894.08	95418.4	59016.1	72584.6	51669.9
893.08	96700.5	59665.5	72280.3	51808.9
892.08	95748.7	59036.3	70661.3	52253.1
891.08	96945.8	59466.9	73697.6	52938.5
890.08	95828.3	59231.3	73624.4	51508.7
889.08	95509.4	58758.8	72672.4	51278.1
888.08	96904.6	59546.7	72098.9	52659.2
887.08	95990.8	59066.2	73533.3	52289.5
886.08	97262	59818	72899.4	51700
885.08	95943	59152.5	72280.6	52193.2
884.08	95592.9	59578.7	73371.6	53302.8
883.08	95663.4	59557.6	73109.5	52867.6
882.08	97921.8	60320.8	73501.3	52151
881.08	95145.9	60036.6	73916.8	53356.7
880.08	95689.9	59813.9	72491	52617.8
879.08	96959	60025.9	74811.8	51878.1
878.08	97497.2	61336.2	73483.9	52911.1
877.08	97428	59512.6	73261.8	51926.7
876.08	96026.4	59918.1	72859.7	52069.8
875.08	94798.1	59907.7	71319.1	51259.1
874.08	95328.4	59416.9	72862.2	52010.9
873.08	95520.1	60014.1	72797	52011.2
872.08	95410.7	57822.8	71944	52136.8
871.08	95170.6	59262.6	72066.2	51541.2
870.08	93378.8	59853.9	71099	53037.9
869.08	95910.8	59113.4	72540.9	52330.5
868.08	94412.6	60879.8	71393.3	52048.5
867.08	93204.9	60175.3	73837.3	52288.9
866.08	95455.7	58665.6	71916.3	51949.1
865.08	95208.1	58712.7	73011.4	52360.9
864.08	93437.1	57981.3	72567.6	51673.3
863.08	94303.6	58672.3	73828.2	51810.6
862.08	95918.7	59843.6	73798.9	53143.8
861.08	96899.3	60543.5	74251	53201.9
860.08	96056.4	59725.6	74529.8	53041.8
859.08	97227.8	59853.9	73614.9	55395.6
858.08	94444.9	60598.2	73988.7	53776.9
857.08	94816.4	59300.1	74248.3	54497.1
856.08	95694.7	59188	73386.6	54224.3
855.08	94662.2	61049.7	73187	52580.2
854.08	94709	58899.8	71592.6	53180.5
853.08	95458.8	59220.5	73111.6	52110.1
852.08	93965.7	59520.4	72870.4	52786.6
851.08	93879.6	59262.1	71828.3	51417.4
850.08	93039.6	58530.1	71967.7	52832.2
849.08	94877.5	58343.9	70665.2	50498.4
848.08	91481.2	57646.4	70879.3	51059.1
847.08	90575.9	57340.7	68675.3	50929.7
846.08	91371.6	57214.9	70345.5	49927.1
845.08	90400.3	56737	68417.9	47771.2
844.08	90789.5	55866.3	67611	49507.3
843.08	89212.2	54679.9	66491.8	49444.3
842.08	88817.2	56333.2	67013.8	49333.2
841.08	87333.4	55365.8	67361.8	48132.2
840.08	88500.7	56534.2	66096.8	49250.5
839.08	88894.6	55386.9	68108.3	47800.3
838.08	89966.8	56354	66567.4	49276.8
837.08	90373.6	57457.6	68806.2	49318.9
836.08	91852.6	58369.3	69997.1	52182.7
835.08	93580	60390.6	72525.2	55214.1
834.08	94480.1	60787.8	73980.5	56511.8
833.08	95695.9	61089	75982.7	58118.7
832.08	96231.6	61098.4	74950.9	56534.1
831.08	94718.9	59290.8	73759.6	55185.4
830.08	91265.6	58893	72038.6	53012.4
829.08	93100.6	58270.5	69700.4	52488.6
828.08	90983.4	57818.9	69227.6	50071.8
827.08	88791.6	56844.8	68322	49191.6
826.08	88712.9	55921.6	66739.8	48873.1
825.08	87899.1	55126.7	65100.5	49195.8
824.08	86576.3	55150.3	64104.8	46108.5
823.08	85652.7	54162.8	63830.7	46391.7
822.08	84139.2	52346.4	62299.6	45182.9
821.08	85467	51370.5	61936.6	45226.7
820.08	84417.7	52164.3	61417.7	44227.3
819.08	83513.3	51344.8	62577.4	44568.4
818.08	83990	50220.2	62422.2	44979.2
817.08	84173.8	52115.8	61855.1	43235.5
816.08	83500.1	51634.7	62640	43944.2
815.08	83485.1	50738.7	61588	44156.9
814.08	84407.6	51029.4	61159	43687.5
813.08	83827.9	50744.8	62103.7	42880.6
812.08	85103.3	52194.4	62443.4	43628.9
811.08	86556.8	50657.4	61172.9	43727.7
810.08	83525.6	51125	61129.3	43665.2
809.08	84723.5	51450.7	62527.5	44771.5
808.08	85303.8	51369.2	61137.4	43062
807.08	86055.6	52172.6	60830.3	44022.7
806.08	85595.3	51611.2	62085.3	43409.3
805.08	84232.1	52402	61052.8	44363.8
804.08	84443.2	50664	61664.6	43082.5
803.08	85888	52618.4	60879.7	43839.4
802.08	83965.8	52643.7	62141.3	43867.5
801.08	84498.9	51111.3	62955.2	43663.8
800.08	84950.9	52018.7	61170.2	44975.9
799.08	84961.7	52434.6	62637.3	43378
798.08	86109.1	52753.5	62185	44008.4
797.08	85793	51068.3	62606.1	44631
796.08	85050.8	52912.2	62399.7	44183.6
795.08	87031.6	52071.4	62210.4	45274.2
794.08	84696.7	52122.5	62662.9	43544.8
793.08	86489.2	52586.5	61883.8	44212.9
792.08	86344.3	51417.3	63622.1	42743.3
791.08	85292.4	52185.7	62583.6	44413
790.08	86984.5	52117.4	63529.3	44625
789.08	85233.3	51887.6	62419.5	44905.6
788.08	87032.3	53356.6	63261.3	43471.5
787.08	86508.4	52515	63199.3	43999.3
786.08	85155.3	51995.4	61924.4	44647
785.08	85762.9	53066.2	63096.8	45245.5
784.08	86070.8	52865.2	63239.3	44183.1
783.08	85156.9	52488.2	62836.1	44962.7
782.08	84659.1	53524.7	64157	44855.5
781.08	86481.8	52328.5	62951.2	45403.7
780.08	85132.1	53128.3	62289.9	45417.3
779.08	87103.1	52781.2	64238.9	44850.9
778.08	86772.7	53317.4	62611.3	44740.4
777.08	85044.8	54369.8	62917.2	45324.4
776.08	85893	53211.3	63419.1	44964.1
775.08	85643	53769.1	64722.1	44212.5
774.08	85916.4	53383.4	63851.4	44734.1
773.08	86201.4	53612.2	62848.7	44600.6
772.08	86288.9	54312.9	65054.6	45533.2
771.08	86794.5	51852.9	63633	45159.5
770.08	86079.6	52807.4	62985	44538.5
769.08	86727.2	53239.1	63666.7	46130.3
768.08	89144.9	52827.4	63340.2	45097.2
767.08	87101.6	53330.4	64129.9	45557.9
766.08	88067.2	53621.8	63337.3	44891.5
765.08	87481.8	53518.4	63875.9	46789.8
764.08	88204	53331	63142.6	45024.2
763.08	87747.9	54672.6	65319.1	45659.1
762.08	87111.8	53841	64061.8	45605
761.08	88340.7	53658.9	64128.7	45758.8
760.08	87916	52910.5	64198.8	46182.7
759.08	88222.9	55359.1	65018.6	44977.6
758.08	87653	55662.6	65067.4	46233.8
757.08	87504.5	53575	64612.5	46047.2
756.08	87444.9	54249.6	64652.8	45136.9
755.08	87141.5	54376.4	64600.9	45765.2
754.08	87691.8	53025.6	64346.2	45515.7
753.08	84890.1	55017.4	64093.1	44772
752.08	87726.6	52466.5	64539.5	45967
751.08	86363.7	53582.4	64381.8	46110.7
750.08	88742.2	53320.4	63416.9	45823.1
749.08	87316.4	54294.4	64351.7	46673.8
748.08	87749.5	52396.5	63809.5	45479.6
747.08	86883.9	53031.4	64373	46206.5
746.08	86365.3	54702.4	63413.8	45285.4
745.08	86896	54601.9	64503.3	46303.3
744.08	86759.3	53500	64095.5	46506.8
743.08	88137.7	53434.5	65469.3	46736.9
742.08	85325.1	53150.9	65167.4	44834.4
741.08	87096.1	54377.4	65185.5	44927.7
740.08	86967.9	53869.2	65655.1	46747.6
739.08	87272.5	55286.7	65853.5	45922
738.08	86808.5	53316.3	65408.7	46857.3
737.08	87447.7	54144.6	64558.5	47209.6
736.08	88461.1	53723.2	65279.6	47180
735.08	87075.1	52859.1	65136.3	46104.7
734.08	86119.3	53969	64407.5	46701.3
733.08	87072.5	52596.1	65100.1	46661.7
732.08	87659.5	54024.1	65248.7	47191.3
731.08	86703.4	54233.4	63792.8	47207.4
730.08	86698.6	53539.6	63608	44981.2
729.08	85064.3	52719.4	64375.2	45640.5
728.08	85342.1	52833.7	64333.2	45861.3
727.08	86577.6	54095.3	64643.4	46566.2
726.08	86579.4	52863.5	65246.2	45625.9
725.08	85922.1	52839	63872.6	44958.8
724.08	87142	53001.9	64657	44648.9
723.08	86274.2	52144.4	64214.8	45350.7
722.08	84113.8	53849.3	64087.5	46242.2
721.08	84301.4	52585.9	64471	45413
720.08	85217.7	53095.8	65213.5	46437
719.08	85426.5	55039.6	63862.6	46264
718.08	86178.9	54222.6	64298.2	45818.8
717.08	86616.7	54141.7	65269.6	46917.1
716.08	85779.5	55334.9	64347.4	48097
715.08	85744.6	53012.2	65681.1	47161.9
714.08	86221	55467.7	65426	46651.9
713.08	87389.3	55597	65539.6	46145.2
712.08	86695.4	54572.8	65876.6	47042.9
711.08	87101.2	54275	65796.4	47484.4
710.08	86567.8	54982.2	66595.2	47107.2
709.08	86154.3	55832.1	66287	46119.9
708.08	85374.7	54447.6	65526.1	48074.6
707.08	84943.9	56084.6	66320.9	46115.7
706.08	85186.4	53378.5	64635.1	46493.2
705.08	83483	52673.7	64703.8	45781.7
704.08	82534.2	50976.7	62984.9	45282.7
703.08	82021.7	51221.1	63080.7	43434.1
702.08	81599.9	51599.4	61307.5	43663.5
701.08	78622.3	50575.3	59826.1	43361
700.08	79415.6	49490.7	57887.8	41062.6
699.08	77603.2	49761.2	56669.8	41078.4
698.08	73642.3	46965.3	55614.5	40031.5
697.08	74181.5	45588.9	53678.1	38023
696.08	74203.7	46435.2	53946.7	38417.2
695.08	72657	45692.3	52692.2	37397
694.08	71196.3	45031.1	52537	37428
693.08	69393.5	43918.9	49998.2	36456
692.08	70927.1	43282.8	48890.7	37208
691.08	72124.4	43483.4	51181	36188.7
690.08	72829	45489.7	55225.4	39037.1
689.08	92569.1	54837.2	77830.2	51535.3
688.08	143237	91739.4	135612	94281.1
687.08	151055	114700	131665	117919
686.08	96050.5	72198.5	72845.1	67247.6
685.08	73574.7	48033.2	52718.9	40086.5
684.08	70224.8	44877.3	50618.5	36012.1
683.08	69348.9	42823.4	51251.1	36041.1
682.08	68429.9	42504.1	49683.7	35433.5
681.08	68711.5	42247.8	48594	36605.8
680.08	67712.9	42319.5	49053.1	35515.7
679.08	68632.6	43851.5	49756.5	35115.1
678.08	69522.5	43311.1	49715.4	33948.1
677.08	70881.5	42389.9	49692.5	35752.4
676.08	69734.4	43556.4	50501.7	35078.2
675.08	68804.2	43410.1	49192.7	35283.9
674.08	69204.2	43621.6	49545.2	35731.7
673.08	70174.8	42836.5	49628.5	35362.1
672.08	70766.6	43079.2	48487.1	34967.6
671.08	71277.7	44255.5	49424.4	35087.1
670.08	71628.6	42656.6	50049	35092.1
669.08	70568.8	44233.9	50963.5	36044.7
668.08	69213.9	43783.5	49256.4	36162.4
667.08	70521.6	42558.9	49706.2	35875.6
666.08	71002.9	43705.1	49865	35482.7
665.08	69990.9	42923.8	49782.7	34685.8
664.08	70001	43234.1	50678.9	36057.4
663.08	71970.9	42617.1	50529.3	34695.6
662.08	70653.4	42800.4	49251	35194.9
661.08	70168.9	42733.1	50673.3	35645.7
660.08	71030.6	44828.3	50195.7	35442.3
659.08	71907.8	44430.4	51338.1	35507.1
658.08	70101.7	43972.9	49458.5	35554.9
657.08	71930.9	44294.5	49884.4	36381.7
656.08	71019.3	44423.9	51217.1	36585.4
655.08	72940.4	44085.9	50207.8	35977.1
654.08	70732.5	43766.2	51444.2	35960.3
653.08	71755.9	44647.2	51472.1	36761.2
652.08	73388.1	44221.9	50114.6	35782.2
651.08	72761.4	43512.5	51052.1	35482.3
650.08	71068.8	43900.9	51253.5	35720.1
649.08	72321.9	44108	50287.1	35920.3
648.08	72413.6	43593.6	51784	36699.5
647.08	73149.1	44261.5	52241	36035.3
646.08	72332.4	45114.3	52265.5	36432.2
645.08	72182.5	44037	51971.5	36747.1
644.08	73173.1	45143.8	51667.7	35734.6
643.08	72884.7	45178.8	53047.8	36524.9
642.08	72754	44618.9	51509.8	36203.5
641.08	73485.7	44360.5	51940.4	36772.8
640.08	73281.8	44054.6	52609	35873.2
639.08	74888.5	45379	52882.2	37247.4
638.08	73451.4	45465.1	51469.9	37013.6
637.08	73297.3	44818.8	52278.2	37401.9
636.08	73668.7	44719.3	53497.6	36750.5
635.08	73698.4	45800.5	53502.6	37114.8
634.08	72906.9	46583.8	52900	37120.9
633.08	74197.4	44614.3	53545.4	37387.2
632.08	74656.4	45318.4	52042	37240.2
631.08	74281.5	45546.4	51660	37169.2
630.08	74211	45861.9	52737.1	37135.5
629.08	73339.6	45308.6	50894.8	36653.3
628.08	73983.6	44885.8	52326.3	38312.4
627.08	74908.3	46400.8	54158	37118.2
626.08	75971.2	44715.5	52165.7	37515.6
625.08	73379	44917.6	53369.2	38203.3
624.08	75138	46218.5	53258.2	38719.8
623.08	74432	45684.1	52951.2	37595.1
622.08	74952.9	45525.1	51842.6	38407.3
621.08	75268.3	46188.8	54101.4	38057.9
620.08	75815.7	46914.7	53661.6	38117.9
619.08	75988.2	46138.2	54106	38989.4
618.08	75476.9	46862.5	54323.2	38393.1
617.08	75119.4	47364.1	53545.3	37521.8
616.08	75729.9	46640.3	53552.9	37431.9
615.08	75886.5	46228.7	54868.1	37914.5
614.08	76086.8	46810.5	54020.8	38891.8
613.08	75990.6	46766	53820.3	37766.5
612.08	76898.3	46271.1	53464.1	39198.3
611.08	76844.1	46396.1	54439.1	38767.3
610.08	77608.5	46668.7	55278.6	39642.9
609.08	77553.7	45254.7	54806.5	39085.8
608.08	78940.9	46514.4	54193.9	36971
607.08	75920.4	46398.3	54922	38847.8
606.08	76295.1	47618.4	55040.3	38738.3
605.08	77525.5	46834.2	55760	37756.7
604.08	77091.6	47382	54635.5	39326.4
603.08	77786.4	47791	54140.3	40059.9
602.08	77236.1	47824.4	56060.9	38259.8
601.08	75907	46637.1	55071.1	39154.2
600.08	78906.1	46916.3	55963.1	38491.4
599.08	77647.7	46520.2	54993	38424.1
598.08	78161.4	47367.6	56444.8	38337.7
597.08	78553.1	47609.1	55886	39483.3
596.08	76950.2	47635.8	55591	38017.3
595.08	76228.6	46822.7	56411.4	38743.4
594.08	76606.5	46690.3	55135.3	38836.6
593.08	79245.1	48554.5	54235.7	38735.2
592.08	77056.2	48402.1	55701.9	39980.8
591.08	77694.8	46802	55814.6	39753.3
590.08	77548.2	48297.6	55097.4	39051.3
589.08	78482.3	47605.8	54780.7	39863.6
588.08	78035.5	47855.2	56268.6	38998.2
587.08	79349.9	49267.7	55727.6	39835.2
586.08	79795.7	48536.8	56399.2	40819.4
585.08	79291.2	48798.4	56669.9	39300.5
584.08	78378.4	48720.9	56131.5	39465.2
583.08	76532.4	48611.1	56227.7	39838.1
582.08	78806.2	47712.6	56198.5	40456.4
581.08	77720.2	48428.8	56484.4	40177.6
580.08	78228.1	48618.9	55916.4	39767.8
579.08	79287.6	48590.1	56983.7	39579.7
578.08	80225.3	48513.2	56773.5	40182.6
577.08	81904.9	49598.3	58073.8	41315.4
576.08	80585.1	50215.3	58019.5	42206.5
575.08	81114.7	49824	58156.4	40339.6
574.08	77177.1	48204.7	57620.4	40673.5
573.08	77712.7	48215	55266.8	39535.8
572.08	76430.6	46552.3	56016.4	38217.1
571.08	78526.8	47542.5	55598.3	39179.8
570.08	77093.3	48008.9	56080.5	39331.3
569.08	75202.5	47653.9	55589.2	38771.6
568.08	76617.4	46964.2	54676.3	38630.5
567.08	75608.5	46485.2	55934.7	37673.3
566.08	75287.9	46494.6	54254.9	37792.4
565.08	76482.3	46252.6	54397.3	38658.7
564.08	76230.3	46458.5	54475.5	37612.9
563.08	77105	46262.8	54835.9	38086
562.08	76294	46953.9	53450.7	37752.5
561.08	74700.9	45974	55998.9	38850.5
560.08	77186.5	46734	55930.5	38012.9
559.08	78109.7	48124	57125.3	39405.8
558.08	78200.1	48217.9	57172.2	40049.3
557.08	81755.8	49664.8	57841.5	40135.2
556.08	82245	50241.9	58894.4	41506.5
555.08	82695.9	51153.5	59824.3	41960.9
554.08	85001.6	51292.2	62026.9	42306.4
553.08	85058.8	50745.3	60199.5	41864.6
552.08	82931.4	51178.7	60570.9	42373.1
551.08	83453	51160.9	60493.2	42243.1
550.08	81391.5	49799.7	59475.9	41576.8
549.08	77035.2	48696.2	56846.3	39861.1
548.08	77831.4	46850.9	55251.3	38775.7
547.08	76413.1	45560	55069.3	38097.4
546.08	72890.6	44685.4	54174.9	37228.7
545.08	70358	44501.5	51656.4	37153.3
544.08	67018.3	42787.5	49229.5	34736.7
543.08	66125.7	40446.1	46672.6	32220.7
542.08	62987.3	39214.9	45417.7	31838.6
541.08	60269.1	37202.9	43250	31690.9
540.08	58907.2	36691.8	41915.7	30401.9
539.08	57730.2	35241.9	41739.7	30855.1
538.08	56335.2	35381.6	39658.2	28661.3
537.08	55166.3	35337.6	39082.7	28592.7
536.08	55362.8	34167.5	39874.1	28113.7
535.08	57389.2	35606.1	39851.4	27791.7
534.08	66019.2	38419.6	45658.9	30153.6
533.08	99401.6	50445.4	68887.2	38903.4
532.08	209532	98825.2	162168	76829.1
531.08	284080	171733	224585	142978
530.08	149251	122544	107921	106380
529.08	69230.5	49897.3	46746	40136.8
528.08	56174.2	35105.5	38875	28223.9
527.08	51894.9	31831	37216.7	26809.3
526.08	51967.5	30917.8	37285.3	26352
525.08	52116.6	31636.2	36356.2	26492.5
524.08	51430.1	30975.3	36869.9	25541.4
523.08	52097.2	30370.8	35848.9	25515.6
522.08	50824.2	30181	36498.3	24530.3
521.08	50092.3	31369	36490.2	25461.6
520.08	50403.3	30221.2	36266.1	25269.4
519.08	50225.2	30520.2	36372.9	25545.1
518.08	50092.2	31327.9	36617.1	24463.3
517.08	50425.7	30420.6	36459.5	25463.6
516.08	50909.8	31043.2	36389.1	26157.1
515.08	51545.8	30195.7	36432.4	25036.3
514.08	51666.1	31113.3	36833.3	24921.6
513.08	51705.5	30730.6	36064.8	25300.3
512.08	51241.2	31466.2	36121.1	24909.9
511.08	52475.5	31464.7	36164.1	25011.2
510.08	52279	31198.9	36344.2	25361
509.08	50227.9	30576.1	37666.9	25495.1
508.08	50397.5	31575.4	34939.2	26298.9
507.08	52114.3	30532.4	37178.2	25341
506.08	52605.3	31369	36107.9	25551.6
505.08	53625	31170.4	36874.8	25840.3
504.08	52197.5	30549.8	36045.7	25615
503.08	52172.4	31187.7	36990.4	25311.1
502.08	51043.5	30130.5	37252.6	25257.2
501.08	51221.5	30607.1	37667.1	25882.9
500.08	50437.5	30167.5	37525.2	25192.2
499.08	51876.6	32309.5	36010.9	25927.7
498.08	52821.9	31093.1	37000.7	25920.2
497.08	52454.7	31564.3	36036	25321.1
496.08	52768.7	30964.6	36691.1	26555.5
495.08	51395.7	32363.6	36910	25702.7
494.08	50969.9	31257.3	36557.1	25426.1
493.08	51927	31843.8	36540.2	26119.2
492.08	52371.8	29955	36898.5	26050.7
491.08	53542.7	31380.3	37795.5	26453.9
490.08	52186	32512.6	37442	25377.4
489.08	52324.5	31730.2	36822.4	26217.9
488.08	53191.4	31814.2	37275.2	26135.7
487.08	51960.7	32139.6	38200.2	26498.2
486.08	53290.5	32236.5	36700	26792.2
485.08	52952.2	32196.5	37323.8	27196
484.08	53897.2	31270.1	38028.8	26649.3
483.08	52268.4	32246	38076.7	26295.4
482.08	52250.9	32087.2	38140.3	26954.9
481.08	53009	32738	37271.1	25371.5
480.08	53927.9	33417.8	37382.4	26691.6
479.08	54273.9	31837.9	37227.8	26545.1
478.08	51254	32495.3	38077.8	26188.4
477.08	54544.1	31480.6	38309.1	26947.3
476.08	54170	32708.9	37883.9	26989.8
475.08	52588.3	31965.6	37146.4	27353.1
474.08	53787.7	31781	37989.1	26532.3
473.08	53387.5	32270.6	39293.3	26598.4
472.08	53717.8	32312.1	38643.7	26562
471.08	53619.2	32718.9	39059.1	26523.1
470.08	54693.8	32793.6	39419.3	26985.2
469.08	54143.2	32116.3	38497.2	27103.7
468.08	51981.2	33264.5	38762.6	26495.8
467.08	54423.5	32653.6	38561.6	26715.9
466.08	53154.7	32653.2	38356.6	26723.7
465.08	54101.8	32821.1	38077	28165.2
464.08	54565.2	33399.1	38879.2	26563
463.08	54476.6	33761.8	37842.3	26835.1
462.08	54266	33245.8	38963.3	26994.8
461.08	55495.3	32035.7	39191.4	27921.7
460.08	53286.3	31970.6	38651.7	27512
459.08	54700.6	31438.8	39369	28085.1
458.08	54774.9	32824.2	39308.9	27483.5
457.08	54198.7	32793.1	37994.2	26909.9
456.08	55015.2	32565.4	38974.5	28012.7
455.08	55104.7	32232.5	39359.6	27198.1
454.08	54864.4	32911.7	39882.6	27641.3
453.08	55424.9	32646.1	39048.4	28200.6
452.08	55107	33307.8	40000.1	27581.5
451.08	54983.9	33341.5	40065.7	27809.5
450.08	54364.3	32741.8	40194.3	27402.2
449.08	54827.9	33061	38760.8	26771.3
448.08	55618.2	33116.6	38339.4	28390
447.08	55127.3	33223.8	38484.2	27688
446.08	54857.7	33292.7	39981.7	27794.4
445.08	55016.2	32254.7	40062.9	26870.6
444.08	54723.6	32979.4	38260.4	27559.5
443.08	54833.6	33950.3	39772	27810.6
442.08	54240.6	33742	39245	27746.3
441.08	55997.4	33335.7	39733.6	27666.5
440.08	56207.1	32349.4	38385.7	27305.3
439.08	55077.4	33539.5	40543	28936.7
438.08	56474.4	33520.4	39118.8	27711
437.08	54465.6	34260.3	38908.8	27006.6
436.08	54770.6	33203	38904.2	27610
435.08	55586.9	33445.1	39370.2	28195.3
434.08	54801	33289.5	38850.8	27742.7
433.08	56055.5	34467.2	39213.8	27722.8
432.08	55917.2	32962.8	40255.1	27735.3
431.08	55799.4	33463.9	39157.6	27601.4
430.08	55911.1	33870	39802.8	28866.1
429.08	54955.1	34871.2	38523.9	27876.5
428.08	56118.9	33978.9	39759.3	28772.3
427.08	54841.1	34293.4	40370.6	27432.9
426.08	55741.5	33901.8	41063.1	28135.6
425.08	56984.4	34548.7	40143.5	28708.1
424.08	55843.2	33400.2	42267.3	28308.4
423.08	57235.7	35218.7	41185.7	28067.1
422.08	57915.8	34946.7	41329.1	29130.4
421.08	56871	34590.4	41598.7	27329
420.08	56123.4	33765.7	40672.7	27165.6
419.08	55986.8	34282.4	40277.4	28079.4
418.08	54659.9	32620.4	39557.6	26846.1
417.08	55898.5	33372.3	40217.1	27946.2
416.08	54051.5	33202.6	39942.1	27464.8
415.08	53913.9	32403.5	39174.6	27104.9
414.08	51746.6	31335.6	36961.7	26138
413.08	50845.2	30542.7	37459.1	25410
412.08	50693.4	30543.6	35597.4	26125.4
411.08	51878	31200.1	36671.8	25584.1
410.08	50256.9	29057	35826.7	25805.8
409.08	50873.5	30364.3	35352.9	26087.6
408.08	50399.2	30372.4	36288.7	25221
407.08	49296	30288.4	34941.3	24617.2
406.08	49422	29831.1	34974.3	24016.3
405.08	49290.3	29918.8	34299	24161.9
404.08	49699.6	29395.8	33574.1	23933.5
403.08	51481.2	29991.2	36769.8	24568.7
402.08	67755.1	38365.8	55883.5	32797.2
401.08	95513.8	61574.2	83312.2	60869.2
400.08	81613.9	59187.1	58946.6	54166.9
399.08	76695.9	49379.2	52762.9	40343.1
398.08	59541.5	41210.6	40238.3	32905.9
397.08	49645.8	31407.6	34918.6	24826
396.08	49328.7	29252	33006.7	22700.1
395.08	47488.8	27811.8	33012.3	23183.8
394.08	47861.3	28994.8	33400.1	23321.2
393.08	47202.3	28972.7	33023.1	23652.5
392.08	48617	28062.6	31739.1	23238.5
391.08	47626.1	27613.9	34386.1	24289.3
390.08	47369.5	28329.5	32742.7	23790.7
389.08	48503.1	27139.1	32875.1	22921.2
388.08	48554.2	28469.1	34123.5	23357.6
387.08	48842.5	28381.6	34085.2	23274.6
386.08	48411.4	28762.5	34334.5	23120.7
385.08	47507.4	28687.1	34420.2	23542.3
384.08	48195.1	28005.4	33883.7	23126.1
383.08	49460.5	28857.5	33482.1	23012.5
382.08	49007.2	29929.6	34204.2	23139.8
381.08	48097.1	29378	34113.1	23030.2
380.08	49240.1	29242.3	34300.8	23437.1
379.08	49955.7	28819.6	34084.4	23251.4
378.08	49272.2	29046.8	34840.8	23333.8
377.08	49972.3	29259.3	34821.4	23555.8
376.08	49568.8	29015.8	34781.1	23485.6
375.08	51201.3	29924.9	34676.7	23927.9
374.08	49488.6	28303.9	34867.4	23795.9
373.08	51073.7	29676.1	35514.6	23978.3
372.08	50039.9	29586.5	34692.9	23468.7
371.08	49608.2	29136.8	35014.2	24135.7
370.08	49943.1	29956.8	35453.2	24234.2
369.08	49903.3	29493.2	35130.9	23359.4
368.08	50769.3	30019	34927.4	23711.1
367.08	52569.3	29873.1	35019.3	24494.2
366.08	51064.7	30474.2	34875.2	23886.5
365.08	49761.8	29463.4	34579.9	23775
364.08	51531.2	29400.9	35293.1	24048.1
363.08	52524.8	29874.4	35630.9	24571
362.08	50816.2	30284.9	34531.7	25018.7
361.08	51894.3	30493.3	36308.5	24990.4
360.08	52685.8	30531.8	35433.8	24188.4
359.08	52039.6	29369.3	35707.5	25093.7
358.08	52830.1	30680.2	35433.4	24944.9
357.08	52687.4	29925.3	36436.9	24016.1
356.08	53295.4	30064.4	36065.7	24146.4
355.08	53327.9	31213.1	36655.2	25385.8
354.08	53291.7	31514.2	36498.5	24493.2
353.08	51906.5	31305.3	36800	24261.6
352.08	53302.1	31775.4	37253.2	25560
351.08	53805.5	30733	36760.3	24082.4
350.08	55146.8	31190.1	36119.7	25620.8
349.08	54728.8	31390.6	37427.3	24812
348.08	54755.8	31999.1	37256.7	24568.3
347.08	55883.9	32095.1	37647.6	25489.6
346.08	54156.6	32164.3	36834.9	25679.2
345.08	54122.8	32001.6	36494.9	25708.7
344.08	54773.9	32094.5	38788.9	25466.5
343.08	55684.7	32349.6	37045.7	24413.8
342.08	55052	31972.4	37885.5	24629.3
341.08	55082.1	31793.2	38150.6	26356
340.08	57246.4	32206.2	37788.6	26099.6
339.08	55931.1	32801.8	38097	25842.4
338.08	57238.8	32487.3	38902	25532.4
337.08	55818.3	32512.9	37172	26230.5
336.08	58074.9	32567.4	39006.6	26257.4
335.08	56693.1	33092.4	38033.3	26377.6
334.08	56874.7	31783.9	37986.3	25407.4
333.08	56534.8	33382.1	38386.3	26155.6
332.08	57581.8	33194.2	38187.9	26026
331.08	57502	32948.8	38172.8	25480.8
330.08	57811.3	33064.8	38285.8	26905.9
329.08	58731.2	33388.1	39391.3	26469.2
328.08	57448.5	34005.2	40797.2	27228.1
327.08	57842.8	32694.9	38637.4	26429.1
326.08	58758.6	33464.2	39044.2	26603.5
325.08	58187.2	33151.5	39682.8	26174.2
324.08	58080.9	32960.6	38918.1	26970.4
323.08	58400.5	33942.9	39672.2	27240.9
322.08	59687.1	33400.8	39925.1	28142.6
321.08	59197.2	33206.4	39481.4	26576.8
320.08	59315.7	33767.4	39900.3	27267.5
319.08	59509.6	34289.4	40349.7	27498.1
318.08	59065.1	33458.3	39127	27440.7
317.08	60386.5	34610.1	40484	26375.8
316.08	61176.5	34768.4	40518	27750.1
315.08	60343.5	34922.5	40124.8	28046.6
314.08	62120.4	35960.2	42379.1	28200.8
313.08	62998.9	36679.7	43270.5	28783.4
312.08	62911.6	36578.6	43249.7	28344.3
311.08	65692.8	36598.2	43463.2	29299.6
310.08	64127.3	37182.6	43501.5	29373.9
309.08	63935.2	37775.1	41977.3	29800.1
308.08	63459.6	37530.4	43737.9	28777.1
307.08	65671.9	36646.8	42118.4	29775.9
306.08	65205.9	36465.2	44130.5	29374.9
305.08	63559.3	37287.7	42796.7	28277.4
304.08	64387.2	35249.7	41977.6	28587.4
303.08	62922.6	35190.3	42049.4	27291.1
302.08	59099.1	33535	40246.2	26204.4
301.08	58492.5	32019.2	38293.5	26302.4
300.08	54623.3	30156.1	35568.1	23359.7
299.08	49159.7	28417.3	33366.5	21751.5
298.08	46628.9	26088.6	30509.2	21289.6
297.08	43672.4	23546.3	28872.9	19797
296.08	40564.5	23005.5	26907.7	18125
295.08	36915.4	22621.3	26226.2	17855.8
294.08	36363.8	21984	25497.6	16883.7
293.08	36451.8	21750.2	26681.3	18035.5
292.08	44763.8	26990.6	35284.1	24549.3
291.08	42814.5	29270.9	32053.7	26943.5
290.08	31516.7	20241.1	21345.3	16489.7
289.08	36250.6	18320.3	22666.8	16428.8
288.08	49055.7	25703.5	33595.1	20015.6
287.08	79671.8	43247.6	64494.6	38335.8
286.08	150924	88778.9	120777	79618.9
285.08	229811	132899	157279	113614
284.08	328441	173088	192227	131454
283.08	165578	112694	84042	74428.1
282.08	38350.7	26911.3	22600.5	17261.9
281.08	24477.9	14001.8	16295.9	12063.4
280.08	21491.7	13102.5	16054.9	10766.8
279.08	21323.6	12259.6	15097.1	9337.71
278.08	19660.5	11759.4	14141.5	9250.53
277.08	18305.4	10553	13926.9	8690.63
276.08	19949.3	10891.1	13904.9	9466.16
275.08	19028.1	11374.9	13679.9	8844.42
274.08	18861.5	10700	13668.1	8591.94
273.08	18202.1	10352.8	13312.2	8923.13
272.08	18535.1	11042.2	12984.6	8759.7
271.08	18640	10376.4	13991.9	8693.03
270.08	17999.4	10345.4	13868.8	9001.35
269.08	18986.9	10618	13603.7	9273.48
268.08	18759.3	10745.1	13603.6	9326.14
267.08	18130.8	10929.3	13489.9	9031.01
266.08	17486.1	10712.4	13360.4	8965.37
265.08	18295.3	10397	13796	8827.92
264.08	17973.9	11141.9	13529.5	8819.58
263.08	18736.8	10907.9	13249.3	8685.82
262.08	18963.6	10443.1	13734.2	8957.37
261.08	18499.4	11083.1	13907.1	8882.72
260.08	17787.5	10055.4	13453.4	9236.13
259.08	18581.6	10427.5	14137.2	8837.14
258.08	18805.3	10832.1	13631.8	8985.22
257.08	18282.8	11632	13624	9218.82
256.08	18967	10978.8	13576	8711.5
255.08	18374.9	11292	14034.8	9692.67
254.08	19023.1	11073.7	14340.7	9960.4
253.08	18557.9	11292.1	13954.1	9352.94
252.08	19672.3	10936.6	13594.1	9689.49
251.08	18766.1	11206.2	14004	9505.25
250.08	18406.4	11181.8	14402.6	9215.4
249.08	18298	10326.5	14162.5	8887.14
248.08	18172.7	10333.1	13561.8	9335.97
247.08	18001.8	10413.9	14144.3	8481.14
246.08	17507.7	10441.3	14015.3	8771.53
245.08	16615.1	9581.55	12747.1	8235.73
244.08	16607.3	9163.49	11522.7	8918.2
243.08	16470.5	9094.52	12620.3	7712.82
242.08	16732.2	9455.76	11565.3	7718.27
241.08	15529.4	8983.55	11859.8	7948.36
240.08	16217	9330.62	10712.2	7836.4
239.08	15329.6	9384.64	11264.8	7753.82
238.08	15928.3	9061.76	11439.3	7580.53
237.08	15460.2	8755.14	11607.9	7108.79
236.08	15972.9	9059.44	11827.5	7961.3
235.08	16589	9446.63	12120.6	8574.66
234.08	18507.3	10828.8	13675.8	9372.39
233.08	21932.9	12334	18445.9	12215.6
232.08	29584.2	17942.8	24565.5	17125.3
231.08	28657.4	20262.8	23928.1	18708.7
230.08	21855.6	15702.3	17272	14541.9
229.08	19339.1	11379.1	13750.8	10604.1
228.08	16658.5	9857.35	12273.8	8956.21
227.08	15483.4	9498.39	10766.3	7737.87
226.08	15207.6	8781.44	11250	7721.76
225.08	15252.9	8593.92	11547.9	7493.74
224.08	14513.8	8613.49	10812.5	7286.98
223.08	14430.8	8644.42	10806.1	6849.23
222.08	14021.3	7943.82	10125.7	7010.02
221.08	14090	8554.91	10115.2	7082.26
220.08	13598.2	8308.43	10435.8	6258.32
219.08	14383.1	8464.13	10473.2	6554.83
218.08	14087.1	8191.72	10185.8	6706.65
217.08	14035.6	8130.59	10210.9	6668.91
216.08	14210.6	8072.87	10586.3	6699.21
215.08	14553.1	8076.34	10235	6975.28
214.08	15035.9	8077.91	10189.4	6864.9
213.08	14228	7937.05	10616	6818.4
212.08	13870.3	7845.23	10702.7	6875.6
211.08	14371.7	8507.45	10377	7091.67
210.08	14285.3	8036.41	10890.3	7124.95
209.08	14368.8	7932.11	10771.7	7020.58
208.08	14181.5	7902.72	10602.2	6777.23
207.08	14413	7772.5	10500.1	6522.53
206.08	14164	7872.32	10329.1	7314.02
205.08	14465.2	8364.51	10224.4	6649.85
204.08	13770.3	8377.3	10713.6	6722.83
203.08	13961.8	8238.49	10544.5	6415.52
202.08	14244.3	8061.37	9783.43	7039.64
201.08	14160.9	7844.15	10430	6703.55
200.08	13280.8	8323.36	10233.7	6812.65
199.08	13972.5	8250.41	10391.2	6962.43
198.08	13843.7	8409.72	10465.2	6685.9
197.08	14297.4	7901.25	9497.82	6869
196.08	13991.6	8352.39	10332.6	6523.18
195.08	14151.1	8172.74	10521.3	7280.3
194.08	13646	8359.51	10361.4	7220.07
193.08	14441.2	8862.98	10838.7	6829.21
192.08	14907	8459.82	11265.3	7333.71
191.08	14654.1	8862.46	11590.6	7645.53
190.08	14308	9368.61	11783.9	7669.85
189.08	15319	8812.32	11880.5	7616.79
188.08	15660.3	8884.14	11358	7744.61
187.08	14973	8709.88	11230.4	7361.1
186.08	13373.2	8159.3	11244.1	7159.69
185.08	14011.7	8624.89	10554.4	6667.57
184.08	14056.9	8424.32	10255.6	6580.03
183.08	12779.6	7343.57	9869.18	6738.6
182.08	12795.9	7876.74	9470.4	5806.35
181.08	12417.8	6847.4	9783.5	5413.13
180.08	11015.4	6970.53	8542.02	5510.68
179.08	10724.5	6221.43	8109.98	4931.73
178.08	10890.1	6115.47	7769.44	5223.52
177.08	10626	5800.89	7451.55	4329.68
176.08	9597.49	6161.23	7538.19	4638.83
175.08	9576.99	5793.98	7073.67	4044.58
174.08	9763.75	5812.42	7323.43	4396.82
173.08	9581.13	5295.68	7813.14	4313.66
172.08	9367.35	5446.62	7366.93	4478.23
171.08	9942.06	5391.25	7161.4	4613.89
170.08	13519.8	6476.88	10699.7	5766.51
169.08	27436.8	13443.5	24072.2	13498.1
168.08	41445.6	25469.6	37750.8	25894.3
167.08	35381	27674.1	30126.7	27210.8
166.08	14323.1	11187.7	9811.03	10116.2
165.08	9499.48	5777.21	7223.17	4931.16
164.08	8904.24	4866.21	6274.67	3841.84
163.08	9301.67	5025.26	6331.34	4026.87
162.08	9194.9	4771.4	5859.7	4275.98
161.08	8313.62	4782.12	6175.94	3797.07
160.08	8280.48	5106.03	6147.85	3817.64
159.08	8450.63	4807.04	6243.3	3635.95
158.08	8565.42	5386.43	5729.21	3755.59
157.08	8810.46	4960.88	6480.78	3977.33
156.08	9535.71	5188.72	7126.35	3644.57
155.08	11126.6	5806.24	7986.12	4041.04
154.08	15903	7546.17	12416.8	4695.4
153.08	27278.3	10265.5	20316.2	5058.62
152.08	27682.7	11718.8	19982.9	6088.58
151.08	15961.7	9077.81	11811.6	4618.58
150.08	11213.1	6485.5	7797.21	4143.45
149.08	10192	5495.1	6477.94	4032.75
148.08	9365.39	5276.02	6478.09	3593.03
147.08	8686.23	4521.35	5906.03	3715.16
146.08	7823.23	4704.51	6532.09	3822.85
145.08	8615.22	4785.2	6015.97	4028.01
144.08	8893.2	4885.46	5874.02	3984.92
143.08	8758.5	4939.35	6250.46	3428.23
142.08	8167.81	4625.55	6120.91	3669.37
141.08	8636.81	5024.38	6187.91	3634.22
140.08	9036.87	4822.8	5893.42	3637.04
139.08	8770.04	4790.72	5507.05	3796.98
138.08	8380.07	4461.52	6321.97	4091.5
137.08	8109.47	4559.69	6021.32	3878.46
136.08	8611.21	4778.4	6158.45	3765.84
135.08	7814.33	4362.23	6428.07	3980.18
134.08	8369.31	5241.95	6362.56	4052.96
133.08	8526.91	4814.72	6283.13	3787.8
132.08	8627.61	4906.38	6335.3	3919.22
131.08	8515.64	4828.61	6342.85	3653.21
130.08	8340.51	5010.24	5964.11	3721.95
129.08	8512.24	4907.6	6256.26	3998.34
128.08	8974.75	5080.84	6031.45	3764.69
127.08	8922.94	5095	6755.37	3664.97
126.08	9070.92	5336.43	6620.07	3620.37
125.08	9606.23	5262.22	6213.26	3990.31
124.08	9110.45	5234.53	6292.61	3622.71
123.08	9577.08	5208.44	6575.63	3728.7
122.08	9154.25	5117.99	6328.62	3681.8
121.08	8490.83	5648.83	6881.92	3653.44
120.08	9449.05	5228.38	6154.6	3876.35
119.08	9691.76	5266.58	6333.1	4130.97
118.08	9651.73	5371.98	6645.81	4224.15
117.08	8807.51	4774.46	6989.06	4007.1
116.08	9373.95	5109.71	6719.2	4052.22
115.08	8915.64	4889.19	6486.14	3684.45
114.08	9060.45	5513.62	6516.58	4048.36
113.08	8504	4883	6431.39	3587.39
112.08	8239.97	4812.27	6081.99	3668.65
111.08	8230.36	5059.76	5936.56	3948.44
110.08	8378.58	5074.37	5717.87	3711.42
109.08	8309.99	4899.09	5786.66	4105.36
108.08	9191.04	5012.88	5633.31	4345.12
107.08	8241.35	4954.04	6039.82	3750.44
106.08	8731.98	4811.54	6099.28	3977.96
105.08	8419.08	4793.51	5947.67	3913.97
104.08	8982.04	5381.29	6875.46	3974.61
103.08	13892.1	6892.42	10208.7	4341.29
102.08	27348.3	10601.5	22760.1	5892.19
101.08	30948.8	13350.6	24535	6940.8
100.08	14179	8569.6	10439.9	5124.29
99.08	8873.46	5709.04	7033.83	4245.58
98.08	8788.11	5000.01	5679.58	4231.17
97.08	8483.87	5323.91	5847.83	4247.65
96.08	8674.78	4939.21	5740.55	3713.27
95.08	8620.13	4639.87	5837.31	4079.27
94.08	8639.19	4594.57	5891.86	4025.22
93.08	8761.21	4898.7	6084.1	3916.2
92.08	8691.27	4794.87	6151.93	3894.08
91.08	8286.09	4808.76	6069.16	4141.45
90.08	8081.08	4970.6	6086.71	4397.93
89.08	8428.35	5339.25	5985.43	4486.92
88.08	8183.16	4789.81	5859.93	3537.97
87.08	8874.79	4693.13	6272.21	4209.94
86.08	8382.02	5335.64	5941.03	4208.9
85.08	7982.75	4683.86	5608.81	4016.72
84.08	8233.88	4587.52	6307.95	3829.74
83.08	8596.67	5171.32	5584.91	4110.73
82.08	8733.36	4665.71	6089.68	4027.95
81.08	8183.41	5267.76	6154.01	4163.75
80.08	8656.27	4913.81	6065.89	3816.44
79.08	8543.29	4972.07	6348.05	4342.86
78.08	8483.78	4810.18	6327.83	4028.6
77.08	8221.17	5486.48	6214.27	4068.33
76.08	8909.86	5007.66	6125.42	4518.3
75.08	9027.26	5473.96	6074.29	4372.25
74.08	8383.5	5134.4	6239.98	4133.11
73.08	8442	5053.96	6495.23	4414.17
72.08	8082.4	5170.85	6292.84	4134.1
71.08	7712.8	5135.6	6160.18	4131.55
70.08	8942.44	4943.08	6379.68	4104.28
69.08	8429.73	4849.17	5971.4	4123.19
68.08	8377.5	5201.99	6211.8	4310.43
67.08	8368.73	4885.85	5991.13	4267.69
66.08	8945.5	5000.15	6077.27	4287.14
65.08	8316.37	5405.19	5872.77	4027.24
64.08	8445.47	5394.29	6116.84	4102.38
63.08	8486.89	5162.22	6589.46	3955.16
62.08	8287.6	5244.34	6812.15	4297.52
61.08	8830.12	5238.93	6046.16	4140.84
60.08	8124.77	4791.58	6363.1	4800.2
59.08	8433.99	5082.59	6441.03	4136.55
58.08	8673.13	5566.88	6792.2	4719.74
57.08	8732.33	5187.79	6057.74	4670.86
56.08	8825.23	5097.5	6185.72	4369.87
55.08	8649.09	5069.11	6469.06	4438.87
54.08	8945.64	5412.57	6667.78	3973.6
53.08	8587.08	5489.16	6305.47	3949.13
52.08	8589.31	5101.74	6750.3	4003.49
51.08	8571.26	5220.73	5919.28	4064.56
50.08	8646.09	5048.2	5750.97	4185.06
49.08	8616.11	5105.92	6093.34	4159.69
48.08	8506.49	4910.46	5816.48	4079.91
47.08	7739.84	5142.89	5922.1	4270.51
46.08	7497.27	5004.74	6126.29	4163.4
45.08	7777.12	5264.19	5921.79	4117.81
44.08	8105.54	5286.2	6094.48	4151.93
43.08	8077.81	5259.14	6107.21	3971.01
42.08	7423.6	5100.68	5401.76	4068.61
41.08	6802.42	4099.59	5678.65	3613.43
40.08	7169.84	4342.3	5315.34	3579.78
39.08	6685.7	4290.32	4838.94	3650.1
38.08	6712.12	4268.43	5283.11	3755.39
37.08	7434.38	4433.91	5977.62	3609.21
36.08	7876.08	4907.51	6341.43	4297.87
35.08	9066.61	5728.35	7380.69	4890.57
34.08	9790.49	5550.53	8088.22	5533.89
33.08	9921.87	6696.56	8534.08	5713.95
32.08	10565.7	6569.02	8428.2	5978.79
31.08	8709.16	6076.49	7428.89	5231.6
30.08	8195.79	4637.47	5963.72	4408.74
29.08	6922.23	4476.45	6011.01	3893.86
28.08	7572.91	4730.88	5938.64	4311.06
27.08	7693.81	5126.03	5715.7	4183.96
26.08	7984.48	5259.75	6876.14	4453.09
25.08	9649.95	6532.75	7012.1	4518.79
24.08	9689.71	5746.65	7361.35	4595.17
23.08	8639.99	5794.06	6408.75	4664.73
22.08	5757.46	4392.05	4510.84	3584.62
21.08	4519.3	2962.41	3112.54	2550.09
20.08	4247.63	2831.94	3092.32	1999.08
19.08	5387.86	3064.25	4051.79	2419.32
18.08	6945.78	3645.44	5238.36	3907.39
17.08	7338.91	4581.05	5021.3	3780.31
16.08	7071.92	4165.84	4936.12	3243.53
15.08	6696.26	4077.06	4929.09	3377.08
14.08	6904.21	4290.58	4777.11	3516.82
13.08	6082.92	4110.93	4395.54	3381.48
12.08	6053.4	3656	4948.09	3371.27
11.08	5756.48	3402.49	4349.69	3211.44
10.08	6141.14	3951.62	5311.37	3130.21
9.08	7003.65	4916.92	5659.5	4432.51
8.08	3994.62	3388.36	3307.64	2869.93
7.08	2956.73	1675.07	2123.49	1556.1
6.08	2831.05	1483.37	2190.41	1447.38
5.08	2993.03	1726.8	2237.8	1469.63
4.08	2169.1	1532.16	1554.81	1059.01
3.08	1054.29	825.676	657.53	762.932
2.08	377.194	395.877	278.703	271.344
1.08	142.102	63.2265	135.916	139.375
0.08	68.3304	54.1576	38.8401	56.1456
-0.92	59.884	56.3849	56.1662	27.3274
-1.92	17.7918	24.2421	17.0906	6.37213
-2.92	11.2385	3.1698	0	33.7179
-3.92	11.2428	8.07147	18.8374	11.2427
-4.92	22.4911	11.247	3.649	11.2451
-5.92	33.7503	22.4991	0	0
-6.92	0	11.2526	7.04709	33.76
-7.92	22.5128	0	4.20785	11.2581
-8.92	11.2588	0	33.7839	0
-9.92	34.0115	11.263	0	11.2642

## Sheet: Fig. 1d
	1:3		1:4		1:5		1:6
Strain(%)	Stress(kPa)	Strain(%)	Stress(kPa)	Strain(%)	Stress(kPa)	Strain(%)	Stress(kPa)
0	0	0	0	0	0	0	0
0.16943	0.02631	0.1756	0.02894	0.09558	0.04195	0.083	0.05992
0.33292	0.02398	0.34211	0.03094	0.29679	0.04328	0.29931	0.06526
0.48452	0.02398	0.49046	0.03628	0.40746	0.05129	0.45022	0.06025
0.61828	0.02431	0.62973	0.03094	0.55837	0.05396	0.59861	0.06793
0.7669	0.02398	0.7811	0.03361	0.68665	0.04695	0.74701	0.07193
0.89472	0.02927	0.93854	0.03027	0.81492	0.04762	0.8778	0.0686
1.04929	0.0306	1.09597	0.03294	0.96583	0.04762	1.02871	0.07494
1.19791	0.0296	1.24735	0.03094	1.09411	0.04929	1.17962	0.07527
1.36437	0.03094	1.41386	0.04262	1.22238	0.04896	1.32802	0.0736
1.51597	0.03861	1.57129	0.03895	1.35065	0.04962	1.47641	0.07527
1.64379	0.02331	1.7257	0.04162	1.50157	0.05296	1.6072	0.07927
1.79241	0.03127	1.88313	0.04295	1.62984	0.04796	1.7556	0.07794
1.94698	0.03995	2.03753	0.05062	1.75811	0.05062	1.90651	0.07594
2.09858	0.04195	2.18891	0.04762	1.90903	0.0543	2.05491	0.08061
2.25018	0.03694	2.34634	0.04629	2.03478	0.05596	2.2033	0.08495
2.37799	0.04095	2.4735	0.04262	2.16306	0.06159	2.35421	0.08657
2.52959	0.03828	2.62488	0.04729	2.29133	0.05758	2.48249	0.0889
2.67821	0.05163	2.77928	0.05229	2.43973	0.06159	2.63088	0.08628
2.82981	0.04595	2.93368	0.05363	2.568	0.05992	2.78179	0.09157
2.98141	0.04128	3.08809	0.05129	2.69628	0.06092	2.93271	0.08957
3.10625	0.05396	3.24249	0.05696	2.84719	0.05792	3.0811	0.09224
3.26082	0.05096	3.3969	0.05925	2.97546	0.06359	3.20938	0.09324
3.40945	0.04896	3.5513	0.05925	3.10374	0.06326	3.35777	0.09424
3.56402	0.0573	3.70873	0.05925	3.23201	0.05825	3.50617	0.09825
3.71561	0.05296	3.86011	0.06459	3.38041	0.06359	3.65708	0.10292
3.84046	0.05992	4.01754	0.06659	3.50868	0.06493	3.80547	0.09725
3.99503	0.0563	4.16892	0.07026	3.63947	0.07093	3.93626	0.10258
4.14663	0.05563	4.32332	0.0686	3.78787	0.06426	4.08215	0.10325
4.29822	0.05925	4.48076	0.07026	3.91614	0.07327	4.23306	0.10492
4.44982	0.06459	4.63516	0.07394	4.04442	0.07127	4.38397	0.10492
4.57466	0.06192	4.76534	0.07193	4.17269	0.0746	4.53236	0.11093
4.72626	0.06626	4.91975	0.07327	4.3236	0.06993	4.68327	0.11193
4.87786	0.06659	5.07113	0.08061	4.44936	0.07127	4.81155	0.10959
5.02648	0.0716	5.22856	0.07861	4.57764	0.07761	4.95994	0.11755
5.18105	0.07293	5.38296	0.08461	4.72603	0.08228	5.11086	0.11588
5.30887	0.07293	5.53434	0.08757	4.85431	0.0766	5.26177	0.11522
5.45749	0.07527	5.69177	0.08824	4.9851	0.07927	5.41016	0.11722
5.60909	0.07627	5.84315	0.08757	5.11337	0.07927	5.53844	0.12122
5.76069	0.07727	5.99452	0.09391	5.26177	0.08361	5.68683	0.12189
5.90931	0.08028	6.15196	0.09791	5.39004	0.0869	5.83523	0.12589
6.0401	0.08495	6.30636	0.09191	5.5158	0.08161	5.98362	0.12423
6.1917	0.08495	6.46076	0.09624	5.66671	0.08528	6.13705	0.12923
6.34032	0.08495	6.61517	0.10258	5.79247	0.08361	6.26533	0.13023
6.49489	0.09024	6.76655	0.10626	5.92326	0.08495	6.41624	0.13257
6.64352	0.09224	6.92398	0.10158	6.05154	0.09124	6.56212	0.1349
6.77134	0.09558	7.07838	0.11059	6.20245	0.09224	6.71303	0.13357
6.92293	0.09758	7.20554	0.10292	6.33324	0.09591	6.86394	0.13991
7.07156	0.09992	7.35994	0.11226	6.45899	0.09725	7.01485	0.13891
7.2291	0.09925	7.51435	0.11588	6.60739	0.09791	7.14313	0.14124
7.37772	0.10292	7.66875	0.11655	6.73567	0.10325	7.29152	0.14225
7.50257	0.10192	7.82316	0.11655	6.86394	0.10425	7.43992	0.14487
7.65417	0.10492	7.97756	0.12289	6.99221	0.10192	7.58831	0.14687
7.80576	0.10325	8.13197	0.12623	7.14313	0.10659	7.73922	0.15021
7.95736	0.10525	8.28637	0.12456	7.26888	0.10025	7.86498	0.15421
8.10896	0.1146	8.44077	0.12756	7.39967	0.10258	8.01589	0.14987
8.2338	0.11689	8.59518	0.13257	7.54555	0.10258	8.16681	0.15521
8.38837	0.12256	8.74958	0.13858	7.67634	0.10425	8.3152	0.15621
8.53997	0.12122	8.90399	0.14024	7.80462	0.11159	8.4636	0.16088
8.68859	0.12323	9.05839	0.14487	7.93289	0.10892	8.61451	0.15788
8.84019	0.1279	9.20977	0.14654	8.0838	0.11059	8.74278	0.16088
8.96801	0.1309	9.3672	0.15187	8.21208	0.11555	8.89369	0.16489
9.1196	0.13791	9.49739	0.15688	8.34035	0.11855	9.04209	0.16856
9.2712	0.13958	9.64876	0.15955	8.48875	0.11426	9.193	0.1719
9.4228	0.13858	9.80619	0.16222	8.61702	0.12523	9.3414	0.17352
9.57737	0.14754	9.95757	0.16522	8.7453	0.12022	9.46716	0.17552
9.70221	0.14024	10.112	0.17223	8.87357	0.12589	9.62058	0.18052
9.85084	0.1472	10.2664	0.17886	9.02197	0.12256	9.76898	0.18253
10.0024	0.15354	10.4208	0.17919	9.15024	0.12389	9.91989	0.18119
10.157	0.15621	10.5752	0.18119	9.276	0.13324	10.0658	0.1862
10.3056	0.15788	10.7296	0.18887	9.42691	0.13657	10.1966	0.18686
10.4334	0.16589	10.881	0.19587	9.55519	0.1349	10.345	0.18787
10.585	0.16923	11.0384	0.19487	9.68598	0.13324	10.4959	0.19754
10.7337	0.17652	11.1928	0.20055	9.81425	0.13724	10.6443	0.19687
10.8882	0.17919	11.3442	0.20784	9.96516	0.1482	10.7927	0.20217
11.0398	0.18219	11.5016	0.20884	10.0934	0.15755	10.9436	0.2025
11.1647	0.18853	11.656	0.21318	10.2217	0.14754	11.0718	0.21051
11.3163	0.19254	11.7862	0.22219	10.3701	0.15821	11.2228	0.21251
11.4679	0.19754	11.9436	0.22486	10.4984	0.14024	11.3712	0.21118
11.6224	0.2055	12.095	0.23382	10.6267	0.15855	11.5221	0.21651
11.774	0.20984	12.2494	0.23849	10.7575	0.15655	11.6705	0.22552
11.8989	0.20484	12.4008	0.23749	10.9033	0.16756	11.7987	0.22452
12.0505	0.21284	12.5552	0.24783	11.0316	0.16055	11.9496	0.23048
12.1991	0.21651	12.7126	0.2525	11.1624	0.16355	12.0955	0.23382
12.3507	0.21985	12.864	0.25851	11.3083	0.17385	12.249	0.23482
12.5053	0.22853	13.0184	0.26314	11.4391	0.17519	12.3948	0.24016
12.6301	0.23248	13.1728	0.26981	11.5673	0.17852	12.5256	0.2465
12.7787	0.24183	13.3242	0.27315	11.6931	0.18453	12.6765	0.24283
12.9333	0.24917	13.4816	0.27882	11.844	0.18453	12.8249	0.2475
13.0849	0.24817	13.636	0.28683	11.9723	0.18353	12.9758	0.25484
13.2365	0.25451	13.7904	0.29178	12.1006	0.1872	13.1242	0.26314
13.3613	0.25851	13.9479	0.29579	12.2515	0.18853	13.2752	0.2618
13.513	0.26614	14.0992	0.3028	12.3772	0.1932	13.4009	0.26681
13.6675	0.28015	14.2294	0.3108	12.508	0.19721	13.5518	0.27148
13.8161	0.28382	14.3838	0.31743	12.6363	0.19788	13.7002	0.27615
13.9677	0.28282	14.5382	0.32444	12.7822	0.21385	13.8511	0.27715
14.0955	0.29112	14.6926	0.33145	12.913	0.21184	13.9995	0.28216
14.2471	0.29145	14.847	0.33945	13.0387	0.21351	14.1278	0.28716
14.3987	0.3018	15.0015	0.34908	13.1921	0.22386	14.2787	0.28912
14.5474	0.31448	15.1528	0.35476	13.3179	0.22552	14.4271	0.29979
14.7019	0.31843	15.3103	0.36043	13.4462	0.23248	14.5755	0.30513
14.8238	0.33044	15.4616	0.37044	13.5745	0.23148	14.7264	0.30847
14.9784	0.33512	15.616	0.37907	13.7228	0.23782	14.8773	0.31347
15.127	0.33979	15.7735	0.38808	13.8536	0.2445	15.0056	0.3181
15.2786	0.34942	15.9248	0.39609	13.9794	0.24883	15.154	0.3231
15.4332	0.35743	16.0823	0.40471	14.1278	0.25384	15.3049	0.32911
15.558	0.36677	16.2367	0.41372	14.2586	0.26681	15.4533	0.33712
15.7126	0.3764	16.3911	0.42974	14.3843	0.2618	15.6017	0.34413
15.8642	0.38174	16.5213	0.43074	14.5151	0.26814	15.7325	0.34312
16.0158	0.39075	16.6727	0.44671	14.6635	0.26881	15.8809	0.35509
16.1674	0.40142	16.8301	0.45972	14.7943	0.27882	16.0293	0.36009
16.2922	0.40905	16.9845	0.46568	14.9201	0.28182	16.1777	0.36443
16.4468	0.41839	17.1359	0.47669	15.0685	0.29279	16.3286	0.36977
16.6014	0.43107	17.2903	0.492	15.1993	0.29445	16.4569	0.37506
16.75	0.44471	17.4416	0.50301	15.3275	0.30046	16.6078	0.38441
16.9016	0.45238	17.5991	0.51202	15.4533	0.30713	16.7562	0.39008
17.0235	0.46301	17.7535	0.52832	15.6042	0.3171	16.9071	0.39642
17.1751	0.47169	17.9049	0.54234	15.7325	0.32477	17.058	0.40705
17.3267	0.48303	18.0623	0.5513	15.8608	0.33445	17.2064	0.41205
17.4812	0.49467	18.2167	0.56264	16.0117	0.34575	17.3372	0.41739
17.6299	0.50534	18.3681	0.58395	16.1374	0.35042	17.483	0.42674
17.7577	0.52031	18.5255	0.5963	16.2657	0.35576	17.6365	0.43141
17.9093	0.52966	18.6799	0.60626	16.3965	0.36944	17.7849	0.44137
18.0579	0.54133	18.8071	0.62027	16.5449	0.37411	17.9307	0.44704
18.2125	0.56131	18.9645	0.62962	16.6757	0.3804	18.0615	0.45472
18.3611	0.57365	19.1159	0.64559	16.8014	0.38774	18.2099	0.46301
18.4889	0.58395	19.2703	0.66456	16.9498	0.39709	18.3583	0.46969
18.6405	0.59897	19.4247	0.67991	17.0781	0.40438	18.5093	0.48203
18.7921	0.6146	19.5761	0.69554	17.2064	0.41839	18.6576	0.48804
18.9437	0.63129	19.7335	0.71223	17.3372	0.42073	18.7884	0.496
19.0953	0.64826	19.8879	0.72987	17.4856	0.43236	18.9368	0.50401
19.2201	0.65793	20.0423	0.74655	17.6138	0.43937	19.0877	0.51602
19.3747	0.67357	20.1967	0.76552	17.7421	0.44938	19.2361	0.52732
19.5233	0.68592	20.3511	0.7865	17.888	0.45505	19.3845	0.53666
19.6749	0.70622	20.5025	0.80781	18.0188	0.47169	19.5354	0.544
19.8295	0.72953	20.6569	0.8305	18.1471	0.48437	19.6637	0.55363
19.9781	0.74455	20.8113	0.8478	18.2753	0.48771	19.8121	0.56731
20.1059	0.76519	20.9687	0.87111	18.4237	0.50601	19.963	0.57628
20.2575	0.78249	21.1231	0.89776	18.552	0.50801	20.1114	0.59163
20.4091	0.80018	21.2473	0.91111	18.6828	0.53166	20.2623	0.6013
20.5607	0.82482	21.4047	0.94076	18.8312	0.53666	20.3881	0.6116
20.7153	0.84513	21.5591	0.9664	18.9595	0.55931	20.539	0.62995
20.8372	0.86477	21.7135	0.98738	19.0877	0.55864	20.6899	0.63991
20.9888	0.88613	21.8679	1.01402	19.216	0.57332	20.8383	0.65426
21.1404	0.9091	22.0223	1.04201	19.3644	0.58161	20.9892	0.66523
21.292	0.93442	22.1767	1.06732	19.4927	0.59296	21.1376	0.68858
21.4435	0.96407	22.3311	1.0963	19.6184	0.61694	21.2659	0.69588
21.5714	0.9787	22.4855	1.12962	19.7719	0.62027	21.4143	0.71323
21.723	1.00673	22.6399	1.16128	19.9001	0.63758	21.5652	0.73554
21.8746	1.03371	22.7943	1.18492	20.0284	0.64692	21.7161	0.75218
22.0262	1.06036	22.9457	1.21857	20.1567	0.65927	21.8645	0.76853
22.1778	1.08767	23.1031	1.2549	20.3076	0.68124	21.9903	0.7885
22.3026	1.11866	23.2545	1.28822	20.4359	0.69588	22.1412	0.80781
22.4542	1.14697	23.412	1.32154	20.5616	0.70923	22.2921	0.82349
22.6058	1.17896	23.5421	1.35186	20.7151	0.72953	22.4405	0.84613
22.7574	1.2119	23.6935	1.3848	20.8458	0.74655	22.5914	0.87144
22.906	1.24289	23.8509	1.42713	20.9691	0.75885	22.7172	0.88746
23.0368	1.27254	24.0053	1.46245	21.0999	0.77849	22.8681	0.91511
23.1884	1.30752	24.1567	1.49839	21.2458	0.79417	23.019	0.93875
23.337	1.33851	24.3142	1.54039	21.374	0.81481	23.1674	0.9674
23.4886	1.38084	24.4686	1.58105	21.5023	0.8325	23.3183	0.98971
23.6432	1.41645	24.623	1.62067	21.6507	0.85314	23.4667	1.01769
23.768	1.44977	24.7774	1.66099	21.7815	0.87478	23.5975	1.04334
23.9196	1.48743	24.9318	1.70795	21.9073	0.8918	23.7459	1.06665
24.0712	1.52042	25.0862	1.75295	22.0355	0.91678	23.8943	1.10064
24.2228	1.56103	25.2406	1.80024	22.1865	0.93475	24.0452	1.13363
24.3744	1.60903	25.3889	1.84619	22.3147	0.96206	24.1936	1.16495
24.4993	1.64164	25.5464	1.89553	22.443	0.97903	24.3218	1.19326
24.6538	1.69198	25.6977	1.94348	22.5914	0.99739	24.4702	1.22491
24.8054	1.73626	25.8279	1.99177	22.7197	1.02604	24.6212	1.26024
24.9541	1.77626	25.9854	2.04278	22.8505	1.05001	24.7695	1.29256
25.1057	1.83022	26.1398	2.09941	22.9762	1.07232	24.9204	1.33017
25.2335	1.86254	26.2911	2.15771	23.1271	1.09301	25.0487	1.36249
25.3821	1.91617	26.4486	2.21663	23.2554	1.12662	25.1971	1.40315
25.5367	1.9708	26.5999	2.27331	23.3837	1.15031	25.348	1.44276
25.6883	2.02109	26.7574	2.33556	23.5346	1.17295	25.4964	1.48876
25.8399	2.07538	26.9118	2.39653	23.6604	1.20527	25.6473	1.52804
25.9677	2.12606	27.0632	2.46084	23.7886	1.21157	25.7957	1.57138
26.1133	2.18235	27.2206	2.52982	23.9169	1.25557	25.924	1.61332
26.2709	2.24828	27.372	2.59307	24.0678	1.28054	26.0749	1.65532
26.4225	2.31059	27.5264	2.66138	24.1986	1.32321	26.2208	1.70161
26.5711	2.36788	27.6808	2.73465	24.3244	1.35948	26.3717	1.74894
26.6989	2.42518	27.8321	2.80597	24.4728	1.3848	26.5201	1.80257
26.8505	2.48915	27.9896	2.8829	24.6035	1.43313	26.6484	1.84586
26.9991	2.55847	28.144	2.96156	24.7268	1.45745	26.7993	1.90015
27.1537	2.6274	28.2711	3.02315	24.8576	1.49277	26.9502	1.95283
27.2994	2.69504	28.4286	3.10848	25.006	1.54006	27.0986	2.00479
27.4272	2.75467	28.583	3.19342	25.1342	1.57037	27.2495	2.06709
27.5817	2.83328	28.7374	3.2777	25.265	1.618	27.4004	2.12873
27.7304	2.91089	28.8948	3.36565	25.4134	1.66133	27.5287	2.17702
27.8849	2.98387	29.0462	3.4609	25.5417	1.69498	27.6796	2.24199
28.0365	3.07449	29.2006	3.55318	25.67	1.7366	27.828	2.30691
28.1644	3.14008	29.355	3.64547	25.7982	1.77859	27.9764	2.37389
28.316	3.23003	29.5094	3.73976	25.9467	1.82455	28.1248	2.44087
28.4675	3.32532	29.6638	3.84669	26.0724	1.87317	28.2531	2.5035
28.6162	3.40927	29.8182	3.94793	26.2032	1.9165	28.404	2.57277
28.7707	3.50456	29.9696	4.04556	26.3541	1.97013	28.5524	2.64775
28.8956	3.5855	30.127	4.16116	26.4799	2.01608	28.7033	2.72369
29.0472	3.68146	30.2784	4.27042	26.6107	2.06342	28.8517	2.80296
29.1988	3.77938	30.4328	4.37767	26.7389	2.11438	28.98	2.87361
29.3504	3.88234	30.563	4.47897	26.8873	2.17101	29.1309	2.95322
29.502	3.98226	30.7144	4.59123	27.0181	2.22097	29.2793	3.03716
29.6268	4.07454	30.8718	4.71184	27.1439	2.26864	29.4302	3.12645
29.7784	4.17351	31.0262	4.83578	27.2948	2.33027	29.5786	3.21173
29.93	4.29206	31.1806	4.96167	27.4205	2.38123	29.7295	3.30535
30.0816	4.38335	31.335	5.08795	27.5513	2.43953	29.8578	3.38196
30.2302	4.50796	31.4894	5.21885	27.6796	2.49416	30.0087	3.48125
30.361	4.61488	31.6438	5.3498	27.828	2.56047	30.1546	3.57916
30.5097	4.73915	31.7982	5.49171	27.9563	2.61576	30.308	3.67679
30.6612	4.85909	31.9496	5.62294	28.082	2.67473	30.4539	3.77404
30.8158	4.99132	32.107	5.76252	28.2355	2.75067	30.5846	3.86566
30.9674	5.11827	32.2614	5.9091	28.3637	2.81264	30.733	3.96862
31.0893	5.23053	32.4128	6.05635	28.492	2.88057	30.8814	4.07721
31.2439	5.3661	32.5703	6.20694	28.6203	2.94354	31.0324	4.18614
31.3925	5.49867	32.7216	6.3582	28.7687	3.02086	31.1833	4.30207
31.547	5.6403	32.8488	6.48209	28.897	3.09046	31.309	4.39536
31.6987	5.78354	33.0062	6.64269	29.0278	3.16344	31.4625	4.5143
31.8265	5.9021	33.1576	6.80291	29.1736	3.24004	31.6083	4.63356
31.9781	6.04968	33.315	6.96646	29.3044	3.32065	31.7592	4.75178
32.1267	6.19827	33.4694	7.13006	29.4327	3.38763	31.9076	4.87839
32.2783	6.34852	33.6238	7.29728	29.5585	3.4619	32.0585	5.00534
32.4299	6.50874	33.7782	7.47218	29.7068	3.55519	32.1868	5.11727
32.5547	6.64269	33.9326	7.64908	29.8351	3.63046	32.3352	5.24817
32.7063	6.80257	34.084	7.82198	29.9634	3.71474	32.4861	5.38278
32.8609	6.9718	34.2415	8.01051	30.1143	3.8117	32.6345	5.52069
33.0095	7.1354	34.3959	8.19109	30.2451	3.89598	32.7829	5.65994
33.1611	7.30463	34.5503	8.37762	30.3709	3.98092	32.9137	5.78354
33.2889	7.44887	34.7047	8.56953	30.5017	4.07188	33.0621	5.92345
33.4376	7.61943	34.856	8.75773	30.65	4.17251	33.2105	6.07399
33.5921	7.80129	35.0135	8.95828	30.7783	4.27075	33.3614	6.22091
33.7437	7.98253	35.1679	9.1512	30.9066	4.35737	33.5123	6.37951
33.8953	8.16377	35.295	9.32343	31.0575	4.47764	33.6607	6.53343
34.0231	8.32132	35.4494	9.5306	31.1833	4.56592	33.789	6.66867
34.1718	8.5069	35.6038	9.73615	31.3141	4.6645	33.9399	6.83422
34.3234	8.69181	35.7552	9.93936	31.4398	4.76947	34.0883	6.99082
34.4779	8.89631	35.9126	10.1599	31.5882	4.88373	34.2367	7.15704
34.6266	9.08923	36.0671	10.3711	31.7165	4.99232	34.3876	7.32093
34.7544	9.25779	36.2215	10.5913	31.8473	5.09429	34.5159	7.46751
34.906	9.46267	36.3759	10.8145	31.9931	5.22018	34.6643	7.63807
35.0546	9.66221	36.5303	11.0357	32.1239	5.33111	34.8152	7.8093
35.2092	9.8711	36.6847	11.2686	32.2497	5.4417	34.9636	7.99054
35.3608	10.086	36.8391	11.4968	32.378	5.56431	35.112	8.16611
35.4856	10.2552	36.9935	11.725	32.5289	5.69559	35.2428	8.32666
35.6372	10.4754	37.1479	11.9618	32.6572	5.80685	35.3912	8.51257
35.7888	10.6949	37.3023	12.1987	32.788	5.93375	35.5396	8.6991
35.9404	10.9118	37.4567	12.4459	32.9338	6.0727	35.6905	8.88768
36.095	11.143	37.5869	12.6497	33.0646	6.1956	35.8414	9.07955
36.2198	11.3299	37.7383	12.8876	33.1929	6.32521	35.9898	9.27542
36.3714	11.5584	37.8927	13.1431	33.3186	6.44648	36.1155	9.43636
36.523	11.7959	38.0471	13.3903	33.4721	6.60303	36.2664	9.6452
36.6716	12.0235	38.1984	13.6392	33.5978	6.72964	36.4174	9.84541
36.8262	12.2703	38.3559	13.9017	33.7286	6.86154	36.5683	10.05
36.954	12.4682	38.5103	14.1602	33.8745	7.02047	36.7167	10.2555
37.1026	12.7034	38.6647	14.4207	34.0028	7.15637	36.8424	10.4344
37.2542	12.9499	38.8463	14.7279	34.1311	7.29895	36.9933	10.6529
37.4058	13.2004	38.9735	14.949	34.2593	7.43686	37.1417	10.8621
37.5545	13.4423	39.1279	15.2109	34.4102	7.60675	37.2927	11.0847
37.6823	13.6611	39.2823	15.4848	34.5385	7.75234	37.4436	11.3106
37.8339	13.916	39.4367	15.7552	34.6668	7.89792	37.5718	11.5004
37.9855	14.1738	39.5911	16.0281	34.8152	8.07382	37.7227	11.731
38.14	14.432	39.7455	16.3022	34.9435	8.22674	37.8711	11.9532
38.2887	14.6965	39.8969	16.5751	35.0717	8.37728	38.0221	12.1924
38.4165	14.9108			35.2025	8.53922	38.1705	12.4182
38.5681	15.1839			35.3509	8.71945	38.3214	12.6614
38.7197	15.4488			35.4792	8.88201	38.4471	12.8613
38.8713	15.7219			35.6075	9.04456	38.598	13.0998
39.0229	15.9948			35.7559	9.23314	38.7489	13.349
39.1447	16.2213			35.8867	9.40404	38.8973	13.5719
39.2993	16.4994			36.0124	9.56826	39.0457	13.8317
39.4479	16.7786			36.1407	9.74282	39.1715	14.0476
39.5995	17.0591			36.2891	9.94337	39.3249	14.3051
39.7541	17.348			36.4174	10.1189	39.4733	14.5643
39.9027	17.6341			36.5481	10.3028	39.6242	14.8235
				36.6966	10.5144	39.7726	15.0869
				36.8248	10.6959	39.9235	15.3485
				36.9556	10.8881
				37.0814	11.0744
				37.2323	11.2986
				37.358	11.4931
				37.4863	11.6853
				37.6372	11.9188
				37.7655	12.1144
				37.8963	12.3226
				38.0221	12.5278
				38.1705	12.766
				38.2987	12.9769
				38.4245	13.1847
				38.5779	13.4393
				38.7062	13.6575
				38.8345	13.878
				38.9652	14.0986
				39.1111	14.3554
				39.2394	14.5806
				39.3677	14.8125
				39.5161	15.076
				39.6469	15.3105
				39.7726	15.5453
				39.921	15.8235

## Sheet: Fig. 2b
		Initial Capacitance (nF)
	a	b	c	Mean	Standard Deviation
1:3	25.5	28.1	33.2	28.9333	3.91706
1:4	51.8	56.3	61.1	56.4	4.65081
1:5	91.9	98	105	98.3	6.55515
1:6	190	198	209	199	9.53939

## Sheet: Fig. 2c
	1:3		1:4		1:5		1:6
Stress(kPa)	Capacitance (μF)	Stress(kPa)	Capacitance (μF)	Stress(kPa)	Capacitance (μF)	Stress(kPa)	Capacitance (μF)
0	0.0281	0	0.0563	0	0.098	0	0.198
0.02631	0.02874	0.02894	0.05771	0.04195	0.10586	0.05992	0.21781
0.02398	0.0288	0.03094	0.05796	0.04328	0.10619	0.06526	0.21822
0.02398	0.02891	0.03628	0.05828	0.05129	0.10663	0.06025	0.21863
0.02431	0.02901	0.03094	0.05866	0.05396	0.10701	0.06793	0.21894
0.02398	0.02909	0.03361	0.05895	0.04695	0.10745	0.07193	0.21909
0.02927	0.02923	0.03027	0.05921	0.04762	0.10783	0.0686	0.21931
0.0306	0.02932	0.03294	0.05947	0.04762	0.10804	0.07494	0.21967
0.0296	0.02943	0.03094	0.0598	0.04929	0.10827	0.07527	0.21969
0.03094	0.02953	0.04262	0.06016	0.04896	0.10863	0.0736	0.21982
0.03861	0.02964	0.03895	0.06058	0.04962	0.10901	0.07527	0.22007
0.02331	0.02975	0.04162	0.06089	0.05296	0.10931	0.07927	0.22094
0.03127	0.02986	0.04295	0.0612	0.04796	0.10958	0.07794	0.22205
0.03995	0.02994	0.05062	0.06189	0.05062	0.10989	0.07594	0.22283
0.04195	0.0301	0.04762	0.06265	0.0543	0.1102	0.08061	0.22333
0.03694	0.03025	0.04629	0.06293	0.05596	0.11054	0.08495	0.22421
0.04095	0.03039	0.04262	0.06325	0.06159	0.1109	0.08657	0.22485
0.03828	0.03052	0.04729	0.06354	0.05758	0.11151	0.0889	0.22624
0.05163	0.0306	0.05229	0.06385	0.06159	0.112	0.08628	0.22812
0.04595	0.03074	0.05363	0.06405	0.05992	0.1126	0.09157	0.22922
0.04128	0.03092	0.05129	0.06428	0.06092	0.11315	0.08957	0.2307
0.05396	0.03107	0.05696	0.06456	0.05792	0.1137	0.09224	0.23368
0.05096	0.03125	0.05925	0.06492	0.06359	0.11454	0.09324	0.23636
0.04896	0.03138	0.05925	0.06528	0.06326	0.1153	0.09424	0.23848
0.0573	0.03151	0.05925	0.06561	0.05825	0.11609	0.09825	0.24107
0.05296	0.03172	0.06459	0.0661	0.06359	0.11696	0.10292	0.24379
0.05992	0.0319	0.06659	0.06642	0.06493	0.11791	0.09725	0.2453
0.0563	0.03208	0.07026	0.06676	0.07093	0.11864	0.10258	0.24803
0.05563	0.03231	0.0686	0.06703	0.06426	0.11934	0.10325	0.25092
0.05925	0.0325	0.07026	0.06739	0.07327	0.1203	0.10492	0.25342
0.06459	0.03267	0.07394	0.06786	0.07127	0.12086	0.10492	0.2558
0.06192	0.03284	0.07193	0.06831	0.0746	0.12165	0.11093	0.25707
0.06626	0.03299	0.07327	0.06867	0.06993	0.1225	0.11193	0.25873
0.06659	0.03319	0.08061	0.06889	0.07127	0.12323	0.10959	0.26079
0.0716	0.03334	0.07861	0.06906	0.07761	0.12395	0.11755	0.26427
0.07293	0.0336	0.08461	0.06943	0.08228	0.12463	0.11588	0.26777
0.07293	0.03386	0.08757	0.06981	0.0766	0.12574	0.11522	0.27054
0.07527	0.03409	0.08824	0.07012	0.07927	0.12653	0.11722	0.27235
0.07627	0.03434	0.08757	0.07033	0.07927	0.12729	0.12122	0.2744
0.07727	0.03451	0.09391	0.07058	0.08361	0.12787	0.12189	0.27618
0.08028	0.03469	0.09791	0.07087	0.0869	0.12886	0.12589	0.27771
0.08495	0.03488	0.09191	0.07113	0.08161	0.12945	0.12423	0.27991
0.08495	0.03511	0.09624	0.07155	0.08528	0.13022	0.12923	0.28185
0.08495	0.03534	0.10258	0.07192	0.08361	0.13086	0.13023	0.28371
0.09024	0.03557	0.10626	0.07238	0.08495	0.13147	0.13257	0.28594
0.09224	0.03577	0.10158	0.07272	0.09124	0.1324	0.1349	0.28712
0.09558	0.03604	0.11059	0.07329	0.09224	0.13333	0.13357	0.28838
0.09758	0.03626	0.10292	0.07384	0.09591	0.13412	0.13991	0.28987
0.09992	0.0365	0.11226	0.07432	0.09725	0.13498	0.13891	0.29223
0.09925	0.03671	0.11588	0.07487	0.09791	0.13591	0.14124	0.29471
0.10292	0.03692	0.11655	0.07522	0.10325	0.13694	0.14225	0.29884
0.10192	0.03726	0.11655	0.0756	0.10425	0.13789	0.14487	0.30233
0.10492	0.03752	0.12289	0.07601	0.10192	0.13889	0.14687	0.30564
0.10325	0.03782	0.12623	0.07649	0.10659	0.13963	0.15021	0.30781
0.10525	0.03813	0.12456	0.0769	0.10025	0.14035	0.15421	0.30954
0.1146	0.03842	0.12756	0.07743	0.10258	0.14147	0.14987	0.31172
0.11689	0.03876	0.13257	0.07787	0.10258	0.14274	0.15521	0.31318
0.12256	0.0391	0.13858	0.07842	0.10425	0.14383	0.15621	0.3153
0.12122	0.03948	0.14024	0.07893	0.11159	0.14499	0.16088	0.31755
0.12323	0.03978	0.14487	0.0797	0.10892	0.14596	0.15788	0.32052
0.1279	0.04013	0.14654	0.08042	0.11059	0.14707	0.16088	0.32315
0.1309	0.04033	0.15187	0.08081	0.11555	0.14799	0.16489	0.32715
0.13791	0.04068	0.15688	0.08142	0.11855	0.14948	0.16856	0.33063
0.13958	0.04096	0.15955	0.08249	0.11426	0.1507	0.1719	0.33423
0.13858	0.04132	0.16222	0.08339	0.12523	0.1524	0.17352	0.33727
0.14754	0.04167	0.16522	0.08414	0.12022	0.15394	0.17552	0.33949
0.14024	0.04205	0.17223	0.08475	0.12589	0.15574	0.18052	0.34149
0.1472	0.04235	0.17886	0.08568	0.12256	0.15736	0.18253	0.34467
0.15354	0.04275	0.17919	0.08626	0.12389	0.15885	0.18119	0.34695
0.15621	0.04315	0.18119	0.08715	0.13324	0.16036	0.1862	0.34884
0.15788	0.04347	0.18887	0.08802	0.13657	0.16195	0.18686	0.35286
0.16589	0.04387	0.19587	0.08904	0.1349	0.16339	0.18787	0.35636
0.16923	0.04431	0.19487	0.08993	0.13324	0.16558	0.19754	0.36055
0.17652	0.04465	0.20055	0.091	0.13724	0.16755	0.19687	0.36396
0.17919	0.04507	0.20784	0.092	0.1482	0.1688	0.20217	0.36777
0.18219	0.04544	0.20884	0.09308	0.15755	0.17042	0.2025	0.37119
0.18853	0.04589	0.21318	0.09414	0.14754	0.17199	0.21051	0.37512
0.19254	0.04618	0.22219	0.09544	0.15821	0.17347	0.21251	0.37824
0.19754	0.04652	0.22486	0.09641	0.14024	0.17515	0.21118	0.38205
0.2055	0.04695	0.23382	0.09777	0.15855	0.17712	0.21651	0.38624
0.20984	0.0473	0.23849	0.09893	0.15655	0.17893	0.22552	0.38956
0.20484	0.04762	0.23749	0.10054	0.16756	0.18094	0.22452	0.39291
0.21284	0.048	0.24783	0.10175	0.16055	0.18304	0.23048	0.3967
0.21651	0.04833	0.2525	0.10257	0.16355	0.18572	0.23382	0.39974
0.21985	0.04865	0.25851	0.10374	0.17385	0.18838	0.23482	0.40302
0.22853	0.04896	0.26314	0.10485	0.17519	0.1911	0.24016	0.40655
0.23248	0.04927	0.26981	0.10609	0.17852	0.19311	0.2465	0.40995
0.24183	0.04963	0.27315	0.10743	0.18453	0.1951	0.24283	0.41326
0.24917	0.04992	0.27882	0.10883	0.18453	0.1973	0.2475	0.4167
0.24817	0.05025	0.28683	0.11003	0.18353	0.19933	0.25484	0.42036
0.25451	0.0506	0.29178	0.11091	0.1872	0.20177	0.26314	0.42329
0.25851	0.05095	0.29579	0.11234	0.18853	0.20426	0.2618	0.42683
0.26614	0.0514	0.3028	0.11368	0.1932	0.20664	0.26681	0.43107
0.28015	0.05183	0.3108	0.11535	0.19721	0.20854	0.27148	0.43546
0.28382	0.05219	0.31743	0.11642	0.19788	0.21089	0.27615	0.43809
0.28282	0.05267	0.32444	0.11791	0.21385	0.21342	0.27715	0.44159
0.29112	0.05316	0.33145	0.11974	0.21184	0.21634	0.28216	0.44537
0.29145	0.05357	0.33945	0.12157	0.21351	0.21935	0.28716	0.45065
0.3018	0.05394	0.34908	0.12354	0.22386	0.22252	0.28912	0.45483
0.31448	0.05455	0.35476	0.12547	0.22552	0.22537	0.29979	0.45947
0.31843	0.05513	0.36043	0.12748	0.23248	0.22887	0.30513	0.46441
0.33044	0.05577	0.37044	0.1292	0.23148	0.23199	0.30847	0.46976
0.33512	0.05625	0.37907	0.13133	0.23782	0.23457	0.31347	0.47554
0.33979	0.05676	0.38808	0.13282	0.2445	0.23796	0.3181	0.48299
0.34942	0.05732	0.39609	0.13458	0.24883	0.24145	0.3231	0.49054
0.35743	0.05788	0.40471	0.13625	0.25384	0.24515	0.32911	0.4965
0.36677	0.05849	0.41372	0.13792	0.26681	0.24793	0.33712	0.50247
0.3764	0.05895	0.42974	0.1396	0.2618	0.25142	0.34413	0.50859
0.38174	0.05958	0.43074	0.14142	0.26814	0.25546	0.34312	0.51486
0.39075	0.06013	0.44671	0.14316	0.26881	0.25926	0.35509	0.52103
0.40142	0.06067	0.45972	0.14542	0.27882	0.26306	0.36009	0.52868
0.40905	0.06132	0.46568	0.14757	0.28182	0.26673	0.36443	0.53609
0.41839	0.06196	0.47669	0.14969	0.29279	0.27063	0.36977	0.54193
0.43107	0.06261	0.492	0.15175	0.29445	0.27509	0.37506	0.54934
0.44471	0.06329	0.50301	0.15345	0.30046	0.28052	0.38441	0.55741
0.45238	0.06374	0.51202	0.15573	0.30713	0.285	0.39008	0.56615
0.46301	0.06435	0.52832	0.15774	0.3171	0.2897	0.39642	0.57422
0.47169	0.06506	0.54234	0.16051	0.32477	0.29443	0.40705	0.58286
0.48303	0.06572	0.5513	0.16304	0.33445	0.2973	0.41205	0.59272
0.49467	0.06645	0.56264	0.16482	0.34575	0.30138	0.41739	0.60355
0.50534	0.06711	0.58395	0.16687	0.35042	0.30573	0.42674	0.61017
0.52031	0.06788	0.5963	0.16921	0.35576	0.31086	0.43141	0.61872
0.52966	0.0685	0.60626	0.17107	0.36944	0.31514	0.44137	0.6275
0.54133	0.06919	0.62027	0.17348	0.37411	0.31913	0.44704	0.63778
0.56131	0.06986	0.62962	0.17583	0.3804	0.32388	0.45472	0.64718
0.57365	0.07049	0.64559	0.17783	0.38774	0.32926	0.46301	0.65779
0.58395	0.07118	0.66456	0.18039	0.39709	0.33447	0.46969	0.6686
0.59897	0.07179	0.67991	0.18293	0.40438	0.33952	0.48203	0.67999
0.6146	0.07246	0.69554	0.18555	0.41839	0.34417	0.48804	0.68985
0.63129	0.07319	0.71223	0.18812	0.42073	0.34903	0.496	0.70026
0.64826	0.07398	0.72987	0.19109	0.43236	0.35289	0.50401	0.71071
0.65793	0.07477	0.74655	0.19306	0.43937	0.35738	0.51602	0.72139
0.67357	0.07553	0.76552	0.19583	0.44938	0.36162	0.52732	0.72881
0.68592	0.07634	0.7865	0.19848	0.45505	0.36602	0.53666	0.73888
0.70622	0.07721	0.80781	0.20157	0.47169	0.37029	0.544	0.74911
0.72953	0.07796	0.8305	0.20367	0.48437	0.3754	0.55363	0.76065
0.74455	0.07872	0.8478	0.20676	0.48771	0.37973	0.56731	0.77167
0.76519	0.07958	0.87111	0.20973	0.50601	0.38501	0.57628	0.7821
0.78249	0.08046	0.89776	0.21292	0.50801	0.39052	0.59163	0.79371
0.80018	0.0815	0.91111	0.21628	0.53166	0.3957	0.6013	0.80466
0.82482	0.08243	0.94076	0.21939	0.53666	0.40226	0.6116	0.81575
0.84513	0.08352	0.9664	0.22261	0.55931	0.40829	0.62995	0.82842
0.86477	0.08457	0.98738	0.22619	0.55864	0.41437	0.63991	0.84053
0.88613	0.08554	1.01402	0.22869	0.57332	0.42119	0.65426	0.85366
0.9091	0.08659	1.04201	0.23174	0.58161	0.42734	0.66523	0.86553
0.93442	0.08762	1.06732	0.235	0.59296	0.4335	0.68858	0.87706
0.96407	0.08866	1.0963	0.23827	0.61694	0.44033	0.69588	0.8894
0.9787	0.08941	1.12962	0.24148	0.62027	0.44638	0.71323	0.90202
1.00673	0.09044	1.16128	0.24517	0.63758	0.45321	0.73554	0.91084
1.03371	0.09153	1.18492	0.24814	0.64692	0.46011	0.75218	0.92203
1.06036	0.09267	1.21857	0.25102	0.65927	0.46753	0.76853	0.93337
1.08767	0.09382	1.2549	0.25502	0.68124	0.47606	0.7885	0.94635
1.11866	0.09485	1.28822	0.25849	0.69588	0.48265	0.80781	0.96013
1.14697	0.09572	1.32154	0.26227	0.70923	0.48993	0.82349	0.97374
1.17896	0.09658	1.35186	0.2658	0.72953	0.49518	0.84613	0.98784
1.2119	0.09748	1.3848	0.26961	0.74655	0.50161	0.87144	1.0027
1.24289	0.09847	1.42713	0.2737	0.75885	0.50701	0.88746	1.01644
1.27254	0.09965	1.46245	0.27751	0.77849	0.51227	0.91511	1.02955
1.30752	0.10088	1.49839	0.28142	0.79417	0.51798	0.93875	1.04379
1.33851	0.10205	1.54039	0.28578	0.81481	0.52515	0.9674	1.05837
1.38084	0.10325	1.58105	0.28945	0.8325	0.53115	0.98971	1.07353
1.41645	0.10459	1.62067	0.29241	0.85314	0.53873	1.01769	1.08896
1.44977	0.1059	1.66099	0.29629	0.87478	0.54693	1.04334	1.10476
1.48743	0.10683	1.70795	0.30008	0.8918	0.5543	1.06665	1.1208
1.52042	0.10805	1.75295	0.30449	0.91678	0.56214	1.10064	1.13631
1.56103	0.10927	1.80024	0.30905	0.93475	0.5711	1.13363	1.15188
1.60903	0.11066	1.84619	0.31385	0.96206	0.57949	1.16495	1.16679
1.64164	0.11199	1.89553	0.31702	0.97903	0.58791	1.19326	1.18356
1.69198	0.1134	1.94348	0.32075	0.99739	0.59559	1.22491	1.19491
1.73626	0.11443	1.99177	0.32491	1.02604	0.60388	1.26024	1.20978
1.77626	0.11602	2.04278	0.32897	1.05001	0.61285	1.29256	1.22582
1.83022	0.11696	2.09941	0.33267	1.07232	0.61867	1.33017	1.24424
1.86254	0.11824	2.15771	0.33689	1.09301	0.62616	1.36249	1.26156
1.91617	0.11933	2.21663	0.34069	1.12662	0.63388	1.40315	1.27949
1.9708	0.12043	2.27331	0.34451	1.15031	0.64233	1.44276	1.29636
2.02109	0.12155	2.33556	0.34916	1.17295	0.64982	1.48876	1.31336
2.07538	0.12279	2.39653	0.3531	1.20527	0.6584	1.52804	1.32875
2.12606	0.12405	2.46084	0.35762	1.21157	0.6675	1.57138	1.34349
2.18235	0.1252	2.52982	0.36271	1.25557	0.67672	1.61332	1.35768
2.24828	0.12652	2.59307	0.36622	1.28054	0.68564	1.65532	1.37409
2.31059	0.12796	2.66138	0.3708	1.32321	0.69404	1.70161	1.39042
2.36788	0.12896	2.73465	0.37547	1.35948	0.70281	1.74894	1.40652
2.42518	0.13006	2.80597	0.37943	1.3848	0.7104	1.80257	1.42389
2.48915	0.13142	2.8829	0.38428	1.43313	0.71891	1.84586	1.44179
2.55847	0.1326	2.96156	0.38947	1.45745	0.7271	1.90015	1.45997
2.6274	0.13404	3.02315	0.39497	1.49277	0.73581	1.95283	1.4771
2.69504	0.13564	3.10848	0.39893	1.54006	0.74535	2.00479	1.49653
2.75467	0.1372	3.19342	0.40411	1.57037	0.7514	2.06709	1.51589
2.83328	0.13905	3.2777	0.40939	1.618	0.75999	2.12873	1.53491
2.91089	0.14051	3.36565	0.41475	1.66133	0.76942	2.17702	1.55535
2.98387	0.14165	3.4609	0.4206	1.69498	0.77923	2.24199	1.57425
3.07449	0.14311	3.55318	0.4249	1.7366	0.78896	2.30691	1.59447
3.14008	0.14455	3.64547	0.42994	1.77859	0.80019	2.37389	1.61254
3.23003	0.14565	3.73976	0.43508	1.82455	0.8102	2.44087	1.63174
3.32532	0.1472	3.84669	0.44057	1.87317	0.82072	2.5035	1.65104
3.40927	0.14853	3.94793	0.44603	1.9165	0.82823	2.57277	1.67347
3.50456	0.14991	4.04556	0.45124	1.97013	0.8386	2.64775	1.69292
3.5855	0.15136	4.16116	0.45673	2.01608	0.84949	2.72369	1.70745
3.68146	0.15302	4.27042	0.46195	2.06342	0.86051	2.80296	1.72608
3.77938	0.1544	4.37767	0.46599	2.11438	0.87172	2.87361	1.74507
3.88234	0.15575	4.47897	0.47132	2.17101	0.88253	2.95322	1.76535
3.98226	0.15721	4.59123	0.47703	2.22097	0.89322	3.03716	1.78553
4.07454	0.15857	4.71184	0.48321	2.26864	0.9047	3.12645	1.79973
4.17351	0.16019	4.83578	0.48891	2.33027	0.91708	3.21173	1.81848
4.29206	0.16156	4.96167	0.49464	2.38123	0.9288	3.30535	1.83775
4.38335	0.16291	5.08795	0.5	2.43953	0.94053	3.38196	1.85897
4.50796	0.16427	5.21885	0.50623	2.49416	0.95274	3.48125	1.87969
4.61488	0.16561	5.3498	0.51147	2.56047	0.96167	3.57916	1.9008
4.73915	0.16711	5.49171	0.51584	2.61576	0.97342	3.67679	1.92215
4.85909	0.1685	5.62294	0.52048	2.67473	0.9855	3.77404	1.94327
4.99132	0.16994	5.76252	0.52622	2.75067	0.99753	3.86566	1.96385
5.11827	0.1725	5.9091	0.53109	2.81264	1.01041	3.96862	1.98581
5.23053	0.1746	6.05635	0.53663	2.88057	1.02266	4.07721	2.00635
5.3661	0.17612	6.20694	0.5414	2.94354	1.03562	4.18614	2.02833
5.49867	0.17809	6.3582	0.54573	3.02086	1.04804	4.30207	2.05017
5.6403	0.17991	6.48209	0.55096	3.09046	1.06106	4.39536	2.07173
5.78354	0.18167	6.64269	0.55637	3.16344	1.07396	4.5143	2.09265
5.9021	0.1836	6.80291	0.56161	3.24004	1.087	4.63356	2.11404
6.04968	0.18539	6.96646	0.56701	3.32065	1.09947	4.75178	2.13458
6.19827	0.18716	7.13006	0.57275	3.38763	1.11314	4.87839	2.15656
6.34852	0.18932	7.29728	0.57814	3.4619	1.12259	5.00534	2.17818
6.50874	0.19124	7.47218	0.58398	3.55519	1.13502	5.11727	2.20076
6.64269	0.19334	7.64908	0.59019	3.63046	1.14748	5.24817	2.22361
6.80257	0.19497	7.82198	0.59623	3.71474	1.16125	5.38278	2.23896
6.9718	0.19703	8.01051	0.602	3.8117	1.17444	5.52069	2.2592
7.1354	0.19898	8.19109	0.6062	3.89598	1.18457	5.65994	2.27984
7.30463	0.20088	8.37762	0.6117	3.98092	1.19709	5.78354	2.30222
7.44887	0.20291	8.56953	0.61719	4.07188	1.21255	5.92345	2.32562
7.61943	0.20514	8.75773	0.62309	4.17251	1.23066	6.07399	2.34727
7.80129	0.20744	8.95828	0.62918	4.27075	1.24905	6.22091	2.36243
7.98253	0.20902	9.1512	0.63489	4.35737	1.26622	6.37951	2.37969
8.16377	0.21087	9.32343	0.63897	4.47764	1.2777	6.53343	2.39728
8.32132	0.21302	9.5306	0.64453	4.56592	1.29188	6.66867	2.41467
8.5069	0.21495	9.73615	0.65004	4.6645	1.30692	6.83422	2.43273
8.69181	0.2171	9.93936	0.65621	4.76947	1.32216	6.99082	2.45335
8.89631	0.21877	10.1599	0.66191	4.88373	1.33708	7.15704	2.47426
9.08923	0.22063	10.3711	0.66597	4.99232	1.35178	7.32093	2.49649
9.25779	0.22276	10.5913	0.67076	5.09429	1.36582	7.46751	2.51745
9.46267	0.22466	10.8145	0.67608	5.22018	1.38319	7.63807	2.53777
9.66221	0.22645	11.0357	0.68163	5.33111	1.39992	7.8093	2.55827
9.8711	0.2285	11.2686	0.68737	5.4417	1.41252	7.99054	2.57789
10.086	0.23038	11.4968	0.69369	5.56431	1.42915	8.16611	2.59735
10.2552	0.23269	11.725	0.70027	5.69559	1.44594	8.32666	2.6115
10.4754	0.2345	11.9618	0.70721	5.80685	1.46528	8.51257	2.62997
10.6949	0.23647	12.1987	0.71377	5.93375	1.48282	8.6991	2.64871
10.9118	0.2387	12.4459	0.7206	6.0727	1.50173	8.88768	2.668
11.143	0.24082	12.6497	0.72753	6.1956	1.51634	9.07955	2.6862
11.3299	0.24311	12.8876	0.73409	6.32521	1.53046	9.27542	2.70932
11.5584	0.24551	13.1431	0.73885	6.44648	1.54818	9.43636	2.72358
11.7959	0.24799	13.3903	0.74503	6.60303	1.56862	9.6452	2.74218
12.0235	0.25042	13.6392	0.75136	6.72964	1.58658	9.84541	2.76264
12.2703	0.25231	13.9017	0.7578	6.86154	1.59984	10.05	2.78272
12.4682	0.2544	14.1602	0.7647	7.02047	1.61684	10.2555	2.80066
12.7034	0.25682	14.4207	0.77132	7.15637	1.63437	10.4344	2.82017
12.9499	0.25907	14.7279	0.77737	7.29895	1.65328	10.6529	2.84093
13.2004	0.26153	14.949	0.78365	7.43686	1.67291	10.8621	2.86063
13.4423	0.26394	15.2109	0.78992	7.60675	1.69323	11.0847	2.87804
13.6611	0.26657	15.4848	0.79669	7.75234	1.71177	11.3106	2.89577
13.916	0.26842	15.7552	0.80334	7.89792	1.73091	11.5004	2.91317
14.1738	0.27083	16.0281	0.80972	8.07382	1.75236	11.731	2.92476
14.432	0.27339	16.3022	0.81593	8.22674	1.77298	11.9532	2.9447
14.6965	0.27598	16.5751	0.82101	8.37728	1.79351	12.1924	2.97241
14.9108	0.27786			8.53922	1.81333	12.4182	2.9816
15.1839	0.27995			8.71945	1.83123	12.6614	2.99193
15.4488	0.28168			8.88201	1.84813	12.8613	3.01793
15.7219	0.28397			9.04456	1.86809	13.0998	3.04175
15.9948	0.28675			9.23314	1.885	13.349	3.06074
16.2213	0.28865			9.40404	1.9011	13.5719	3.07771
16.4994	0.29071			9.56826	1.92062	13.8317	3.09097
16.7786	0.29323			9.74282	1.9396	14.0476	3.10679
17.0591	0.29555			9.94337	1.95937	14.3051	3.1207
17.348	0.29857			10.1189	1.98112	14.5643	3.13838
17.6341	0.3009			10.3028	1.99992	14.8235	3.15491
				10.5144	2.01923	15.0869	3.17063
				10.6959	2.03922	15.3485	3.18161
				10.8881	2.05289
				11.0744	2.07161
				11.2986	2.0905
				11.4931	2.11048
				11.6853	2.13006
				11.9188	2.14447
				12.1144	2.16047
				12.3226	2.18001
				12.5278	2.19752
				12.766	2.21345
				12.9769	2.22775
				13.1847	2.24608
				13.4393	2.26042
				13.6575	2.27776
				13.878	2.29562
				14.0986	2.31466
				14.3554	2.32784
				14.5806	2.34527
				14.8125	2.36276
				15.076	2.38299
				15.3105	2.39722
				15.5453	2.41513
				15.8235	2.42829

## Sheet: Fig. 3a
	1:3		1:4		1:5		1:6
Stress(kPa)	∆C/C0	Stress(kPa)	∆C/C0	Stress(kPa)	∆C/C0	Stress(kPa)	∆C/C0
0	0	0	0	0	0	0	0
0.02631	0.02277	0.02894	0.02512	0.04195	0.08023	0.05992	0.10006
0.02398	0.02485	0.03094	0.02941	0.04328	0.08358	0.06526	0.10214
0.02398	0.02892	0.03628	0.03512	0.05129	0.08807	0.06025	0.1042
0.02431	0.03239	0.03094	0.04193	0.05396	0.0919	0.06793	0.10577
0.02398	0.03525	0.03361	0.04702	0.04695	0.09638	0.07193	0.10652
0.02927	0.04005	0.03027	0.05177	0.04762	0.10033	0.0686	0.10765
0.0306	0.04327	0.03294	0.05628	0.04762	0.10248	0.07494	0.10944
0.0296	0.04727	0.03094	0.06209	0.04929	0.10483	0.07527	0.10953
0.03094	0.05086	0.04262	0.06854	0.04896	0.10844	0.0736	0.11023
0.03861	0.05475	0.03895	0.076	0.04962	0.11235	0.07527	0.11145
0.02331	0.05881	0.04162	0.0815	0.05296	0.11536	0.07927	0.11588
0.03127	0.06259	0.04295	0.08706	0.04796	0.11812	0.07794	0.12148
0.03995	0.06552	0.05062	0.09934	0.05062	0.12129	0.07594	0.12542
0.04195	0.07128	0.04762	0.1127	0.0543	0.12453	0.08061	0.12795
0.03694	0.0765	0.04629	0.11783	0.05596	0.12798	0.08495	0.13235
0.04095	0.08167	0.04262	0.12343	0.06159	0.13163	0.08657	0.1356
0.03828	0.08621	0.04729	0.12868	0.05758	0.13781	0.0889	0.14261
0.05163	0.08912	0.05229	0.13404	0.06159	0.14288	0.08628	0.15215
0.04595	0.09394	0.05363	0.13774	0.05992	0.14897	0.09157	0.15769
0.04128	0.1002	0.05129	0.14176	0.06092	0.15463	0.08957	0.16517
0.05396	0.1057	0.05696	0.14663	0.05792	0.1602	0.09224	0.18019
0.05096	0.11211	0.05925	0.15302	0.06359	0.16881	0.09324	0.19372
0.04896	0.1168	0.05925	0.15947	0.06326	0.17653	0.09424	0.20445
0.0573	0.1214	0.05925	0.16534	0.05825	0.18458	0.09825	0.21754
0.05296	0.12887	0.06459	0.17408	0.06359	0.19343	0.10292	0.23124
0.05992	0.13534	0.06659	0.17967	0.06493	0.20316	0.09725	0.23886
0.0563	0.14172	0.07026	0.18576	0.07093	0.21063	0.10258	0.25268
0.05563	0.14989	0.0686	0.19059	0.06426	0.21771	0.10325	0.26729
0.05925	0.15663	0.07026	0.197	0.07327	0.22755	0.10492	0.27987
0.06459	0.16246	0.07394	0.20527	0.07127	0.23327	0.10492	0.29191
0.06192	0.16884	0.07193	0.21324	0.0746	0.24132	0.11093	0.29832
0.06626	0.17413	0.07327	0.21973	0.06993	0.24998	0.11193	0.30671
0.06659	0.18106	0.08061	0.22359	0.07127	0.25748	0.10959	0.31712
0.0716	0.18663	0.07861	0.22662	0.07761	0.26478	0.11755	0.33472
0.07293	0.19566	0.08461	0.23318	0.08228	0.27177	0.11588	0.35237
0.07293	0.20506	0.08757	0.24001	0.0766	0.28303	0.11522	0.36636
0.07527	0.21326	0.08824	0.24554	0.07927	0.29114	0.11722	0.37552
0.07627	0.22218	0.08757	0.24915	0.07927	0.29884	0.12122	0.38585
0.07727	0.22827	0.09391	0.2537	0.08361	0.30484	0.12189	0.39485
0.08028	0.23464	0.09791	0.25884	0.0869	0.31494	0.12589	0.40256
0.08495	0.24123	0.09191	0.26346	0.08161	0.32088	0.12423	0.41367
0.08495	0.24948	0.09624	0.27093	0.08528	0.32882	0.12923	0.42349
0.08495	0.25773	0.10258	0.27752	0.08361	0.33528	0.13023	0.43286
0.09024	0.26593	0.10626	0.28567	0.08495	0.34157	0.13257	0.44414
0.09224	0.27311	0.10158	0.29159	0.09124	0.35103	0.1349	0.45011
0.09558	0.28251	0.11059	0.30181	0.09224	0.36046	0.13357	0.45645
0.09758	0.29026	0.10292	0.31161	0.09591	0.36855	0.13991	0.464
0.09992	0.29906	0.11226	0.32003	0.09725	0.37735	0.13891	0.4759
0.09925	0.30627	0.11588	0.32988	0.09791	0.38688	0.14124	0.48844
0.10292	0.31402	0.11655	0.33602	0.10325	0.3973	0.14225	0.50929
0.10192	0.32594	0.11655	0.3428	0.10425	0.407	0.14487	0.52693
0.10492	0.33506	0.12289	0.35	0.10192	0.41728	0.14687	0.54362
0.10325	0.34574	0.12623	0.35867	0.10659	0.42474	0.15021	0.5546
0.10525	0.35681	0.12456	0.36598	0.10025	0.43213	0.15421	0.56333
0.1146	0.36727	0.12756	0.37529	0.10258	0.44355	0.14987	0.57432
0.11689	0.37951	0.13257	0.38315	0.10258	0.45649	0.15521	0.58172
0.12256	0.39145	0.13858	0.39289	0.10425	0.46768	0.15621	0.59242
0.12122	0.40482	0.14024	0.40196	0.11159	0.47944	0.16088	0.6038
0.12323	0.41557	0.14487	0.41566	0.10892	0.48938	0.15788	0.61878
0.1279	0.42805	0.14654	0.42847	0.11059	0.5007	0.16088	0.63208
0.1309	0.43515	0.15187	0.43536	0.11555	0.51008	0.16489	0.65229
0.13791	0.44754	0.15688	0.44618	0.11855	0.52529	0.16856	0.66985
0.13958	0.45763	0.15955	0.46519	0.11426	0.5377	0.1719	0.68805
0.13858	0.47041	0.16222	0.4811	0.12523	0.55505	0.17352	0.70336
0.14754	0.48303	0.16522	0.49444	0.12022	0.57085	0.17552	0.71458
0.14024	0.49632	0.17223	0.50535	0.12589	0.58922	0.18052	0.7247
0.1472	0.50729	0.17886	0.52193	0.12256	0.60571	0.18253	0.74074
0.15354	0.52149	0.17919	0.53208	0.12389	0.62091	0.18119	0.75226
0.15621	0.53563	0.18119	0.54801	0.13324	0.63633	0.1862	0.76183
0.15788	0.54713	0.18887	0.5634	0.13657	0.6525	0.18686	0.78215
0.16589	0.56118	0.19587	0.5815	0.1349	0.66728	0.18787	0.79982
0.16923	0.57672	0.19487	0.59727	0.13324	0.68961	0.19754	0.82095
0.17652	0.58906	0.20055	0.61625	0.13724	0.70964	0.19687	0.83821
0.17919	0.60376	0.20784	0.63418	0.1482	0.72241	0.20217	0.85744
0.18219	0.61717	0.20884	0.65322	0.15755	0.73895	0.2025	0.87471
0.18853	0.63327	0.21318	0.67216	0.14754	0.75501	0.21051	0.89456
0.19254	0.64357	0.22219	0.69528	0.15821	0.77009	0.21251	0.91031
0.19754	0.65558	0.22486	0.71246	0.14024	0.78727	0.21118	0.92953
0.2055	0.6707	0.23382	0.7366	0.15855	0.80734	0.21651	0.95071
0.20984	0.68331	0.23849	0.75723	0.15655	0.8258	0.22552	0.96745
0.20484	0.69471	0.23749	0.7857	0.16756	0.84629	0.22452	0.98441
0.21284	0.70828	0.24783	0.80728	0.16055	0.86773	0.23048	1.00353
0.21651	0.71978	0.2525	0.82181	0.16355	0.89506	0.23382	1.0189
0.21985	0.73119	0.25851	0.84268	0.17385	0.92226	0.23482	1.03546
0.22853	0.74248	0.26314	0.86242	0.17519	0.95002	0.24016	1.05326
0.23248	0.75323	0.26981	0.88439	0.17852	0.97052	0.2465	1.07047
0.24183	0.76631	0.27315	0.90813	0.18453	0.99083	0.24283	1.08716
0.24917	0.77657	0.27882	0.93306	0.18453	1.01321	0.2475	1.10454
0.24817	0.78812	0.28683	0.95432	0.18353	1.03397	0.25484	1.12302
0.25451	0.80057	0.29178	0.96991	0.1872	1.05886	0.26314	1.13783
0.25851	0.8131	0.29579	0.99536	0.18853	1.08429	0.2618	1.1557
0.26614	0.82925	0.3028	1.01917	0.1932	1.10857	0.26681	1.17713
0.28015	0.84441	0.3108	1.04888	0.19721	1.12795	0.27148	1.19927
0.28382	0.85722	0.31743	1.06792	0.19788	1.1519	0.27615	1.21255
0.28282	0.87433	0.32444	1.09428	0.21385	1.17777	0.27715	1.23026
0.29112	0.89173	0.33145	1.12687	0.21184	1.20751	0.28216	1.24936
0.29145	0.90641	0.33945	1.15924	0.21351	1.23827	0.28716	1.27604
0.3018	0.91941	0.34908	1.19437	0.22386	1.27059	0.28912	1.29712
0.31448	0.94112	0.35476	1.22865	0.22552	1.29965	0.29979	1.32055
0.31843	0.96179	0.36043	1.26432	0.23248	1.33544	0.30513	1.34553
0.33044	0.98481	0.37044	1.29481	0.23148	1.36724	0.30847	1.37251
0.33512	1.00163	0.37907	1.33274	0.23782	1.39353	0.31347	1.40173
0.33979	1.01986	0.38808	1.35917	0.2445	1.42811	0.3181	1.43935
0.34942	1.03983	0.39609	1.39032	0.24883	1.46377	0.3231	1.47747
0.35743	1.05964	0.40471	1.42011	0.25384	1.50152	0.32911	1.5076
0.36677	1.08167	0.41372	1.4497	0.26681	1.52987	0.33712	1.53774
0.3764	1.09774	0.42974	1.4795	0.2618	1.56547	0.34413	1.56865
0.38174	1.12028	0.43074	1.51194	0.26814	1.60677	0.34312	1.60031
0.39075	1.14001	0.44671	1.54274	0.26881	1.64553	0.35509	1.63147
0.40142	1.15916	0.45972	1.583	0.27882	1.68428	0.36009	1.67008
0.40905	1.18225	0.46568	1.62119	0.28182	1.72169	0.36443	1.70754
0.41839	1.20484	0.47669	1.65872	0.29279	1.76154	0.36977	1.73702
0.43107	1.22819	0.492	1.69542	0.29445	1.80699	0.37506	1.77445
0.44471	1.25218	0.50301	1.72563	0.30046	1.86247	0.38441	1.81521
0.45238	1.26843	0.51202	1.76613	0.30713	1.90816	0.39008	1.85934
0.46301	1.2901	0.52832	1.80181	0.3171	1.95615	0.39642	1.90011
0.47169	1.3154	0.54234	1.85092	0.32477	2.00441	0.40705	1.94372
0.48303	1.33892	0.5513	1.89583	0.33445	2.03368	0.41205	1.99354
0.49467	1.36465	0.56264	1.92757	0.34575	2.07526	0.41739	2.04821
0.50534	1.38809	0.58395	1.96385	0.35042	2.11972	0.42674	2.08168
0.52031	1.41577	0.5963	2.00558	0.35576	2.172	0.43141	2.12482
0.52966	1.43777	0.60626	2.03854	0.36944	2.21574	0.44137	2.16921
0.54133	1.46221	0.62027	2.08142	0.37411	2.25642	0.44704	2.22112
0.56131	1.48627	0.62962	2.12318	0.3804	2.30492	0.45472	2.26857
0.57365	1.50862	0.64559	2.15856	0.38774	2.35979	0.46301	2.32219
0.58395	1.53294	0.66456	2.20403	0.39709	2.41293	0.46969	2.37676
0.59897	1.55488	0.67991	2.24918	0.40438	2.46447	0.48203	2.4343
0.6146	1.57857	0.69554	2.29579	0.41839	2.51193	0.48804	2.48409
0.63129	1.60468	0.71223	2.3414	0.42073	2.56153	0.496	2.53666
0.64826	1.63272	0.72987	2.39412	0.43236	2.60092	0.50401	2.58943
0.65793	1.66083	0.74655	2.42917	0.43937	2.64673	0.51602	2.64336
0.67357	1.68797	0.76552	2.47824	0.44938	2.69003	0.52732	2.68085
0.68592	1.7168	0.7865	2.52536	0.45505	2.73489	0.53666	2.73171
0.70622	1.7477	0.80781	2.5803	0.47169	2.7785	0.544	2.78336
0.72953	1.77443	0.8305	2.61764	0.48437	2.83066	0.55363	2.84165
0.74455	1.80134	0.8478	2.67245	0.48771	2.8748	0.56731	2.89731
0.76519	1.83204	0.87111	2.72529	0.50601	2.92864	0.57628	2.94998
0.78249	1.86318	0.89776	2.78195	0.50801	2.98492	0.59163	3.00862
0.80018	1.90036	0.91111	2.84151	0.53166	3.03772	0.6013	3.06396
0.82482	1.93342	0.94076	2.89686	0.53666	3.10472	0.6116	3.11997
0.84513	1.97227	0.9664	2.95396	0.55931	3.16621	0.62995	3.18393
0.86477	2.00951	0.98738	3.01755	0.55864	3.2283	0.63991	3.24509
0.88613	2.04402	1.01402	3.06206	0.57332	3.29786	0.65426	3.31139
0.9091	2.08152	1.04201	3.11607	0.58161	3.36059	0.66523	3.37134
0.93442	2.11816	1.06732	3.17416	0.59296	3.42349	0.68858	3.42957
0.96407	2.15532	1.0963	3.23208	0.61694	3.49313	0.69588	3.49193
0.9787	2.18179	1.12962	3.28909	0.62027	3.55486	0.71323	3.55567
1.00673	2.21844	1.16128	3.35478	0.63758	3.62462	0.73554	3.60022
1.03371	2.25747	1.18492	3.40753	0.64692	3.69502	0.75218	3.65672
1.06036	2.2977	1.21857	3.45863	0.65927	3.77067	0.76853	3.71399
1.08767	2.33887	1.2549	3.52959	0.68124	3.85774	0.7885	3.77957
1.11866	2.37555	1.28822	3.59133	0.69588	3.92501	0.80781	3.84915
1.14697	2.40652	1.32154	3.65849	0.70923	3.9993	0.82349	3.91786
1.17896	2.43695	1.35186	3.72115	0.72953	4.05289	0.84613	3.98912
1.2119	2.46904	1.3848	3.78885	0.74655	4.11844	0.87144	4.06414
1.24289	2.50423	1.42713	3.86142	0.75885	4.17356	0.88746	4.13354
1.27254	2.54621	1.46245	3.92915	0.77849	4.22724	0.91511	4.19975
1.30752	2.58996	1.49839	3.99856	0.79417	4.28549	0.93875	4.27167
1.33851	2.63149	1.54039	4.07606	0.81481	4.35864	0.9674	4.3453
1.38084	2.67423	1.58105	4.14121	0.8325	4.41988	0.98971	4.42187
1.41645	2.72214	1.62067	4.19369	0.85314	4.49719	1.01769	4.4998
1.44977	2.76858	1.66099	4.26268	0.87478	4.58089	1.04334	4.5796
1.48743	2.80174	1.70795	4.33009	0.8918	4.65612	1.06665	4.66061
1.52042	2.8452	1.75295	4.40828	0.91678	4.73615	1.10064	4.73894
1.56103	2.88872	1.80024	4.48929	0.93475	4.82755	1.13363	4.81758
1.60903	2.93797	1.84619	4.57455	0.96206	4.91313	1.16495	4.89288
1.64164	2.98544	1.89553	4.63085	0.97903	4.99909	1.19326	4.97758
1.69198	3.03555	1.94348	4.69718	0.99739	5.07749	1.22491	5.0349
1.73626	3.07221	1.99177	4.77107	1.02604	5.16207	1.26024	5.11
1.77626	3.1289	2.04278	4.84309	1.05001	5.25359	1.29256	5.19101
1.83022	3.16231	2.09941	4.90883	1.07232	5.313	1.33017	5.28404
1.86254	3.20772	2.15771	4.98384	1.09301	5.38939	1.36249	5.37152
1.91617	3.24651	2.21663	5.05124	1.12662	5.4682	1.40315	5.46207
1.9708	3.28584	2.27331	5.11911	1.15031	5.55435	1.44276	5.54727
2.02109	3.32569	2.33556	5.20176	1.17295	5.63083	1.48876	5.63313
2.07538	3.36986	2.39653	5.27176	1.20527	5.71839	1.52804	5.71086
2.12606	3.41463	2.46084	5.35201	1.21157	5.81122	1.57138	5.7853
2.18235	3.45537	2.52982	5.44242	1.25557	5.90533	1.61332	5.85697
2.24828	3.50263	2.59307	5.50483	1.28054	5.99629	1.65532	5.93985
2.31059	3.55374	2.66138	5.58618	1.32321	6.08201	1.70161	6.02232
2.36788	3.58932	2.73465	5.66904	1.35948	6.17152	1.74894	6.10364
2.42518	3.62843	2.80597	5.73945	1.3848	6.24899	1.80257	6.19136
2.48915	3.67687	2.8829	5.82552	1.43313	6.33584	1.84586	6.28177
2.55847	3.7189	2.96156	5.91773	1.45745	6.41943	1.90015	6.37359
2.6274	3.77018	3.02315	6.01552	1.49277	6.50826	1.95283	6.4601
2.69504	3.82694	3.10848	6.08581	1.54006	6.60559	2.00479	6.55823
2.75467	3.88246	3.19342	6.17787	1.57037	6.66738	2.06709	6.65601
2.83328	3.94836	3.2777	6.27165	1.618	6.75503	2.12873	6.75207
2.91089	4.00046	3.36565	6.36687	1.66133	6.85127	2.17702	6.8553
2.98387	4.041	3.4609	6.47073	1.69498	6.95134	2.24199	6.95076
3.07449	4.09302	3.55318	6.547	1.7366	7.05059	2.30691	7.05288
3.14008	4.14395	3.64547	6.63661	1.77859	7.16517	2.37389	7.14414
3.23003	4.18324	3.73976	6.72794	1.82455	7.2673	2.44087	7.24111
3.32532	4.23851	3.84669	6.82533	1.87317	7.37473	2.5035	7.33859
3.40927	4.28584	3.94793	6.92238	1.9165	7.45137	2.57277	7.45187
3.50456	4.33505	4.04556	7.01487	1.97013	7.55712	2.64775	7.5501
3.5855	4.38637	4.16116	7.11238	2.01608	7.66831	2.72369	7.62348
3.68146	4.44559	4.27042	7.20517	2.06342	7.78074	2.80296	7.71758
3.77938	4.49466	4.37767	7.27694	2.11438	7.89514	2.87361	7.81348
3.88234	4.5427	4.47897	7.37165	2.17101	8.00539	2.95322	7.91591
3.98226	4.59459	4.59123	7.47306	2.22097	8.11452	3.03716	8.01783
4.07454	4.64299	4.71184	7.58274	2.26864	8.23166	3.12645	8.08955
4.17351	4.70071	4.83578	7.68396	2.33027	8.35795	3.21173	8.18424
4.29206	4.7495	4.96167	7.78586	2.38123	8.47753	3.30535	8.28157
4.38335	4.79751	5.08795	7.88101	2.43953	8.59724	3.38196	8.38874
4.50796	4.84594	5.21885	7.99165	2.49416	8.72179	3.48125	8.49338
4.61488	4.89374	5.3498	8.08478	2.56047	8.81298	3.57916	8.6
4.73915	4.94701	5.49171	8.16234	2.61576	8.93288	3.67679	8.70783
4.85909	4.99644	5.62294	8.24474	2.67473	9.05607	3.77404	8.81449
4.99132	5.04754	5.76252	8.34671	2.75067	9.17886	3.86566	8.91843
5.11827	5.13861	5.9091	8.43325	2.81264	9.31031	3.96862	9.02934
5.23053	5.21367	6.05635	8.53171	2.88057	9.43531	4.07721	9.13308
5.3661	5.26754	6.20694	8.61641	2.94354	9.56755	4.18614	9.24409
5.49867	5.33783	6.3582	8.69321	3.02086	9.69429	4.30207	9.35439
5.6403	5.40238	6.48209	8.78613	3.09046	9.82714	4.39536	9.46328
5.78354	5.46516	6.64269	8.88229	3.16344	9.95878	4.5143	9.56894
5.9021	5.53367	6.80291	8.9754	3.24004	10.0918	4.63356	9.67697
6.04968	5.59744	6.96646	9.07126	3.32065	10.2191	4.75178	9.78071
6.19827	5.66043	7.13006	9.17314	3.38763	10.3586	4.87839	9.89172
6.34852	5.73744	7.29728	9.26886	3.4619	10.455	5.00534	10.0009
6.50874	5.8058	7.47218	9.37265	3.55519	10.5818	5.11727	10.115
6.64269	5.88043	7.64908	9.483	3.63046	10.709	5.24817	10.2303
6.80257	5.93847	7.82198	9.59032	3.71474	10.8495	5.38278	10.3079
6.9718	6.01174	8.01051	9.69275	3.8117	10.9841	5.52069	10.4101
7.1354	6.08125	8.19109	9.76726	3.89598	11.0875	5.65994	10.5143
7.30463	6.14872	8.37762	9.86496	3.98092	11.2152	5.78354	10.6274
7.44887	6.22096	8.56953	9.96245	4.07188	11.373	5.92345	10.7456
7.61943	6.30046	8.75773	10.0673	4.17251	11.5578	6.07399	10.8549
7.80129	6.38224	8.95828	10.1755	4.27075	11.7454	6.22091	10.9315
7.98253	6.4384	9.1512	10.277	4.35737	11.9206	6.37951	11.0186
8.16377	6.50438	9.32343	10.3494	4.47764	12.0378	6.53343	11.1075
8.32132	6.58082	9.5306	10.4481	4.56592	12.1824	6.66867	11.1953
8.5069	6.64957	9.73615	10.5459	4.6645	12.3359	6.83422	11.2865
8.69181	6.72616	9.93936	10.6556	4.76947	12.4914	6.99082	11.3907
8.89631	6.78552	10.1599	10.7569	4.88373	12.6437	7.15704	11.4963
9.08923	6.85146	10.3711	10.829	4.99232	12.7937	7.32093	11.6085
9.25779	6.92758	10.5913	10.9141	5.09429	12.9369	7.46751	11.7144
9.46267	6.99509	10.8145	11.0085	5.22018	13.1142	7.63807	11.817
9.66221	7.05865	11.0357	11.1071	5.33111	13.2849	7.8093	11.9206
9.8711	7.1316	11.2686	11.209	5.4417	13.4135	7.99054	12.0197
10.086	7.1984	11.4968	11.3214	5.56431	13.5832	8.16611	12.1179
10.2552	7.28064	11.725	11.4382	5.69559	13.7545	8.32666	12.1894
10.4754	7.34516	11.9618	11.5614	5.80685	13.9518	8.51257	12.2827
10.6949	7.4152	12.1987	11.6779	5.93375	14.1308	8.6991	12.3773
10.9118	7.4947	12.4459	11.7992	6.0727	14.3238	8.88768	12.4748
11.143	7.56993	12.6497	11.9224	6.1956	14.4729	9.07955	12.5667
11.3299	7.6516	12.8876	12.0388	6.32521	14.6169	9.27542	12.6834
11.5584	7.73694	13.1431	12.1235	6.44648	14.7978	9.43636	12.7554
11.7959	7.82537	13.3903	12.2332	6.60303	15.0063	9.6452	12.8494
12.0235	7.91178	13.6392	12.3456	6.72964	15.1896	9.84541	12.9527
12.2703	7.97883	13.9017	12.4601	6.86154	15.3249	10.05	13.0541
12.4682	8.05352	14.1602	12.5826	7.02047	15.4984	10.2555	13.1448
12.7034	8.13943	14.4207	12.7002	7.15637	15.6772	10.4344	13.2433
12.9499	8.21947	14.7279	12.8076	7.29895	15.8702	10.6529	13.3481
13.2004	8.30708	14.949	12.9192	7.43686	16.0705	10.8621	13.4476
13.4423	8.39288	15.2109	13.0306	7.60675	16.2779	11.0847	13.5356
13.6611	8.48637	15.4848	13.1508	7.75234	16.467	11.3106	13.6251
13.916	8.55228	15.7552	13.269	7.89792	16.6623	11.5004	13.713
14.1738	8.63826	16.0281	13.3822	8.07382	16.8812	11.731	13.7715
14.432	8.72929	16.3022	13.4926	8.22674	17.0916	11.9532	13.8722
14.6965	8.82128	16.5751	13.5828	8.37728	17.3011	12.1924	14.0122
14.9108	8.88811			8.53922	17.5034	12.4182	14.0586
15.1839	8.9627			8.71945	17.686	12.6614	14.1108
15.4488	9.02406			8.88201	17.8585	12.8613	14.2421
15.7219	9.10584			9.04456	18.0621	13.0998	14.3624
15.9948	9.20466			9.23314	18.2347	13.349	14.4583
16.2213	9.27228			9.40404	18.399	13.5719	14.544
16.4994	9.34541			9.56826	18.5982	13.8317	14.611
16.7786	9.43509			9.74282	18.7918	14.0476	14.6909
17.0591	9.51776			9.94337	18.9936	14.3051	14.7611
17.348	9.62537			10.1189	19.2155	14.5643	14.8504
17.6341	9.70819			10.3028	19.4074	14.8235	14.9339
				10.5144	19.6044	15.0869	15.0133
				10.6959	19.8084	15.3485	15.0687
				10.8881	19.9479
				11.0744	20.1389
				11.2986	20.3316
				11.4931	20.5355
				11.6853	20.7353
				11.9188	20.8823
				12.1144	21.0456
				12.3226	21.245
				12.5278	21.4237
				12.766	21.5862
				12.9769	21.7321
				13.1847	21.9192
				13.4393	22.0655
				13.6575	22.2425
				13.878	22.4247
				14.0986	22.619
				14.3554	22.7535
				14.5806	22.9313
				14.8125	23.1098
				15.076	23.3162
				15.3105	23.4614
				15.5453	23.6442
				15.8235	23.7785

## Sheet: Fig. 4
Number of cycles	∆C/C0	Number of cycles	∆C/C0		Time(s)	∆C/C0		Time(s)	∆C/C0
0	0.00778	0	2.0784		0	0.00279		3.162	0.000115989
0.11111	0.00135	0.14286	0.18133		0.206	0.00242		3.372	-1.73442e-05
0.22222	-0.00291	0.28571	-0.06107		0.377	0.00233		3.583	-0.000124661
0.33333	-0.01318	0.42857	-0.0896		0.588	0.00186		3.744	-8.99729e-05
0.44444	0.78954	0.57143	-0.09735		0.794	0.00163		3.955	-0.000126829
0.55556	0.12272	0.71429	-0.1006		1.024	0.00156		4.117	-0.000243902
0.66667	0.04223	0.85714	-0.11389		1.251	0.00131		4.328	0.05562
0.77778	0.02133	1	2.45178		1.481	0.000960825		4.539	0.00646
0.88889	0.01143	1.14286	-0.03678		1.649	0.000737113		4.699	0.00576
1	0.00206	1.28571	-0.07164		1.811	0.000307216		4.916	0.00549
1.11111	-0.00421	1.42857	-0.09089		2.023	-5.6701e-05		5.084	0.00513
1.22222	0.0284	1.57143	-0.09919		2.26	3.29897e-05		5.296	0.00488
1.33333	0.38429	1.71429	-0.1019		2.469	0.04877		5.507	0.00463
1.44444	0.07314	1.85714	-0.09163		2.66	0.05389
1.55556	0.03066	2	2.69089		2.846	0.06048
1.66667	0.01477	2.14286	-0.04509		3.056	0.06388
1.77778	0.00657	2.28571	-0.08654		3.269	0.0663
1.88889	0.00133	2.42857	-0.09371		3.483	0.06707
2	-0.0069	2.57143	-0.10119		3.714	0.06898
2.11111	0.7265	2.71429	-0.11413		3.946	0.07001
2.22222	0.10928	2.85714	-0.03263		4.178	0.07074
2.33333	0.04699	3	2.514		4.406	0.07755
2.44444	0.02155	3.14286	-0.07347		4.638	0.07971
2.55556	0.01072	3.28571	-0.09014		4.869	0.08099
2.66667	0.0036	3.42857	-0.10265		5.1	0.08213
2.77778	-0.000672857	3.57143	-0.10525		5.33	0.08354
2.88889	-0.00842	3.71429	-0.06347		5.561	0.08418
3	0.28642	3.85714	-0.08733		5.793	0.08592
3.11111	0.18785	4	2.65568		5.953	0.08763
3.22222	0.05796	4.14286	-0.07912		6.164	0.0884
3.33333	0.02517	4.28571	-0.09292		6.382	0.08885
3.44444	0.01163	4.42857	-0.10014		6.614	0.08928
3.55556	0.00336	4.57143	-0.10508		6.846	0.08949
3.66667	-0.00225	4.71429	-0.07659		7.078	0.09001
3.77778	-0.0125	4.85714	-0.03455		7.307	0.09021
3.88889	0.78339	5	2.66568		7.538	0.09035
4	0.11567	5.14286	-0.09289		7.769	0.09069
4.11111	0.0424	5.28571	-0.10157		8	0.09105
4.22222	0.01671	5.42857	-0.10497		8.229	0.06489
4.33333	0.00666	5.57143	-0.0921		8.389	0.05322
4.44444	0.000271429	5.71429	-0.0358		8.601	0.04197
4.55556	-0.00565	5.85714	-0.07642		8.821	0.03731
4.66667	0.01079	6	1.78456		9.052	0.03315
4.77778	0.32949	6.14286	-0.09695		9.283	0.02808
4.88889	0.06846	6.28571	-0.10333		9.514	0.02448
5	0.0344	6.42857	-0.04709		9.747	0.02147
5.11111	0.0169	6.57143	-0.03714		9.98	0.01903
5.22222	0.00828	6.71429	-0.07927		10.207	0.01625
5.33333	0.00214	6.85714	-0.09163		10.438	0.01322
5.44444	-0.00437	7	-0.09831		10.669	0.01074
5.55556	0.09467	7.14286	-0.10226		10.902	0.00926
5.66667	0.31752	7.28571	1.06924		11.132	0.00476
5.77778	0.06719	7.42857	0.79625		11.364	0.00335
5.88889	0.03046	7.57143	-0.06347		11.594	0.00367
6	0.01247	7.71429	-0.08733		11.824	0.00236
6.11111	0.00367	7.85714	-0.09676		12.055	0.00172
6.22222	-0.00278	8	-0.10219		12.285	0.000462887
6.33333	-0.00871	8.14286	-0.11488		12.517	0.00174
6.44444	0.0498	8.28571	2.25641		12.748	0.000649485
6.55556	0.34658	8.42857	-0.04255		12.912	0.000270103
6.66667	0.06921	8.57143	-0.08573		13.12	0.000162887
6.77778	0.03891	8.71429	-0.09577		13.337	-9.17526e-05
6.88889	0.01722	8.85714	-0.09961		13.569	-0.0011
7	0.00705	9	-0.10738		13.799	-0.00127
7.11111	0.00102	9.14286	1.25017		13.958	-0.0021
7.22222	-0.00498	9.28571	0.78975		14.17	-0.00223
7.33333	-0.00531	9.42857	-0.06029		14.389	-0.00105
7.44444	0.34737	9.57143	-0.09024		14.62	-0.00123
7.55556	0.06862	9.71429	-0.09724		14.851	-0.00153
7.66667	0.02908	9.85714	-0.10675		15.083	-0.0016
7.77778	0.01298	10	-0.03044		15.314	-0.0021
7.88889	0.00371	10.1429	1.50751		15.546	-0.00142
8	-0.00142	10.2857	-0.05543		15.775	-0.00337
8.11111	-0.00914	10.4286	-0.08303		16.006	-0.00253
8.22222	0.66639	10.5714	-0.09308		16.237	-0.0019
8.33333	0.08272	10.7143	-0.10132		16.468	-0.00224
8.44444	0.03212	10.8571	-0.10791		16.629	-0.00171
8.55556	0.01167	11	2.01935		16.839	-0.00164
8.66667	0.00293	11.1429	0.32181		17.06	-0.00169
8.77778	-0.00306	11.2857	-0.06047		17.289	-0.00237
8.88889	-0.00978	11.4286	-0.08632		17.451	-0.0039
9	0.34727	11.5714	-0.09197		17.614	-0.00314
9.11111	0.16846	11.7143	-0.09754		17.823	-0.00543
9.22222	0.05255	11.8571	-0.10369		18.036	-0.00411
9.33333	0.02169	12	2.65689		18.248	-0.00436
9.44444	0.0102	12.1429	-0.03131		18.468	-0.00415
9.55556	0.00224	12.2857	-0.07571		18.699	-0.0046
9.66667	-0.00334	12.4286	-0.09076		18.859	-0.00584
9.77778	-0.01493	12.5714	-0.09714		19.018	-0.00635
9.88889	0.7553	12.7143	-0.10217		19.231	-0.00541
10	0.11695	12.8571	0.84966		19.441	-0.00722
10.1111	0.0461	13	0.34357		19.606	-0.00735
10.2222	0.02004	13.1429	-0.07048		19.818	-0.00596
10.3333	0.00787	13.2857	-0.08948		20.039	-0.00641
10.4444	0.00118	13.4286	-0.09383		20.252	0.04203
10.5556	-0.00386	13.5714	-0.09918		20.415	0.05174
10.6667	-0.01584	13.7143	0.88026		20.632	0.05443
10.7778	0.66864	13.8571	0.27517		20.792	0.06058
10.8889	0.08982	14	-0.0596		21.002	0.064
11	0.03575	14.1429	-0.08249		21.217	0.0657
11.1111	0.0164	14.2857	-0.09176		21.377	0.06771
11.2222	0.00563	14.4286	-0.09741		21.592	0.06893
11.3333	-0.000987143	14.5714	-0.10708		21.831	0.07667
11.4444	-0.00778	14.7143	2.53073		22.043	0.07873
11.5556	0.26462	14.8571	-0.03148		22.253	0.08272
11.6667	0.29053	15	-0.08066		22.466	0.08433
11.7778	0.08018	15.1429	-0.09091		22.697	0.08512
11.8889	0.03944	15.2857	-0.09388		22.929	0.08545
12	0.01524	15.4286	-0.09654		23.161	0.08605
12.1111	0.0051	15.5714	1.64651		23.39	0.08657
12.2222	-0.00114	15.7143	1.18198		23.621	0.08696
12.3333	-0.0102	15.8571	-0.03982		23.852	0.08753
12.4444	0.34957	16	-0.08177		24.083	0.08855
12.5556	0.19821	16.1429	-0.0926		24.314	0.08908
12.6667	0.06103	16.2857	-0.09637		24.546	0.08931
12.7778	0.02878	16.4286	-0.09941		24.784	0.08957
12.8889	0.01164	16.5714	2.14244		25.007	0.08981
13	0.00375	16.7143	-0.00699		25.238	0.09008
13.1111	4.71429e-05	16.8571	-0.07469		25.469	0.09015
13.2222	-0.00595	17	-0.09286		25.7	0.09012
13.3333	-0.01716	17.1429	-0.0964		25.931	0.09006
13.4444	0.4352	17.2857	-0.106		26.162	0.08536
13.5556	0.07375	17.4286	1.92978		26.326	0.05148
13.6667	0.02999	17.5714	0.98151		26.535	0.04219
13.7778	0.01373	17.7143	-0.05283		26.752	0.0343
13.8889	0.00722	17.8571	-0.08694		26.983	0.03086
14	0.00115	18	-0.09383		27.214	0.02778
14.1111	-0.00445	18.1429	-0.09865		27.447	0.022
14.2222	-0.01496	18.2857	-0.10543		27.678	0.02013
14.3333	0.79344	18.4286	1.86425		27.907	0.01862
14.4444	0.12524	18.5714	-0.04715		28.067	0.01724
14.5556	0.04502	18.7143	-0.08644		28.227	0.01428
14.6667	0.01674	18.8571	-0.09474		28.439	0.01187
14.7778	0.00667	19	-0.09942		28.651	0.00705
14.8889	-0.000904286	19.1429	-0.10795		28.863	0.00472
15	-0.00503	19.2857	1.81145		29.087	0.00317
15.1111	-0.01602	19.4286	-0.04743		29.318	0.00256
15.2222	0.73147	19.5714	-0.08777		29.548	0.00195
15.3333	0.09821	19.7143	-0.09423		29.78	0.00081134
15.4444	0.0361	19.8571	-0.09873		30.011	-6.70103e-05
15.5556	0.01382	20	-0.04844		30.244	-0.000357732
15.6667	0.00483	20.1429	1.53772		30.473	-0.00101
15.7778	-0.000801429	20.2857	-0.05447		30.704	-0.0016
15.8889	-0.00653	20.4286	-0.08783		30.935	-0.00313
16	0.08385	20.5714	-0.09253		31.166	-0.00423
16.1111	0.35217	20.7143	-0.09706		31.397	-0.0054
16.2222	0.061	20.8571	-0.09926		31.631	-0.00586
16.3333	0.02838	21	2.70254		31.862	-0.00624
16.4444	0.0129	21.1429	-0.03118
16.5556	0.0038	21.2857	-0.07063
16.6667	-0.00142	21.4286	-0.0891
16.7778	-0.00942	21.5714	-0.09416
16.8889	0.66793	21.7143	-0.09769
17	0.08024	21.8571	-0.10077
17.1111	0.03913	22	2.65981
17.2222	0.01633	22.1429	-0.03733
17.3333	0.00644	22.2857	-0.08049
17.4444	-7.85714e-05	22.4286	-0.09394
17.5556	-0.00555	22.5714	-0.09703
17.6667	0.00327	22.7143	-0.10316
17.7778	0.4136	22.8571	2.65257
17.8889	0.07184	23	-0.03599
18	0.03198	23.1429	-0.08269
18.1111	0.01388	23.2857	-0.096
18.2222	0.00521	23.4286	-0.10019
18.3333	-0.0006	23.5714	-0.10353
18.4444	-0.00522	23.7143	2.68562
18.5556	-0.01491	23.8571	-0.03687
18.6667	0.77786	24	-0.07874
18.7778	0.09994	24.1429	-0.09314
18.8889	0.03403	24.2857	-0.09619
19	0.01204	24.4286	-0.10384
19.1111	0.00258	24.5714	2.62073
19.2222	-0.003	24.7143	-0.03904
19.3333	-0.00981	24.8571	-0.08434
19.4444	0.29079	25	-0.09488
19.5556	0.16138	25.1429	-0.09646
19.6667	0.05211	25.2857	-0.10286
19.7778	0.01961	25.4286	2.59457
19.8889	0.00774	25.5714	-0.03898
20	0.00124	25.7143	-0.08384
20.1111	-0.00517	25.8571	-0.09339
20.2222	-0.01324	26	-0.09695
20.3333	0.45551	26.1429	-0.10291
20.4444	0.06997	26.2857	2.43473
20.5556	0.02869	26.4286	-0.03893
20.6667	0.01348	26.5714	-0.08084
20.7778	0.00442	26.7143	-0.09275
20.8889	-0.000498571	26.8571	-0.09946
21	-0.00626	27	-0.10557
21.1111	0.14023	27.1429	2.56759
21.2222	0.25683	27.2857	-0.01588
21.3333	0.06048	27.4286	-0.07371
21.4444	0.02171	27.5714	-0.0906
21.5556	0.01095	27.7143	-0.09597
21.6667	0.0027	27.8571	-0.10208
21.7778	-0.00262	28	1.80348
21.8889	-0.0092	28.1429	1.07326
22	0.31756	28.2857	-0.0512
22.1111	0.17199	28.4286	-0.08791
22.2222	0.05195	28.5714	-0.09483
22.3333	0.01701	28.7143	-0.10123
22.4444	0.00599	28.8571	-0.10529
22.5556	-0.00129	29	0.77882
22.6667	-0.00659	29.1429	0.86845
22.7778	-0.01841	29.2857	-0.06108
22.8889	0.68643	29.4286	-0.08961
23	0.09939	29.5714	-0.09524
23.1111	0.04286	29.7143	-0.10057
23.2222	0.01612	29.8571	0.35583
23.3333	0.00778	30	0.9318
23.4444	0.000865714	30.1429	-0.06044
23.5556	-0.0038	30.2857	-0.08749
23.6667	-0.01211	30.4286	-0.0913
23.7778	0.56079	30.5714	-0.09618
23.8889	0.07094	30.7143	-0.09949
24	0.02843	30.8571	1.92581
24.1111	0.01064	31	0.48936
24.2222	0.00159	31.1429	-0.06818
24.3333	-0.00414	31.2857	-0.08609
24.4444	-0.01325	31.4286	-0.09248
24.5556	0.52399	31.5714	-0.09795
24.6667	0.07096	31.7143	-0.10331
24.7778	0.02416	31.8571	2.25692
24.8889	0.01027	32	-0.04103
25	0.00236	32.1429	-0.08791
25.1111	-0.00122	32.2857	-0.09522
25.2222	-0.01061	32.4286	-0.10085
25.3333	0.01758	32.5714	-0.1036
25.4444	0.30953	32.7143	2.20397
25.5556	0.06375	32.8571	-0.04402
25.6667	0.02575	33	-0.08565
25.7778	0.00854	33.1429	-0.09421
25.8889	-8e-05	33.2857	-0.09967
26	-0.00391	33.4286	-0.10235
26.1111	-0.01568	33.5714	2.35076
26.2222	0.77596	33.7143	-0.04455
26.3333	0.10282	33.8571	-0.08311
26.4444	0.04375	34	-0.09322
26.5556	0.01708	34.1429	-0.09817
26.6667	0.00781	34.2857	-0.1003
26.7778	-0.000615714	34.4286	2.12084
26.8889	-0.00478	34.5714	0.000428571
27	-0.01161	34.7143	-0.07372
27.1111	0.09253	34.8571	-0.08863
27.2222	0.29084	35	-0.09388
27.3333	0.07337	35.1429	-0.09903
27.4444	0.03366	35.2857	0.07643
27.5556	0.01327	35.4286	1.28433
27.6667	0.00389	35.5714	-0.05483
27.7778	-0.00263	35.7143	-0.08145
27.8889	-0.00724	35.8571	-0.09266
28	-0.0157	36	-0.09567
28.1111	0.52443	36.1429	-0.10084
28.2222	0.06721	36.2857	2.73606
28.3333	0.02241	36.4286	-0.03305
28.4444	0.00755	36.5714	-0.07312
28.5556	-0.000457143	36.7143	-0.08767
28.6667	-0.0056	36.8571	-0.09017
28.7778	-0.01483	37	-0.09494
28.8889	0.50089	37.1429	1.36637
29	0.06596	37.2857	0.06843
29.1111	0.02479	37.4286	-0.06852
29.2222	0.00851	37.5714	-0.08707
29.3333	0.000925714	37.7143	-0.09168
29.4444	-0.00458	37.8571	-0.09577
29.5556	-0.01084	38	1.27978
29.6667	0.0542	38.1429	0.08882
29.7778	0.23369	38.2857	-0.04654
29.8889	0.05642	38.4286	-0.08283
30	0.01799	38.5714	-0.09153
30.1111	0.00982	38.7143	-0.09414
30.2222	0.000518571	38.8571	-0.10089
30.3333	-0.00377	39	2.30359
30.4444	-0.01245	39.1429	-0.02599
30.5556	0.23351	39.2857	-0.07329
30.6667	0.17328	39.4286	-0.09046
30.7778	0.04999	39.5714	-0.09457
30.8889	0.01638	39.7143	-0.09734
31	0.00522	39.8571	2.27597
31.1111	-0.00256	40	-0.01482
31.2222	-0.00723	40.1429	-0.07406
31.3333	-0.01872	40.2857	-0.09035
31.4444	0.68776	40.4286	-0.09296
31.5556	0.08112	40.5714	-0.09545
31.6667	0.02898	40.7143	0.28337
31.7778	0.0089	40.8571	0.93994
31.8889	-0.000577143	41	-0.05768
32	-0.00573	41.1429	-0.08733
32.1111	-0.01341	41.2857	-0.09195
32.2222	0.34852	41.4286	-0.09531
32.3333	0.14459	41.5714	0.43447
32.4444	0.04726	41.7143	0.70551
32.5556	0.01422	41.8571	-0.06313
32.6667	0.00255	42	-0.08687
32.7778	-0.00407	42.1429	-0.09182
32.8889	-0.00994	42.2857	-0.09482
33	-0.01985	42.4286	0.62146
33.1111	0.63727	42.5714	0.45918
33.2222	0.07848	42.7143	-0.06589
33.3333	0.02695	42.8571	-0.08246
33.4444	0.00842	43	-0.0909
33.5556	-0.00088	43.1429	-0.09423
33.6667	-0.00562	43.2857	-0.09967
33.7778	-0.01115	43.4286	2.54902
33.8889	-0.02366	43.5714	-0.01995
34	0.55111	43.7143	-0.07214
34.1111	0.07204	43.8571	-0.08899
34.2222	0.03412	44	-0.09306
34.3333	0.01113	44.1429	-0.098
34.4444	0.00239	44.2857	2.106
34.5556	-0.00422	44.4286	-0.00584
34.6667	-0.01005	44.5714	-0.06335
34.7778	-0.01624	44.7143	-0.08641
34.8889	0.45836	44.8571	-0.09141
35	0.06646	45	-0.09435
35.1111	0.01991	45.1429	0.26139
35.2222	0.00581	45.2857	0.97964
35.3333	-0.00255	45.4286	-0.05919
35.4444	-0.00844	45.5714	-0.08748
35.5556	-0.01692	45.7143	-0.09283
35.6667	0.51149	45.8571	-0.09571
35.7778	0.06356	46	0.67327
35.8889	0.0213	46.1429	0.46396
36	0.0057	46.2857	-0.06442
36.1111	-0.0027	46.4286	-0.0881
36.2222	-0.00844	46.5714	-0.09301
36.3333	-0.01881	46.7143	-0.09763
36.4444	0.43879	46.8571	1.45758
36.5556	0.06104	47	0.05005
36.6667	0.01802	47.1429	-0.06899
36.7778	0.00538	47.2857	-0.08823
36.8889	-0.00287	47.4286	-0.09257
37	-0.00705	47.5714	-0.09758
37.1111	-0.01837	47.7143	2.04093
37.2222	0.77531	47.8571	0.00286
37.3333	0.09142	48	-0.07347
37.4444	0.02676	48.1429	-0.09261
37.5556	0.00844	48.2857	-0.0966
37.6667	0.00147	48.4286	-0.10131
37.7778	-0.00417	48.5714	0.86202
37.8889	-0.00949	48.7143	0.68555
38	-0.02341	48.8571	-0.05682
38.1111	0.69706	49	-0.09037
38.2222	0.08005	49.1429	-0.0929
38.3333	0.03185	49.2857	-0.09741
38.4444	0.01416	49.4286	0.49025
38.5556	0.00365	49.5714	0.68817
38.6667	-0.00372	49.7143	-0.06492
38.7778	-0.00727	49.8571	-0.09045
38.8889	-0.01745	50	-0.09551
39	0.67184	50.1429	-0.09775
39.1111	0.07295	50.2857	1.0213
39.2222	0.02501	50.4286	0.07696
39.3333	0.00813	50.5714	-0.06998
39.4444	-0.000938571	50.7143	-0.08831
39.5556	-0.00626	50.8571	-0.08973
39.6667	-0.01547	51	-0.09229
39.7778	0.6452	51.1429	1.7797
39.8889	0.0752	51.2857	0.01134
40	0.02379	51.4286	-0.07153
40.1111	0.00851	51.5714	-0.08721
40.2222	0.000101429	51.7143	-0.09125
40.3333	-0.00553	51.8571	-0.09697
40.4444	-0.01216	52	2.50102
40.5556	0.20148	52.1429	-0.02434
40.6667	0.44259	52.2857	-0.07127
40.7778	0.06447	52.4286	-0.08817
40.8889	0.0206	52.5714	-0.09147
41	0.00577	52.7143	-0.0991
41.1111	-0.00206	52.8571	2.75127
41.2222	-0.00684	53	-0.03578
41.3333	-0.01702	53.1429	-0.07444
41.4444	0.54327	53.2857	-0.08972
41.5556	0.06424	53.4286	-0.09335
41.6667	0.01933	53.5714	-0.10014
41.7778	0.00576	53.7143	2.57711
41.8889	-0.00446	53.8571	-0.03682
42	-0.00805	54	-0.0784
42.1111	-0.01358	54.1429	-0.08897
42.2222	-0.02403	54.2857	-0.09259
42.3333	0.55671	54.4286	-0.09765
42.4444	0.08957	54.5714	2.45781
42.5556	0.02869	54.7143	0.000952381
42.6667	0.00884	54.8571	-0.06907
42.7778	0.000768571	55	-0.08619
42.8889	-0.00621	55.1429	-0.09126
43	-0.01372	55.2857	-0.09761
43.1111	0.08656	55.4286	0.99571
43.2222	0.23037	55.5714	0.14295
43.3333	0.05461	55.7143	-0.0676
43.4444	0.01684	55.8571	-0.08643
43.5556	0.00363	56	-0.08959
43.6667	-0.00575	56.1429	-0.09563
43.7778	-0.01037	56.2857	-0.01158
43.8889	-0.02095	56.4286	1.35293
44	0.77959	56.5714	-0.05081
44.1111	0.09234	56.7143	-0.07555
44.2222	0.02917	56.8571	-0.0875
44.3333	0.00604	57	-0.09433
44.4444	-0.00299	57.1429	-0.09936
44.5556	-0.00883	57.2857	2.53441
44.6667	-0.01696	57.4286	-0.04109
44.7778	0.19102	57.5714	-0.08084
44.8889	0.29372	57.7143	-0.09297
45	0.06894	57.8571	-0.09864
45.1111	0.02744	58	0.02659
45.2222	0.00739	58.1429	1.18452
45.3333	-0.00161	58.2857	-0.05467
45.4444	-0.00751	58.4286	-0.0827
45.5556	-0.01764	58.5714	-0.09317
45.6667	0.69154	58.7143	-0.09825
45.7778	0.07266	58.8571	1.39141
45.8889	0.02142	59	0.05349
46	0.00493	59.1429	-0.06742
46.1111	-0.00375	59.2857	-0.08668
46.2222	-0.00868	59.4286	-0.09446
46.3333	-0.01635	59.5714	-0.0993
46.4444	0.30484	59.7143	2.5041
46.5556	0.19926	59.8571	-0.02788
46.6667	0.0592	60	-0.0713
46.7778	0.01868	60.1429	-0.08806
46.8889	0.00511	60.2857	-0.09567
47	-0.00431	60.4286	-0.10099
47.1111	-0.00849	60.5714	2.57359
47.2222	-0.01891	60.7143	-0.04004
47.3333	0.63904	60.8571	-0.07581
47.4444	0.07073	61	-0.09066
47.5556	0.02207	61.1429	-0.09753
47.6667	0.0088	61.2857	0.01058
47.7778	-0.000515714	61.4286	1.16401
47.8889	-0.00622	61.5714	-0.05574
48	-0.01291	61.7143	-0.0781
48.1111	-0.02402	61.8571	-0.09073
48.2222	0.50263	62	-0.09725
48.3333	0.06802	62.1429	-0.10079
48.4444	0.02057	62.2857	1.75406
48.5556	0.00305	62.4286	-0.00243
48.6667	-0.00484	62.5714	-0.06916
48.7778	-0.00918	62.7143	-0.08873
48.8889	-0.01979	62.8571	-0.0933
49	0.717	63	-0.09574
49.1111	0.07509	63.1429	0.23627
49.2222	0.0258	63.2857	2.21797
49.3333	0.00694	63.4286	-0.03936
49.4444	-0.00142	63.5714	-0.07354
49.5556	-0.00854	63.7143	-0.09025
49.6667	-0.01717	63.8571	-0.09694
49.7778	0.29856	64	-0.01782
49.8889	0.16205	64.1429	1.3153
50	0.04569	64.2857	-0.04923
50.1111	0.01236	64.4286	-0.07798
50.2222	0.000575714	64.5714	-0.09058
50.3333	-0.00461	64.7143	-0.09481
50.4444	-0.00937	64.8571	1.08945
50.5556	-0.01805	65	0.08952
50.6667	0.29589	65.1429	-0.06712
50.7778	0.28198	65.2857	-0.08443
50.8889	0.06862	65.4286	-0.09183
51	0.02486	65.5714	-0.09685
51.1111	0.01007	65.7143	2.44114
51.2222	-0.000447143	65.8571	-0.01814
51.3333	-0.00663	66	-0.06381
51.4444	-0.01288	66.1429	-0.08254
51.5556	-0.02373	66.2857	-0.0936
51.6667	0.62657	66.4286	-0.09625
51.7778	0.07459	66.5714	-0.10509
51.8889	0.02355	66.7143	2.43102
52	0.00788	66.8571	-0.04427
52.1111	-0.00177	67	-0.07834
52.2222	-0.00848	67.1429	-0.09546
52.3333	-0.01567	67.2857	-0.10154
52.4444	0.16677	67.4286	-0.10239
52.5556	0.20183	67.5714	2.76911
52.6667	0.04918	67.7143	-0.02877
52.7778	0.01755	67.8571	-0.06707
52.8889	0.00336	68	-0.08301
53	-0.00305	68.1429	-0.0905
53.1111	-0.00861	68.2857	-0.10215
53.2222	-0.01637	68.4286	2.77086
53.3333	0.11898	68.5714	-0.03295
53.4444	0.39491	68.7143	-0.06854
53.5556	0.07893	68.8571	-0.0847
53.6667	0.02622	69	-0.09934
53.7778	0.00842	69.1429	-0.10289
53.8889	-0.00148	69.2857	2.44473
54	-0.0086	69.4286	-0.03323
54.1111	-0.01605	69.5714	-0.0702
54.2222	0.1709	69.7143	-0.08432
54.3333	0.19885	69.8571	-0.09815
54.4444	0.04953	70	-0.09977
54.5556	0.01515	70.1429	2.43289
54.6667	0.00337	70.2857	-0.01881
54.7778	-0.00486	70.4286	-0.06614
54.8889	-0.0089	70.5714	-0.0846
55	-0.01671	70.7143	-0.09581
55.1111	0.18405	70.8571	-0.10362
55.2222	0.2035	71	2.73194
55.3333	0.05143	71.1429	-0.03008
55.4444	0.01613	71.2857	-0.06608
55.5556	0.00187	71.4286	-0.08293
55.6667	-0.00606	71.5714	-0.09347
55.7778	-0.01115	71.7143	-0.1024
55.8889	-0.02216	71.8571	2.76921
56	0.8207	72	-0.02914
56.1111	0.10193	72.1429	-0.06715
56.2222	0.03438	72.2857	-0.08097
56.3333	0.00895	72.4286	-0.09456
56.4444	-0.000882857	72.5714	-0.09938
56.5556	-0.00757	72.7143	2.12393
56.6667	-0.01394	72.8571	0.32292
56.7778	-0.01648	73	-0.04583
56.8889	0.40902	73.1429	-0.06989
57	0.06648	73.2857	-0.08352
57.1111	0.02269	73.4286	-0.09665
57.2222	0.00578	73.5714	0.1423
57.3333	-0.000282857	73.7143	1.12113
57.4444	-0.00736	73.8571	-0.0437
57.5556	-0.01352	74	-0.07238
57.6667	0.01023	74.1429	-0.08415
57.7778	0.43907	74.2857	-0.09069
57.8889	0.06527	74.4286	-0.1016
58	0.02039	74.5714	2.76311
58.1111	0.00398	74.7143	-0.02701
58.2222	-0.00339	74.8571	-0.06605
58.3333	-0.00909	75	-0.07992
58.4444	-0.01814	75.1429	-0.09465
58.5556	0.72779	75.2857	-0.09816
58.6667	0.07574	75.4286	2.57594
58.7778	0.02368	75.5714	-0.03179
58.8889	0.0073	75.7143	-0.06972
59	-0.00107	75.8571	-0.08226
59.1111	-0.00832	76	-0.0958
59.2222	-0.01643	76.1429	-0.09934
59.3333	0.19297	76.2857	1.96284
59.4444	0.20093	76.4286	0.00819
59.5556	0.05502	76.5714	-0.06568
59.6667	0.02089	76.7143	-0.08345
59.7778	0.00601	76.8571	-0.09575
59.8889	-0.0014	77	-0.09801
60	-0.00752	77.1429	2.26273
60.1111	-0.01131	77.2857	-0.00651
60.2222	-0.02069	77.4286	-0.06444
60.3333	0.48617	77.5714	-0.08199
60.4444	0.07345	77.7143	-0.09314
60.5556	0.02688	77.8571	-0.09593
60.6667	0.00804	78	2.18508
60.7778	-0.00085	78.1429	0.02419
60.8889	-0.00759	78.2857	-0.05625
61	-0.01486	78.4286	-0.07767
61.1111	0.06282	78.5714	-0.08819
61.2222	0.25994	78.7143	-0.09366
61.3333	0.05483	78.8571	0.45008
61.4444	0.01802	79	0.72335
61.5556	0.00341	79.1429	-0.05007
61.6667	-0.00444	79.2857	-0.07962
61.7778	-0.00989	79.4286	-0.0835
61.8889	-0.01968	79.5714	-0.09361
62	0.70021	79.7143	0.68156
62.1111	0.09345	79.8571	0.54231
62.2222	0.03998	80	-0.05442
62.3333	0.01602	80.1429	-0.07699
62.4444	0.00397	80.2857	-0.08271
62.5556	-0.00358	80.4286	-0.0921
62.6667	-0.00997	80.5714	-0.09588
62.7778	-0.02088	80.7143	2.5207
62.8889	0.81814	80.8571	-0.02606
63	0.09745	81	-0.06637
63.1111	0.03498	81.1429	-0.08586
63.2222	0.01366	81.2857	-0.08749
63.3333	0.00178	81.4286	-0.09965
63.4444	-0.00753	81.5714	2.71368
63.5556	-0.01494	81.7143	-0.02225
63.6667	0.11607	81.8571	-0.069
63.7778	0.43164	82	-0.08037
63.8889	0.08094	82.1429	-0.0824
64	0.03086	82.2857	-0.09132
64.1111	0.0155	82.4286	1.41008
64.2222	0.0025	82.5714	0.1141
64.3333	-0.0058	82.7143	-0.05678
64.4444	-0.0122	82.8571	-0.07849
64.5556	-0.02224	83	-0.08314
64.6667	0.36719	83.1429	-0.09116
64.7778	0.06089	83.2857	0.88545
64.8889	0.02434	83.4286	2.08946
65	0.0086	83.5714	-0.02198
65.1111	-0.00177	83.7143	-0.06935
65.2222	-0.00817	83.8571	-0.08214
65.3333	-0.01701	84	-0.08482
65.4444	0.27488	84.1429	-0.0943
65.5556	0.17738	84.2857	1.14173
65.6667	0.04752	84.4286	0.16627
65.7778	0.01617	84.5714	-0.05969
65.8889	0.00354	84.7143	-0.08194
66	-0.00422	84.8571	-0.0858
66.1111	-0.01163	85	-0.08957
66.2222	-0.02444	85.1429	0.86524
66.3333	0.75541	85.2857	0.40293
66.4444	0.08484	85.4286	-0.05525
66.5556	0.02894	85.5714	-0.08034
66.6667	0.00975	85.7143	-0.0854
66.7778	0.00177	85.8571	-0.08845
66.8889	-0.00333	86	-0.09893
67	-0.0105	86.1429	2.67603
67.1111	-0.01986	86.2857	0.02965
67.2222	0.77117	86.4286	-0.06605
67.3333	0.08539	86.5714	-0.08411
67.4444	0.03381	86.7143	-0.08846
67.5556	0.01268	86.8571	-0.09433
67.6667	0.00176	87	0.5887
67.7778	-0.00626	87.1429	0.72402
67.8889	-0.01268	87.2857	-0.05217
68	-0.02533	87.4286	-0.07979
68.1111	0.73779	87.5714	-0.08472
68.2222	0.08536	87.7143	-0.08691
68.3333	0.04252	87.8571	0.20802
68.4444	0.01496	88	1.25481
68.5556	0.00274	88.1429	-0.04053
68.6667	-0.00427	88.2857	-0.07587
68.7778	-0.01069	88.4286	-0.08362
68.8889	-0.02367	88.5714	-0.08438
69	0.79743	88.7143	-0.09138
69.1111	0.09725	88.8571	0.66436
69.2222	0.03392	89	1.24817
69.3333	0.01009	89.1429	-0.03546
69.4444	0.00102	89.2857	-0.07615
69.5556	-0.00728	89.4286	-0.0865
69.6667	-0.01409	89.5714	-0.09108
69.7778	0.0287	89.7143	-0.09882
69.8889	0.39305	89.8571	2.46876
70	0.06448	90	-0.02401
70.1111	0.02371	90.1429	-0.06947
70.2222	0.00918	90.2857	-0.08308
70.3333	-0.0011	90.4286	-0.08729
70.4444	-0.00803	90.5714	-0.0965
70.5556	-0.01204	90.7143	0.66469
70.6667	-0.02166	90.8571	1.67577
70.7778	0.56263	91	-0.02077
70.8889	0.06978	91.1429	-0.0656
71	0.02127	91.2857	-0.08171
71.1111	0.00559	91.4286	-0.08575
71.2222	-0.00268	91.5714	-0.09212
71.3333	-0.00889	91.7143	2.14919
71.4444	-0.01345	91.8571	0.02184
71.5556	-0.02606	92	-0.06447
71.6667	0.55713	92.1429	-0.08143
71.7778	0.07202	92.2857	-0.08225
71.8889	0.03627	92.4286	-0.0843
72	0.01317	92.5714	0.76314
72.1111	0.00183	92.7143	0.53037
72.2222	-0.00379	92.8571	-0.04486
72.3333	-0.01015	93	-0.07363
72.4444	-0.01966	93.1429	-0.07883
72.5556	0.72551	93.2857	-0.08158
72.6667	0.09191	93.4286	0.0954
72.7778	0.0379	93.5714	2.0492
72.8889	0.01455	93.7143	-0.02378
73	0.00358	93.8571	-0.06716
73.1111	-0.00472	94	-0.08238
73.2222	-0.01269	94.1429	-0.08582
73.3333	-0.02517	94.2857	-0.08823
73.4444	0.56893	94.4286	1.64736
73.5556	0.07474	94.5714	0.05906
73.6667	0.03608	94.7143	-0.05265
73.7778	0.0151	94.8571	-0.07657
73.8889	0.00123	95	-0.08092
74	-0.00404	95.1429	-0.08333
74.1111	-0.01047	95.2857	0.32317
74.2222	-0.02149	95.4286	1.12616
74.3333	0.50066	95.5714	-0.03953
74.4444	0.07562	95.7143	-0.07149
74.5556	0.0328	95.8571	-0.08045
74.6667	0.01138	96	-0.08339
74.7778	3.71429e-05	96.1429	-0.09512
74.8889	-0.00674	96.2857	2.43943
75	-0.01341	96.4286	-0.02345
75.1111	0.27473	96.5714	-0.06329
75.2222	0.20804	96.7143	-0.07833
75.3333	0.05079	96.8571	-0.08213
75.4444	0.01656	97	-0.09339
75.5556	0.00407	97.1429	2.7874
75.6667	-0.00398	97.2857	-0.0159
75.7778	-0.0121	97.4286	-0.05852
75.8889	-0.02529	97.5714	-0.07501
76	0.63321	97.7143	-0.08254
76.1111	0.07319	97.8571	-0.08518
76.2222	0.02214	98	0.08535
76.3333	0.00854	98.1429	1.60376
76.4444	-0.00154	98.2857	-0.029
76.5556	-0.00748	98.4286	-0.06657
76.6667	-0.01427	98.5714	-0.08079
76.7778	0.02617	98.7143	-0.08347
76.8889	0.36078	98.8571	-0.09046
77	0.05978	99	2.14144
77.1111	0.02456	99.1429	0.01513
77.2222	0.00935	99.2857	-0.05971
77.3333	-0.00105	99.4286	-0.07142
77.4444	-0.00779	99.5714	-0.07896
77.5556	-0.01465	99.7143	-0.08207
77.6667	0.38729	99.8571	-0.09353
77.7778	0.18009	100	2.25771
77.8889	0.04668	100.143	-0.02345
78	0.01541	100.286	-0.06646
78.1111	0.0021	100.429	-0.08137
78.2222	-0.00523	100.571	-0.08088
78.3333	-0.0127	100.714	-0.09567
78.4444	-0.02324	100.857	2.52676
78.5556	0.5199	101	-0.02425
78.6667	0.06655	101.143	-0.06336
78.7778	0.02293	101.286	-0.08099
78.8889	0.00974	101.429	-0.08435
79	-0.00163	101.571	-0.08586
79.1111	-0.00839	101.714	1.5017
79.2222	-0.01541	101.857	0.05632
79.3333	0.23939	102	-0.0572
79.4444	0.24397	102.143	-0.07909
79.5556	0.05376	102.286	-0.08255
79.6667	0.02126	102.429	-0.08464
79.7778	0.01158	102.571	-0.0929
79.8889	-0.00112	102.714	2.33914
80	-0.00943	102.857	-0.02323
80.1111	-0.01843	103	-0.06026
80.2222	0.70256	103.143	-0.08035
80.3333	0.0775	103.286	-0.08371
80.4444	0.02914	103.429	-0.08689
80.5556	0.00735	103.571	1.9307
80.6667	-0.000448571	103.714	0.02708
80.7778	-0.00571	103.857	-0.05741
80.8889	-0.01385	104	-0.08071
81	-0.000535714	104.143	-0.08499
81.1111	0.43189	104.286	-0.08802
81.2222	0.06387	104.429	1.56474
81.3333	0.02275	104.571	1.32401
81.4444	0.0052	104.714	-0.03115
81.5556	-0.0034	104.857	-0.07029
81.6667	-0.00965	105	-0.08485
81.7778	-0.01598	105.143	-0.08831
81.8889	0.25157	105.286	-0.098
82	0.25475	105.429	2.13706
82.1111	0.05506	105.571	-0.02546
82.2222	0.02081	105.714	-0.0634
82.3333	0.00631	105.857	-0.08274
82.4444	-0.00257	106	-0.08649
82.5556	-0.00855	106.143	-0.08858
82.6667	-0.01786	106.286	2.05704
82.7778	0.31872	106.429	0.86313
82.8889	0.21142	106.571	-0.03811
83	0.04679	106.714	-0.07035
83.1111	0.01936	106.857	-0.08386
83.2222	0.00523	107	-0.08733
83.3333	-0.00285	107.143	-0.09017
83.4444	-0.00921	107.286	1.98147
83.5556	-0.01593	107.429	-0.02474
83.6667	0.38808	107.571	-0.07022
83.7778	0.17869	107.714	-0.08494
83.8889	0.04815	107.857	-0.08752
84	0.01485	108	-0.09223
84.1111	0.00216	108.143	2.14921
84.2222	-0.00487	108.286	-0.01575
84.3333	-0.01145	108.429	-0.06258
84.4444	-0.0244	108.571	-0.08355
84.5556	0.82184	108.714	-0.08658
84.6667	0.10639	108.857	-0.08892
84.7778	0.04674	109	2.16373
84.8889	0.01857	109.143	0.74649
85	0.00633	109.286	-0.03445
85.1111	-0.00246	109.429	-0.0714
85.2222	-0.00774	109.571	-0.08474
85.3333	-0.01666	109.714	-0.08777
85.4444	0.59207	109.857	-0.09073
85.5556	0.13739	110	2.60724
85.6667	0.04157	110.143	-0.0173
85.7778	0.01314	110.286	-0.06159
85.8889	0.000517143	110.429	-0.08165
86	-0.00582	110.571	-0.08508
86.1111	-0.0156	110.714	-0.08868
86.2222	0.01753	110.857	2.1451
86.3333	0.46911	111	0.01944
86.4444	0.0802	111.143	-0.05937
86.5556	0.03057	111.286	-0.0796
86.6667	0.00923	111.429	-0.08298
86.7778	0.000431429	111.571	-0.08695
86.8889	-0.00564	111.714	1.82758
87	-0.01456	111.857	0.03829
87.1111	0.03174	112	-0.05804
87.2222	0.33814	112.143	-0.08036
87.3333	0.05825	112.286	-0.08409
87.4444	0.02075	112.429	-0.08725
87.5556	0.00556	112.571	1.5166
87.6667	-0.00282	112.714	0.07364
87.7778	-0.01083	112.857	-0.03282
87.8889	-0.02315	113	-0.06936
88	0.68203	113.143	-0.08239
88.1111	0.07642	113.286	-0.08431
88.2222	0.02844	113.429	-0.08643
88.3333	0.00866	113.571	1.54766
88.4444	2.57143e-05	113.714	0.13135
88.5556	-0.00596	113.857	-0.02841
88.6667	-0.01434	114	-0.06924
88.7778	0.20796	114.143	-0.08392
88.8889	0.22502	114.286	-0.08779
89	0.05128	114.429	-0.09035
89.1111	0.0179	114.571	2.75114
89.2222	0.00255	114.714	-0.02107
89.3333	-0.00507	114.857	-0.06697
89.4444	-0.0116	115	-0.08414
89.5556	-0.02097	115.143	-0.08706
89.6667	0.56983	115.286	-0.08874
89.7778	0.0644	115.429	1.44147
89.8889	0.01885	115.571	0.38313
90	0.0051	115.714	-0.02479
90.1111	-0.004	115.857	-0.0687
90.2222	-0.01042	116	-0.08406
90.3333	-0.01749	116.143	-0.08719
90.4444	0.74933	116.286	-0.09085
90.5556	0.08202	116.429	2.73337
90.6667	0.0298	116.571	-0.02146
90.7778	0.00799	116.714	-0.06021
90.8889	-0.00206	116.857	-0.07826
91	-0.01003	117	-0.08531
91.1111	-0.02007	117.143	-0.0877
91.2222	0.52076	117.286	-0.09098
91.3333	0.06132	117.429	2.54295
91.4444	0.01935	117.571	0.00207
91.5556	0.00415	117.714	-0.06009
91.6667	-0.00528	117.857	-0.08031
91.7778	-0.01321	118	-0.08489
91.8889	-0.02337	118.143	-0.08776
92	0.72914	118.286	1.60463
92.1111	0.0782	118.429	0.05682
92.2222	0.02951	118.571	-0.05906
92.3333	0.00654	118.714	-0.07937
92.4444	-0.00195	118.857	-0.08483
92.5556	-0.00784	119	-0.08795
92.6667	-0.01534	119.143	1.5786
92.7778	0.0664	119.286	0.05223
92.8889	0.32354	119.429	-0.05996
93	0.0569	119.571	-0.08155
93.1111	0.01841	119.714	-0.08544
93.2222	0.00354	119.857	-0.08811
93.3333	-0.00378	120	1.87527
93.4444	-0.01227	120.143	0.02536
93.5556	-0.02269	120.286	-0.07328
93.6667	0.75776	120.429	-0.0856
93.7778	0.0837	120.571	-0.09776
93.8889	0.02678	120.714	-0.10033
94	0.00613	120.857	-0.10333
94.1111	-0.00394	121	1.98819
94.2222	-0.01103	121.143	-0.04042
94.3333	-0.01897	121.286	-0.0838
94.4444	0.60241	121.429	-0.09771
94.5556	0.14279	121.571	-0.10091
94.6667	0.04055	121.714	-0.1016
94.7778	0.01429	121.857	1.89259
94.8889	0.00143	122	-0.03924
95	-0.00663	122.143	-0.0833
95.1111	-0.01528	122.286	-0.09505
95.2222	-0.02581	122.429	-0.09942
95.3333	0.78281	122.571	-0.10197
95.4444	0.09474	122.714	2.51283
95.5556	0.0337	122.857	-0.01396
95.6667	0.00864	123	-0.06541
95.7778	-0.000995714	123.143	-0.09007
95.8889	-0.00838	123.286	-0.09839
96	-0.01691	123.429	-0.10155
96.1111	0.73847	123.571	0.30498
96.2222	0.08546	123.714	1.11169
96.3333	0.03186	123.857	-0.03703
96.4444	0.00914	124	-0.07991
96.5556	0.000905714	124.143	-0.09607
96.6667	-0.00644	124.286	-0.09909
96.7778	-0.01234	124.429	-0.10143
96.8889	0.21044	124.571	0.96688
97	0.44094	124.714	0.33434
97.1111	0.07035	124.857	-0.04006
97.2222	0.03702	125	-0.08296
97.3333	0.01557	125.143	-0.09587
97.4444	0.00528	125.286	-0.09871
97.5556	-0.000757143	125.429	-0.10159
97.6667	-0.00963	125.571	1.73009
97.7778	0.03446	125.714	0.02512
97.8889	0.40669	125.857	-0.0725
98	0.06452	126	-0.09438
98.1111	0.02437	126.143	-0.09854
98.2222	0.00929	126.286	-0.09752
98.3333	0.000734286	126.429	0.1238
98.4444	-0.00754	126.571	1.52428
98.5556	-0.01501	126.714	-0.04157
98.6667	0.67717	126.857	-0.08132
98.7778	0.15731	127	-0.09332
98.8889	0.04541	127.143	-0.0959
99	0.01509	127.286	0.12521
99.1111	0.00151	127.429	1.20618
99.2222	-0.00489	127.571	-0.04572
99.3333	-0.01134	127.714	-0.08279
99.4444	-0.02054	127.857	-0.09203
99.5556	0.77517	128	-0.09491
99.6667	0.14097	128.143	-0.09736
99.7778	0.04675	128.286	2.80381
99.8889	0.01734	128.429	-0.0322
100	0.00416	128.571	-0.0756
100.111	-0.00295	128.714	-0.09218
100.222	-0.00994	128.857	-0.09458
100.333	-0.0189	129	-0.09741
100.444	0.82431	129.143	1.27665
100.556	0.10103	129.286	0.08488
100.667	0.03513	129.429	-0.06628
100.778	0.01316	129.571	-0.08816
100.889	0.00316	129.714	-0.09414
101	-0.00161	129.857	-0.09643
101.111	-0.00765	130	-0.07947
101.222	-0.01616	130.143	2.15678
101.333	0.8017	130.286	-0.03676
101.444	0.12472	130.429	-0.07834
101.556	0.04068	130.571	-0.09193
101.667	0.01379	130.714	-0.09575
101.778	0.00308	130.857	-0.09155
101.889	-0.00307	131	1.78676
102	-0.00906	131.143	-0.04195
102.111	-0.01572	131.286	-0.08283
102.222	0.65219	131.429	-0.09299
102.333	0.23087	131.571	-0.09542
102.444	0.06589	131.714	-0.09808
102.556	0.02746	131.857	2.56781
102.667	0.01102	132	-0.0231
102.778	0.0015	132.143	-0.07295
102.889	-0.0061	132.286	-0.09033
103	-0.01223	132.429	-0.09418
103.111	0.7039	132.571	-0.0967
103.222	0.10638	132.714	2.73378
103.333	0.03924	132.857	-0.0186
103.444	0.01358	133	-0.06535
103.556	0.00136	133.143	-0.08289
103.667	-0.00288	133.286	-0.08627
103.778	-0.00907	133.429	-0.08902
103.889	-0.0158	133.571	2.79651
104	0.78836	133.714	-0.02818
104.111	0.13178	133.857	-0.07322
104.222	0.04158	134	-0.08966
104.333	0.01577	134.143	-0.09309
104.444	0.00447	134.286	-0.09523
104.556	-0.000978571	134.429	1.62051
104.667	-0.00726	134.571	0.08842
104.778	-0.01403	134.714	-0.06153
104.889	0.61031	134.857	-0.0893
105	0.18932	135	-0.09407
105.111	0.05088	135.143	-0.09573
105.222	0.02355	135.286	-0.0983
105.333	0.00757	135.429	2.34892
105.444	-0.000358571	135.571	-0.03296
105.556	-0.00653	135.714	-0.07941
105.667	-0.01162	135.857	-0.09186
105.778	0.24567	136	-0.09464
105.889	0.27028	136.143	-0.09792
106	0.06608	136.286	2.20105
106.111	0.02864	136.429	-0.02962
106.222	0.01388	136.571	-0.07596
106.333	0.00286	136.714	-0.08969
106.444	-0.0041	136.857	-0.09259
106.556	-0.01251	137	-0.09618
106.667	0.66134	137.143	2.70556
106.778	0.09762	137.286	-0.004
106.889	0.03939	137.429	-0.06639
107	0.018	137.571	-0.08883
107.111	0.00441	137.714	-0.09211
107.222	-0.00294	137.857	-0.09475
107.333	-0.00889	138	2.05715
107.444	-0.00643	138.143	0.02233
107.556	0.55533	138.286	-0.06498
107.667	0.1149	138.429	-0.08912
107.778	0.04624	138.571	-0.0927
107.889	0.0232	138.714	-0.09562
108	0.00647	138.857	0.19513
108.111	-0.000424286	139	1.65771
108.222	-0.00555	139.143	-0.03135
108.333	-0.01098	139.286	-0.07731
108.444	0.75617	139.429	-0.09004
108.556	0.10904	139.571	-0.0932
108.667	0.03953	139.714	-0.09521
108.778	0.01564	139.857	2.17025
108.889	0.00502	140	0.03933
109	0.000142857	140.143	-0.04472
109.111	-0.00448	140.286	-0.08597
109.222	-0.01299	140.429	-0.09017
109.333	0.74767	140.571	-0.09298
109.444	0.19858	140.714	-0.07919
109.556	0.06163	140.857	1.86895
109.667	0.02454	141	-0.03326
109.778	0.01023	141.143	-0.07923
109.889	0.00205	141.286	-0.09094
110	-0.00545	141.429	-0.09438
110.111	-0.01334	141.571	-0.09733
110.222	0.71791	141.714	2.2741
110.333	0.10195	141.857	-0.0334
110.444	0.03686	142	-0.0764
110.556	0.01453	142.143	-0.09046
110.667	0.00159	142.286	-0.09296
110.778	-0.00397	142.429	-0.09574
110.889	-0.0091	142.571	2.50663
111	-0.01461	142.714	-0.03006
111.111	0.55744	142.857	-0.07431
111.222	0.08203	143	-0.09056
111.333	0.03286	143.143	-0.0945
111.444	0.01311	143.286	-0.09695
111.556	0.0033	143.429	2.02505
111.667	-0.00233	143.571	0.04445
111.778	-0.00918	143.714	-0.05763
111.889	-0.01875	143.857	-0.08834
112	0.77281	144	-0.09244
112.111	0.14725	144.143	-0.09508
112.222	0.04964	144.286	0.85834
112.333	0.01887	144.429	0.44816
112.444	0.00419	144.571	-0.04377
112.556	-0.00108	144.714	-0.08448
112.667	-0.00717	144.857	-0.09104
112.778	-0.0149	145	-0.09389
112.889	0.82864	145.143	-0.09611
113	0.11717	145.286	2.708
113.111	0.05499	145.429	-0.02452
113.222	0.02329	145.571	-0.07174
113.333	0.01	145.714	-0.08893
113.444	0.00231	145.857	-0.09256
113.556	-0.00586	146	-0.09503
113.667	-0.01332	146.143	2.7713
113.778	0.77741	146.286	-0.02031
113.889	0.14395	146.429	-0.07436
114	0.04863	146.571	-0.09227
114.111	0.02197	146.714	-0.0935
114.222	0.01232	146.857	-0.09331
114.333	0.00532	147	0.19758
114.444	-0.00235	147.143	1.40112
114.556	-0.01294	147.286	-0.03773
114.667	0.68839	147.429	-0.0819
114.778	0.10224	147.571	-0.0939
114.889	0.03568	147.714	-0.09652
115	0.01267	147.857	-0.09822
115.111	-3.57143e-05	148	2.07036
115.222	-0.00603	148.143	-0.03459
115.333	-0.0117	148.286	-0.07914
115.444	0.10518	148.429	-0.09249
115.556	0.35889	148.571	-0.09495
115.667	0.07606	148.714	-0.09831
115.778	0.02577	148.857	2.44092
115.889	0.00985	149	-0.03702
116	0.000657143	149.143	-0.07633
116.111	-0.00547	149.286	-0.09148
116.222	-0.0102	149.429	-0.0911
116.333	-0.01962	149.571	-0.09389
116.444	0.72754	149.714	2.66149
116.556	0.092	149.857	-0.03433
116.667	0.03397	150	-0.07627
116.778	0.01417	150.143	-0.09226
116.889	0.00319	150.286	-0.09566
117	-0.00145	150.429	-0.09866
117.111	-0.00614	150.571	2.7519
117.222	-0.01531	150.714	-0.03288
117.333	0.82437	150.857	-0.07199
117.444	0.11958	151	-0.08808
117.556	0.04173	151.143	-0.09106
117.667	0.01687	151.286	-0.09372
117.778	0.00353	151.429	1.82382
117.889	-0.00345	151.571	0.07761
118	-0.00952	151.714	-0.0538
118.111	-0.01956	151.857	-0.0904
118.222	0.70276	152	-0.09405
118.333	0.09445	152.143	-0.09686
118.444	0.04643	152.286	0.53802
118.556	0.02011	152.429	0.82983
118.667	0.00855	152.571	-0.04131
118.778	-0.0019	152.714	-0.07344
118.889	-0.00798	152.857	-0.08883
119	-0.0159	153	-0.09084
119.111	0.79846	153.143	-0.09556
119.222	0.13337	153.286	2.65457
119.333	0.06058	153.429	-0.01485
119.444	0.02771	153.571	-0.06874
119.556	0.00715	153.714	-0.087
119.667	-0.00125	153.857	-0.09047
119.778	-0.00697	154	-0.09465
119.889	-0.01089	154.143	2.1118
120	-0.02049	154.286	0.01554
120.111	0.62293	154.429	-0.06214
120.222	0.08414	154.571	-0.08929
120.333	0.0306	154.714	-0.0936
120.444	0.01202	154.857	-0.0955
120.556	0.00422	155	-0.09512
120.667	-0.00338	155.143	2.36838
120.778	-0.01216	155.286	-0.03186
120.889	0.79201	155.429	-0.06913
121	0.11459	155.571	-0.08915
121.111	0.04206	155.714	-0.09306
121.222	0.01589	155.857	-0.09535
121.333	0.00427	156	-0.0713
121.444	-0.00192	156.143	2.30705
121.556	-0.00844	156.286	-0.02935
121.667	-0.02026	156.429	-0.07588
121.778	0.61703	156.571	-0.09092
121.889	0.08816	156.714	-0.09386
122	0.04376	156.857	-0.09888
122.111	0.02198	157	2.77752
122.222	0.00678	157.143	-0.02518
122.333	-0.00041	157.286	-0.07089
122.444	-0.00605	157.429	-0.08815
122.556	-0.0144	157.571	-0.09116
122.667	0.66884	157.714	-0.09581
122.778	0.10466	157.857	2.8366
122.889	0.03858	158	-0.02042
123	0.01386	158.143	-0.06888
123.111	-0.000187143	158.286	-0.08854
123.222	-0.00639	158.429	-0.09435
123.333	-0.00996	158.571	-0.09608
123.444	-0.01799	158.714	2.5753
123.556	0.83	158.857	-0.01364
123.667	0.13732	159	-0.06885
123.778	0.05728	159.143	-0.08727
123.889	0.02274	159.286	-0.09141
124	0.00987	159.429	-0.09547
124.111	0.00221	159.571	0.15784
124.222	-0.00437	159.714	1.20289
124.333	-0.01476	159.857	-0.0316
124.444	0.82624	160	-0.07781
124.556	0.13066	160.143	-0.08763
124.667	0.04477	160.286	-0.09303
124.778	0.01507	160.429	-0.09612
124.889	0.00452	160.571	2.53641
125	-0.000831429	160.714	0.30215
125.111	-0.00661	160.857	-0.03981
125.222	-0.01564	161	-0.08023
125.333	0.73166	161.143	-0.08969
125.444	0.15311	161.286	-0.09367
125.556	0.05548	161.429	0.08503
125.667	0.02226	161.571	1.30365
125.778	0.00838	161.714	-0.02939
125.889	0.00051	161.857	-0.07336
126	-0.00556	162	-0.08756
126.111	-0.01356	162.143	-0.09123
126.222	0.68637	162.286	-0.03747
126.333	0.10351	162.429	1.60639
126.444	0.05794	162.571	-0.03041
126.556	0.02509	162.714	-0.07225
126.667	0.01237	162.857	-0.08722
126.778	0.00235	163	-0.09105
126.889	-0.00491	163.143	-0.0822
127	-0.01655	163.286	1.82346
127.111	0.83027	163.429	-0.02997
127.222	0.14945	163.571	-0.07227
127.333	0.06326	163.714	-0.08678
127.444	0.03017	163.857	-0.09043
127.556	0.00919	164	-0.09627
127.667	0.000308571	164.143	2.06596
127.778	-0.00539	164.286	-0.02839
127.889	-0.01071	164.429	-0.0713
128	0.08529	164.571	-0.0868
128.111	0.35866	164.714	-0.08948
128.222	0.07323	164.857	-0.0925
128.333	0.02552	165	2.37578
128.444	0.00929	165.143	-0.00312
128.556	0.001	165.286	-0.06107
128.667	-0.00631	165.429	-0.08426
128.778	-0.01442	165.571	-0.08829
128.889	0.76631	165.714	-0.0928
129	0.13273	165.857	2.22505
129.111	0.05065	166	-0.00067619
129.222	0.01761	166.143	-0.06277
129.333	0.00464	166.286	-0.0882
129.444	-0.00166	166.429	-0.09248
129.556	-0.00609	166.571	-0.09401
129.667	-0.01394	166.714	0.15283
129.778	0.74476	166.857	1.63539
129.889	0.18419	167	-0.03193
130	0.06852	167.143	-0.08
130.111	0.02633	167.286	-0.09062
130.222	0.00991	167.429	-0.09326
130.333	0.000727143	167.571	-0.09498
130.444	-0.0057	167.714	2.71216
130.556	-0.01337	167.857	-0.00908
130.667	0.63864	168	-0.06239
130.778	0.09813	168.143	-0.08643
130.889	0.03949	168.286	-0.09047
131	0.0126	168.429	-0.09293
131.111	0.0024	168.571	2.38321
131.222	-0.00423	168.714	-0.00135
131.333	-0.01168	168.857	-0.06236
131.444	0.24031	169	-0.08504
131.556	0.25127	169.143	-0.09009
131.667	0.0728	169.286	-0.09285
131.778	0.02957	169.429	2.34
131.889	0.01136	169.571	-0.00428
132	0.00241	169.714	-0.0564
132.111	-0.0049	169.857	-0.08388
132.222	-0.01312	170	-0.09039
132.333	0.14832	170.143	-0.09303
132.444	0.41249	170.286	0.22914
132.556	0.07929	170.429	1.0935
132.667	0.03151	170.571	-0.03383
132.778	0.00988	170.714	-0.08191
132.889	3.57143e-05	170.857	-0.08887
133	-0.00484	171	-0.09145
133.111	-0.01095	171.143	-0.09317
133.222	-0.01675	171.286	1.85299
133.333	0.56044	171.429	0.24355
133.444	0.08321	171.571	-0.03519
133.556	0.03366	171.714	-0.07364
133.667	0.00998	171.857	-0.08689
133.778	-0.000454286	172	-0.08941
133.889	-0.00639	172.143	-0.09189
134	-0.01442	172.286	1.88807
134.111	0.71597	172.429	-0.03116
134.222	0.09998	172.571	-0.07567
134.333	0.0423	172.714	-0.08808
134.444	0.01887	172.857	-0.09038
134.556	0.00692	173	0.09815
134.667	0.000182857	173.143	1.30598
134.778	-0.00648	173.286	-0.03239
134.889	-0.01661	173.429	-0.07761
135	0.82546	173.571	-0.08647
135.111	0.11914	173.714	-0.08909
135.222	0.04503	173.857	0.48328
135.333	0.0143	174	0.85976
135.444	0.00371	174.143	-0.03491
135.556	-0.00298	174.286	-0.07864
135.667	-0.00933	174.429	-0.08758
135.778	-0.01334	174.571	-0.08961
135.889	0.54234	174.714	-0.09215
136	0.0833	174.857	2.75854
136.111	0.03184	175	-0.02507
136.222	0.009	175.143	-0.06584
136.333	0.00119	175.286	-0.0847
136.444	-0.00525	175.429	-0.088
136.556	-0.0122	175.571	-0.09045
136.667	-0.01758	175.714	2.51295
136.778	0.781	175.857	-0.02431
136.889	0.12958	176	-0.06743
137	0.04998	176.143	-0.08442
137.111	0.01948	176.286	-0.08713
137.222	0.00762	176.429	-0.08932
137.333	0.00148	176.571	2.35346
137.444	-0.00472	176.714	0.01717
137.556	-0.01173	176.857	-0.04278
137.667	0.72154	177	-0.07982
137.778	0.10502	177.143	-0.08512
137.889	0.04142	177.286	-0.08722
138	0.0124	177.429	2.32625
138.111	0.00195	177.571	0.00386
138.222	-0.00456	177.714	-0.04457
138.333	-0.01068	177.857	-0.07942
138.444	0.00466	178	-0.08441
138.556	0.47523	178.143	-0.08632
138.667	0.08142	178.286	2.3966
138.778	0.03163	178.429	0.00229
138.889	0.01007	178.571	-0.04819
139	0.00169	178.714	-0.07949
139.111	-0.00314	178.857	-0.08447
139.222	-0.00842	179	-0.08625
139.333	-0.01648	179.143	0.53753
139.444	0.79074	179.286	1.1083
139.556	0.1469	179.429	-0.02879
139.667	0.05519	179.571	-0.0699
139.778	0.03164	179.714	-0.08358
139.889	0.00818	179.857	-0.08595
140	-0.000497143	180	0.10751
140.111	-0.00781	180.143	1.56379
140.222	-0.01374	180.286	-0.02689
140.333	0.75971	180.429	-0.06955
140.444	0.11003	180.571	-0.08279
140.556	0.04291	180.714	-0.08378
140.667	0.01369	180.857	-0.08089
140.778	0.00309	181	2.0287
140.889	-0.00337	181.143	-0.02327
141	-0.01037	181.286	-0.06223
141.111	0.01717	181.429	-0.07135
141.222	0.45457	181.571	-0.07443
141.333	0.07723	181.714	-0.07781
141.444	0.03434	181.857	2.45949
141.556	0.01208	182	-0.01349
141.667	0.00302	182.143	-0.03355
141.778	-0.00279	182.286	-0.07207
141.889	-0.00843	182.429	-0.07513
142	-0.01813	182.571	-0.07833
142.111	0.77734	182.714	1.54583
142.222	0.15316	182.857	0.03854
142.333	0.05504	183	-0.03084
142.444	0.03177	183.143	-0.07121
142.556	0.01022	183.286	-0.07372
142.667	0.00135	183.429	-0.07481
142.778	-0.00541	183.571	0.91802
142.889	-0.01299	183.714	0.33621
143	0.67573	183.857	-0.02128
143.111	0.09987	184	-0.06249
143.222	0.04236	184.143	-0.07168
143.333	0.01897	184.286	-0.07453
143.444	0.00604	184.429	-0.07775
143.556	-0.000702857	184.571	2.81876
143.667	-0.00754	184.714	-0.01923
143.778	-0.0148	184.857	-0.03573
143.889	0.60121	185	-0.074
144	0.20199	185.143	-0.07734
144.111	0.06663	185.286	-0.07828
144.222	0.02692	185.429	0.79237
144.333	0.00651	185.571	1.44159
144.444	-0.00168	185.714	-0.02077
144.556	-0.00934	185.857	-0.06039
144.667	-0.01719	186	-0.07681
144.778	0.81867	186.143	-0.07826
144.889	0.11594	186.286	-0.08175
145	0.04647	186.429	2.84876
145.111	0.02014	186.571	0.07533
145.222	0.01053	186.714	-0.02861
145.333	5e-05	186.857	-0.06979
145.444	-0.00803	187	-0.07534
145.556	-0.01675	187.143	-0.07824
145.667	0.56606	187.286	-0.08073
145.778	0.08167	187.429	2.73362
145.889	0.03934	187.571	-0.00506
146	0.01405	187.714	-0.03823
146.111	0.00352	187.857	-0.0723
146.222	-0.00243	188	-0.07628
146.333	-0.00887	188.143	-0.07985
146.444	-0.01948	188.286	1.95397
146.556	0.68184	188.429	0.02901
146.667	0.0907	188.571	-0.03072
146.778	0.04149	188.714	-0.07047
146.889	0.01607	188.857	-0.07607
147	0.00524	189	-0.07864
147.111	-0.00119	189.143	0.72268
147.222	-0.00711	189.286	0.43774
147.333	-0.01774	189.429	-0.02456
147.444	0.7758	189.571	-0.06823
147.556	0.10242	189.714	-0.07377
147.667	0.04138	189.857	-0.07636
147.778	0.01488	190	-0.0789
147.889	0.00221	190.143	2.74438
148	-0.00304	190.286	0.00937
148.111	-0.00945	190.429	-0.03103
148.222	0.15147	190.571	-0.07091
148.333	0.29763	190.714	-0.07568
148.444	0.07451	190.857	-0.07749
148.556	0.03067	191	1.24607
148.667	0.00925	191.143	0.24228
148.778	-0.000117143	191.286	-0.01963
148.889	-0.00781	191.429	-0.05658
149	-0.01486	191.571	-0.07254
149.111	0.74837	191.714	-0.07649
149.222	0.13645	191.857	-0.07946
149.333	0.05179	192	2.87794
149.444	0.02115	192.143	-0.01174
149.556	0.00493	192.286	-0.02905
149.667	-0.00435	192.429	-0.06692
149.778	-0.00972	192.571	-0.07183
149.889	-0.01911	192.714	-0.0731
150	0.70883	192.857	0.27331
150.111	0.0921	193	2.74537
150.222	0.03895	193.143	-0.00431
150.333	0.01507	193.286	-0.03207
150.444	0.00159	193.429	-0.0703
150.556	-0.00349	193.571	-0.07459
150.667	-0.0084	193.714	-0.07715
150.778	-0.01832	193.857	0.40317
150.889	0.81807	194	0.98409
151	0.12001	194.143	-0.02392
151.111	0.06014	194.286	-0.06674
151.222	0.02393	194.429	-0.0722
151.333	0.00615	194.571	-0.07509
151.444	-0.00217	194.714	0.04093
151.556	-0.00815	194.857	1.44676
151.667	-0.01678	195	-0.02333
151.778	0.81633	195.143	-0.0628
151.889	0.10976	195.286	-0.06889
152	0.04599	195.429	-0.07129
152.111	0.02013	195.571	-0.07353
152.222	0.00289	195.714	2.78883
152.333	-0.00457	195.857	-0.00593
152.444	-0.01055	196	-0.03438
152.556	0.04374	196.143	-0.07246
152.667	0.43857	196.286	-0.07485
152.778	0.07969	196.429	-0.07678
152.889	0.02966	196.571	2.6219
153	0.00732	196.714	-0.00528
153.111	-0.00109	196.857	-0.03065
153.222	-0.00652	197	-0.06903
153.333	-0.01106	197.143	-0.07282
153.444	-0.0154	197.286	-0.07383
153.556	0.67924	197.429	2.64902
153.667	0.09135	197.571	-0.00464
153.778	0.03854	197.714	-0.02998
153.889	0.01564	197.857	-0.06607
154	0.00141	198	-0.07058
154.111	-0.00312	198.143	-0.07329
154.222	-0.00925	198.286	0.43271
154.333	-0.01747	198.429	0.87517
154.444	0.82511	198.571	-0.02069
154.556	0.18552	198.714	-0.06393
154.667	0.06591	198.857	-0.06952
154.778	0.02563	199	-0.07095
154.889	0.00932	199.143	-0.0741
155	-0.000732857	199.286	2.84613
155.111	-0.00862	199.429	-0.01391
155.222	-0.01476	199.571	-0.03404
155.333	0.67407	199.714	-0.06552
155.444	0.10521	199.857	-0.06845
155.556	0.05292	200	-0.07138
155.667	0.02202	200.143	2.816
155.778	0.0053	200.286	-0.01882
155.889	-0.000731429	200.429	-0.03128
156	-0.00602	200.571	-0.06637
156.111	-0.01295	200.714	-0.06821
156.222	0.21895	200.857	-0.07144
156.333	0.27935	201	2.70041
156.444	0.06792	201.143	-0.02087
156.556	0.02357	201.286	-0.03699
156.667	0.0086	201.429	-0.06791
156.778	-0.000962857	201.571	-0.07131
156.889	-0.00809	201.714	-0.07461
157	-0.01513	201.857	2.41038
157.111	0.6607	202	-0.0176
157.222	0.16197	202.143	-0.04034
157.333	0.0584	202.286	-0.06345
157.444	0.02193	202.429	-0.06646
157.556	0.00746	202.571	-0.06898
157.667	0.00061	202.714	2.47175
157.778	-0.00605	202.857	0.00533
157.889	-0.01398	203	-0.02379
158	0.05248	203.143	-0.0611
158.111	0.6183	203.286	-0.06537
158.222	0.09516	203.429	-0.06874
158.333	0.04135	203.571	1.28736
158.444	0.01756	203.714	0.34242
158.556	0.00257	203.857	-0.01671
158.667	-0.00248	204	-0.06026
158.778	-0.00807	204.143	-0.06416
158.889	-0.01741	204.286	-0.06784
159	0.56056	204.429	-0.07017
159.111	0.20997	204.571	2.88108
159.222	0.06778	204.714	-0.00295
159.333	0.03033	204.857	-0.02676
159.444	0.01067	205	-0.06452
159.556	6.85714e-05	205.143	-0.06732
159.667	-0.00702	205.286	-0.0708
159.778	-0.01455	205.429	2.02694
159.889	0.56913	205.571	0.02484
160	0.11627	205.714	-0.02632
160.111	0.0521	205.857	-0.06559
160.222	0.02097	206	-0.06796
160.333	0.00483	206.143	-0.07163
160.444	-0.00201	206.286	1.49475
160.556	-0.00901	206.429	0.6852
160.667	-0.01602	206.571	-0.01407
160.778	0.82499	206.714	-0.04328
160.889	0.13017	206.857	-0.06402
161	0.05197	207	-0.06653
161.111	0.02366	207.143	-0.0697
161.222	0.01274	207.286	2.87225
161.333	0.000194286	207.429	-0.00666
161.444	-0.00629	207.571	-0.03053
161.556	-0.01574	207.714	-0.06709
161.667	0.80347	207.857	-0.0705
161.778	0.10331	208	-0.07031
161.889	0.04213	208.143	1.95759
162	0.01733	208.286	0.07477
162.111	0.00268	208.429	-0.02315
162.222	-0.00537	208.571	-0.06374
162.333	-0.01332	208.714	-0.06776
162.444	0.54577	208.857	-0.07105
162.556	0.16467	209	1.36065
162.667	0.06079	209.143	0.09719
162.778	0.02289	209.286	-0.02252
162.889	0.01348	209.429	-0.06341
163	0.00137	209.571	-0.06732
163.111	-0.00741	209.714	-0.07032
163.222	-0.01524	209.857	1.365
163.333	0.77426	210	0.09157
163.444	0.12939	210.143	-0.02382
163.556	0.0509	210.286	-0.06623
163.667	0.01944	210.429	-0.071
163.778	0.00622	210.571	-0.07355
163.889	-0.00371	210.714	1.06721
164	-0.01215	210.857	0.2321
164.111	0.22976	211	-0.02272
164.222	0.25393	211.143	-0.06635
164.333	0.08602	211.286	-0.07319
164.444	0.0404	211.429	-0.07557
164.556	0.01825	211.571	0.74121
164.667	0.00233	211.714	0.51831
164.778	-0.00389	211.857	-0.01869
164.889	-0.0098	212	-0.06616
165	-0.01839	212.143	-0.07094
165.111	0.66446	212.286	-0.07508
165.222	0.08997	212.429	0.51264
165.333	0.0389	212.571	1.75353
165.444	0.01638	212.714	-0.01296
165.556	0.00168	212.857	-0.03239
165.667	-0.00708	213	-0.07282
165.778	-0.01434	213.143	-0.07759
165.889	0.68139	213.286	-0.08046
166	0.15073	213.429	2.83838
166.111	0.05789	213.571	0.10854
166.222	0.02435	213.714	-0.02101
166.333	0.00935	213.857	-0.0665
166.444	-0.00239	214	-0.07205
166.556	-0.00837	214.143	-0.0763
166.667	-0.01692	214.286	-0.07866
166.778	0.80803	214.429	2.80641
166.889	0.18735	214.571	-0.00128
167	0.06872	214.714	-0.03114
167.111	0.02585	214.857	-0.07308
167.222	0.01171	215	-0.07671
167.333	-0.00103	215.143	-0.07901
167.444	-0.00609	215.286	0.0365
167.556	-0.01311	215.429	1.60996
167.667	0.58861	215.571	-0.01049
167.778	0.22281	215.714	-0.02796
167.889	0.07806	215.857	-0.07004
168	0.03658	216	-0.07466
168.111	0.01934	216.143	-0.07717
168.222	0.003	216.286	2.18356
168.333	-0.00583	216.429	0.02399
168.444	-0.01457	216.571	-0.02452
168.556	0.81687	216.714	-0.0542
168.667	0.1161	216.857	-0.07422
168.778	0.05199	217	-0.07774
168.889	0.02464	217.143	-0.08044
169	0.01035	217.286	2.56495
169.111	-0.00157	217.429	-0.0124
169.222	-0.00988	217.571	-0.03389
169.333	0.46109	217.714	-0.0728
169.444	0.18668	217.857	-0.0775
169.556	0.07103	218	-0.07863
169.667	0.03776	218.143	1.41499
169.778	0.01684	218.286	0.33292
169.889	0.00724	218.429	-0.01989
170	-0.00555	218.571	-0.05846
170.111	-0.01501	218.714	-0.07368
170.222	0.81804	218.857	-0.07692
170.333	0.1153	219	0.30803
170.444	0.05144	219.143	1.28578
170.556	0.02052	219.286	-0.02189
170.667	0.00978	219.429	-0.04788
170.778	-0.00367	219.571	-0.07518
170.889	-0.01054	219.714	-0.07813
171	0.03972	219.857	-0.08072
171.111	0.47417	220	2.39416
171.222	0.08773	220.143	0.00949
171.333	0.03968	220.286	-0.02843
171.444	0.01757	220.429	-0.0747
171.556	0.00694	220.571	-0.07888
171.667	-0.00377	220.714	-0.08034
171.778	-0.01323	220.857	1.64943
171.889	0.61021	221	0.06927
172	0.19169	221.143	-0.02628
172.111	0.06773	221.286	-0.0708
172.222	0.03426	221.429	-0.079
172.333	0.01709	221.571	-0.08178
172.444	0.00761	221.714	0.15697
172.556	-0.00436	221.857	2.52054
172.667	-0.01331	222	-0.0145
172.778	0.8145	222.143	-0.0339
172.889	0.11733	222.286	-0.0767
173	0.05406	222.429	-0.08178
173.111	0.02589	222.571	-0.08406
173.222	0.01361	222.714	2.78825
173.333	0.00317	222.857	-0.00588
173.444	-0.0062	223	-0.03268
173.556	-0.01476	223.143	-0.07491
173.667	0.74607	223.286	-0.07923
173.778	0.15267	223.429	-0.08154
173.889	0.068	223.571	0.27071
174	0.03121	223.714	1.14162
174.111	0.01592	223.857	-0.02129
174.222	0.00592	224	-0.05871
174.333	-0.00571	224.143	-0.07916
174.444	0.0081	224.286	-0.08258
174.556	0.80327	224.429	0.05054
174.667	0.1117	224.571	1.43053
174.778	0.0563	224.714	-0.02155
174.889	0.0215	224.857	-0.04923
175	0.01411	225	-0.07846
175.111	0.00508	225.143	-0.08162
175.222	-0.00588	225.286	-0.03249
175.333	0.10899	225.429	1.84943
175.444	0.2922	225.571	-0.00919
175.556	0.07505	225.714	-0.0286
175.667	0.03217	225.857	-0.07207
175.778	0.01578	226	-0.07681
175.889	0.00549	226.143	-0.07931
176	-0.00205	226.286	2.37508
176.111	-0.01491	226.429	0.0093
176.222	0.78294	226.571	-0.02474
176.333	0.10046	226.714	-0.07039
176.444	0.04788	226.857	-0.07533
176.556	0.01865	227	-0.07849
176.667	0.00798	227.143	2.16328
176.778	0.000467143	227.286	0.17063
176.889	-0.01088	227.429	-0.02228
177	0.57599	227.571	-0.0464
177.111	0.15753	227.714	-0.07878
177.222	0.0651	227.857	-0.08219
177.333	0.03075	228	-0.07488
177.444	0.01464	228.143	1.8493
177.556	0.00434	228.286	-0.01999
177.667	-0.00936	228.429	-0.03314
177.778	0.77191	228.571	-0.07425
177.889	0.13331	228.714	-0.07755
178	0.06098	228.857	-0.07975
178.111	0.03119	229	2.54663
178.222	0.01754	229.143	0.32492
178.333	0.00637	229.286	-0.02406
178.444	-0.00278	229.429	-0.05264
178.556	0.12686	229.571	-0.07984
178.667	0.26539	229.714	-0.08235
178.778	0.07491	229.857	0.32475
178.889	0.03633	230	0.99616
179	0.01665	230.143	-0.01773
179.111	0.00965	230.286	-0.0363
179.222	0.00338	230.429	-0.07673
179.333	-0.01273	230.571	-0.08109
179.444	0.81943	230.714	-0.08361
179.556	0.10291	230.857	2.88702
179.667	0.05385	231	-0.01161
179.778	0.0241	231.143	-0.03478
179.889	0.01046	231.286	-0.07892
180	0.00258	231.429	-0.08181
180.111	-0.01262	231.571	-0.08483
180.222	0.84659	231.714	2.87397
180.333	0.14683	231.857	0.03026
180.444	0.07217	232	-0.02557
180.556	0.04011	232.143	-0.05013
180.667	0.02177	232.286	-0.07856
180.778	0.01153	232.429	-0.08142
180.889	0.00102	232.571	-0.08444
181	-0.01639	232.714	2.42038
181.111	0.81013	232.857	0.01812
181.222	0.10719	233	-0.02957
181.333	0.0554	233.143	-0.06751
181.444	0.02551	233.286	-0.07902
181.556	0.01283	233.429	-0.08204
181.667	0.00488	233.571	1.74055
181.778	-0.00471	233.714	0.03799
181.889	0.00981	233.857	-0.02883
182	0.5202	234	-0.07193
182.111	0.08925	234.143	-0.08134
182.222	0.04652	234.286	-0.08387
182.333	0.02052	234.429	1.73805
182.444	0.01122	234.571	0.03702
182.556	0.00288	234.714	-0.02559
182.667	-0.00494	234.857	-0.04502
182.778	0.04709	235	-0.07597
182.889	0.46924	235.143	-0.07885
183	0.10125	235.286	-0.08225
183.111	0.05734	235.429	2.32676
183.222	0.02495	235.571	-0.01931
183.333	0.01322	235.714	-0.03895
183.444	0.00372	235.857	-0.07551
183.556	-0.00412	236	-0.07841
183.667	-0.01501	236.143	-0.08065
183.778	0.78399	236.286	2.43819
183.889	0.1621	236.429	0.01563
184	0.06738	236.571	-0.03021
184.111	0.03259	236.714	-0.05855
184.222	0.01483	236.857	-0.07914
184.333	0.00611	237	-0.08168
184.444	-5.71429e-06	237.143	-0.04459
184.556	-0.0076	237.286	1.74656
184.667	-0.00946	237.429	-0.02161
184.778	0.73401	237.571	-0.04163
184.889	0.10152	237.714	-0.07964
185	0.05103	237.857	-0.08256
185.111	0.02158	238	-0.07239
185.222	0.01114	238.143	1.68443
185.333	0.00315	238.286	-0.02122
185.444	-0.0058	238.429	-0.03586
185.556	-0.0126	238.571	-0.07846
185.667	0.63919	238.714	-0.08225
185.778	0.09636	238.857	-0.08564
185.889	0.05128	239	2.614
186	0.02198	239.143	-0.00205
186.111	0.01141	239.286	-0.033
186.222	0.00564	239.429	-0.0539
186.333	-0.00082	239.571	-0.08189
186.444	-0.0119	239.714	-0.08517
186.556	0.85269	239.857	0.29764
186.667	0.12456	240	1.0531
186.778	0.0639	240.143	-0.02618
186.889	0.03196	240.286	-0.04956
187	0.01825	240.429	-0.08112
187.111	0.00785	240.571	-0.08366
187.222	0.000435714	240.714	-0.08592
187.333	-0.01017	240.857	2.85952
187.444	0.75069	241	-0.01262
187.556	0.32627	241.143	-0.03608
187.667	0.08831	241.286	-0.05564
187.778	0.04976	241.429	-0.08361
187.889	0.02646	241.571	-0.08629
188	0.01318	241.714	0.61538
188.111	0.00316	241.857	2.3799
188.222	-0.00516	242	-0.02235
188.333	-0.01426	242.143	-0.04119
188.444	0.82664	242.286	-0.05989
188.556	0.15228	242.429	-0.08304
188.667	0.0648	242.571	-0.08551
188.778	0.03181	242.714	-0.03981
188.889	0.01352	242.857	2.21714
189	0.00751	243	-0.01874
189.111	-0.0016	243.143	-0.03069
189.222	-0.01084	243.286	-0.05977
189.333	0.68556	243.429	-0.08096
189.444	0.17039	243.571	-0.08492
189.556	0.07048	243.714	1.96223
189.667	0.03612	243.857	0.02186
189.778	0.02066	244	-0.03154
189.889	0.0127	244.143	-0.06155
190	0.0049	244.286	-0.0833
190.111	-0.00769	244.429	-0.0878
190.222	0.70346	244.571	2.22108
190.333	0.16202	244.714	0.01237
190.444	0.06551	244.857	-0.02737
190.556	0.034	245	-0.0494
190.667	0.01635	245.143	-0.08154
190.778	0.00664	245.286	-0.08431
190.889	-0.00235	245.429	0.08435
191	-0.00957	245.571	1.40828
191.111	0.65674	245.714	-0.02551
191.222	0.17442	245.857	-0.0489
191.333	0.06775	246	-0.07999
191.444	0.03516	246.143	-0.0817
191.556	0.01587	246.286	-0.086
191.667	0.00681	246.429	2.77162
191.778	-0.00203	246.571	-0.00936
191.889	-0.00964	246.714	-0.03177
192	0.68256	246.857	-0.06774
192.111	0.18686	247	-0.08159
192.222	0.06917	247.143	-0.08531
192.333	0.03692	247.286	0.92213
192.444	0.01673	247.429	0.51091
192.556	0.00752	247.571	-0.02665
192.667	-0.00156	247.714	-0.05222
192.778	-0.01207	247.857	-0.0811
192.889	0.8492	248	-0.0853
193	0.14905	248.143	0.76465
193.111	0.06788	248.286	0.50227
193.222	0.03708	248.429	-0.02427
193.333	0.01873	248.571	-0.0485
193.444	0.00765	248.714	-0.07821
193.556	-0.00131	248.857	-0.08334
193.667	-0.01366	249	0.657
193.778	0.58733	249.143	0.50457
193.889	0.09284	249.286	-0.02663
194	0.04825	249.429	-0.05258
194.111	0.02484	249.571	-0.08226
194.222	0.01344	249.714	-0.08676
194.333	0.0053	249.857	0.69904
194.444	-0.00364	250	2.2901
194.556	0.01705	250.143	-0.01977
194.667	0.82976	250.286	-0.03766
194.778	0.12104	250.429	-0.06854
194.889	0.05953	250.571	-0.08118
195	0.02927	250.714	-0.08538
195.111	0.01431	250.857	2.84435
195.222	0.00505	251	-0.0165
195.333	-0.00422	251.143	-0.03345
195.444	-0.01555	251.286	-0.06842
195.556	0.84197	251.429	-0.07825
195.667	0.12812	251.571	-0.08323
195.778	0.06309	251.714	1.12848
195.889	0.03299	251.857	0.20787
196	0.01606	252	-0.02312
196.111	0.00716	252.143	-0.04881
196.222	-0.00137	252.286	-0.07672
196.333	-0.01123	252.429	-0.08173
196.444	0.84331	252.571	1.08001
196.556	0.13438	252.714	0.23436
196.667	0.06173	252.857	-0.02548
196.778	0.03136	253	-0.0517
196.889	0.01542	253.143	-0.07974
197	0.00678	253.286	-0.08411
197.111	-0.00217	253.429	0.90881
197.222	-0.01129	253.571	0.42782
197.333	0.67331	253.714	-0.02371
197.444	0.11354	253.857	-0.05012
197.556	0.06248	254	-0.07826
197.667	0.03192	254.143	-0.08161
197.778	0.01521	254.286	-0.08427
197.889	0.00649	254.429	2.84517
198	-0.0027	254.571	-0.0187
198.111	0.0504	254.714	-0.03346
198.222	0.41317	254.857	-0.05259
198.333	0.08306	255	-0.07834
198.444	0.04355	255.143	-0.0809
198.556	0.02101	255.286	0.90295
198.667	0.01119	255.429	0.5049
198.778	0.00298	255.571	-0.02248
198.889	-0.00481	255.714	-0.04832
199	0.11595	255.857	-0.07758
199.111	0.33807	256	-0.08158
199.222	0.07917	256.143	0.59343
199.333	0.04582	256.286	0.64915
199.444	0.02121	256.429	-0.02304
199.556	0.0114	256.571	-0.0477
199.667	0.00174	256.714	-0.07628
199.778	-0.01041	256.857	-0.07952
199.889	0.79436	257	0.56364
200	0.15555	257.143	0.71362
200.111	0.07185	257.286	-0.0167
200.222	0.04224	257.429	-0.02982
200.333	0.01993	257.571	-0.04803
200.444	0.0097	257.714	-0.07455
200.556	4.28571e-06	257.857	-0.07812
200.667	-0.01134	258	2.82346
200.778	0.84206	258.143	-0.00958
200.889	0.11658	258.286	-0.03076
201	0.05648	258.429	-0.04997
201.111	0.02657	258.571	-0.07583
201.222	0.01339	258.714	-0.07843
201.333	0.00647	258.857	0.82132
201.444	-0.0015	259	0.42521
201.556	-0.01219	259.143	-0.02278
201.667	0.81321	259.286	-0.044
201.778	0.10776	259.429	-0.07268
201.889	0.05613	259.571	-0.07556
202	0.02847	259.714	-0.0779
202.111	0.01358	259.857	2.74905
202.222	0.00507	260	-0.00627
202.333	-0.00528	260.143	-0.02483
202.444	0.43971	260.286	-0.04385
202.556	0.49989	260.429	-0.06985
202.667	0.09291	260.571	-0.07292
202.778	0.05204	260.714	2.83425
202.889	0.02576	260.857	-0.00569
203	0.01401	261	-0.02365
203.111	0.00643	261.143	-0.04854
203.222	-0.00123	261.286	-0.06889
203.333	-0.00761	261.429	-0.07269
203.444	0.55821	261.571	2.09312
203.556	0.08966	261.714	0.05709
203.667	0.05022	261.857	-0.01907
203.778	0.02472	262	-0.04318
203.889	0.01241	262.143	-0.06851
204	0.00409	262.286	-0.07435
204.111	-0.00843	262.429	1.01194
204.222	0.7924	262.571	1.59929
204.333	0.14468	262.714	-0.01259
204.444	0.07709	262.857	-0.03326
204.556	0.04397	263	-0.04966
204.667	0.02286	263.143	-0.07375
204.778	0.01128	263.286	-0.07717
204.889	0.00278	263.429	2.02905
205	-0.01051	263.571	-0.01295
205.111	0.83804	263.714	-0.0329
205.222	0.12219	263.857	-0.04766
205.333	0.06019	264	-0.07387
205.444	0.03395	264.143	-0.06859
205.556	0.02025	264.286	2.86133
205.667	0.0112	264.429	0.00267
205.778	0.00196	264.571	-0.02396
205.889	-0.01181	264.714	-0.04552
206	0.7615	264.857	-0.07223
206.111	0.10729	265	-0.07496
206.222	0.06082	265.143	2.55524
206.333	0.03735	265.286	0.0085
206.444	0.01908	265.429	-0.02437
206.556	0.01056	265.571	-0.04539
206.667	0.00349	265.714	-0.07279
206.778	-0.00685	265.857	-0.07585
206.889	0.75029	266	0.66106
207	0.15178	266.143	0.92417
207.111	0.06619	266.286	-0.01394
207.222	0.03445	266.429	-0.03539
207.333	0.01698	266.571	-0.05406
207.444	0.00874	266.714	-0.07057
207.556	-0.000402857	266.857	0.17332
207.667	-0.01075	267	1.23179
207.778	0.83233	267.143	-0.01392
207.889	0.12745	267.286	-0.04004
208	0.06361	267.429	-0.0529
208.111	0.03741	267.571	-0.0738
208.222	0.02086	267.714	0.30036
208.333	0.00955	267.857	1.00796
208.444	-0.00427	268	-0.01651
208.556	0.25968	268.143	-0.04083
208.667	0.2471	268.286	-0.05044
208.778	0.08478	268.429	-0.07397
208.889	0.05274	268.571	0.49298
209	0.02927	268.714	0.78018
209.111	0.01409	268.857	-0.01303
209.222	0.00472	269	-0.02469
209.333	-0.00627	269.143	-0.04352
209.444	0.63164	269.286	-0.06989
209.556	0.16922	269.429	-0.07209
209.667	0.06773	269.571	1.80003
209.778	0.03994	269.714	0.07382
209.889	0.02515	269.857	-0.02119
210	0.01179	270	-0.03831
210.111	0.00356	270.143	-0.04902
210.222	-0.00584	270.286	-0.07455
210.333	0.17735	270.429	-0.07679
210.444	0.34798	270.571	2.77562
210.556	0.07888	270.714	0.00906
210.667	0.04286	270.857	-0.02225
210.778	0.02379	271	-0.04461
210.889	0.01123	271.143	-0.05637
211	0.000545714	271.286	-0.07463
211.111	-0.01158	271.429	2.51289
211.222	0.82394	271.571	0.00891
211.333	0.10969	271.714	-0.02478
211.444	0.05592	271.857	-0.04644
211.556	0.02932	272	-0.07343
211.667	0.01335	272.143	-0.07618
211.778	0.00152	272.286	2.79378
211.889	-0.00976	272.429	0.00087619
212	0.5763	272.571	-0.02389
212.111	0.17787	272.714	-0.04462
212.222	0.06299	272.857	-0.05259
212.333	0.02711	273	-0.0757
212.444	0.0117	273.143	0.85348
212.556	0.00369	273.286	0.40405
212.667	-0.00196	273.429	-0.01933
212.778	-0.01568	273.571	-0.04426
212.889	0.77517	273.714	-0.05015
213	0.1375	273.857	-0.07533
213.111	0.05804	274	0.80656
213.222	0.02233	274.143	0.41408
213.333	0.01096	274.286	-0.02071
213.444	0.0021	274.429	-0.04547
213.556	-0.01069	274.571	-0.0515
213.667	0.00315	274.714	-0.0761
213.778	0.58993	274.857	0.86831
213.889	0.10413	275	0.40728
214	0.05218	275.143	-0.02123
214.111	0.02033	275.286	-0.0455
214.222	0.00878	275.429	-0.05233
214.333	-8e-05	275.571	-0.07608
214.444	-0.01179	275.714	-0.08012
214.556	0.19926	275.857	2.62035
214.667	0.29714	276	-0.0087
214.778	0.07103	276.143	-0.02944
214.889	0.03023	276.286	-0.04742
215	0.01212	276.429	-0.0729
215.111	0.00124	276.571	-0.07645
215.222	-0.00816	276.714	2.83076
215.333	-0.01986	276.857	0.02012
215.444	0.82924	277	-0.0212
215.556	0.11964	277.143	-0.0445
215.667	0.05417	277.286	-0.05024
215.778	0.022	277.429	-0.07524
215.889	0.00872	277.571	1.43257
216	7.71429e-05	277.714	0.06943
216.111	-0.00881	277.857	-0.01936
216.222	-0.02024	278	-0.04336
216.333	0.83081	278.143	-0.04969
216.444	0.13148	278.286	-0.07484
216.556	0.06607	278.429	0.7102
216.667	0.02689	278.571	1.67022
216.778	0.01198	278.714	-0.01375
216.889	-0.000244286	278.857	-0.03407
217	-0.01016	279	-0.05077
217.111	-0.01868	279.143	-0.07527
217.222	0.57344	279.286	-0.07751
217.333	0.22336	279.429	2.12405
217.444	0.07687	279.571	-0.01073
217.556	0.03256	279.714	-0.02587
217.667	0.01161	279.857	-0.04617
217.778	0.00192	280	-0.05453
217.889	-0.00766	280.143	-0.07591
218	-0.01793	280.286	2.42714
218.111	0.78874	280.429	0.01356
218.222	0.15531	280.571	-0.02211
218.333	0.0613	280.714	-0.0459
218.444	0.03027	280.857	-0.05199
218.556	0.01262	281	-0.0732
218.667	0.00311	281.143	2.67025
218.778	-0.00562	281.286	0.01282
218.889	-0.01126	281.429	-0.01737
219	-0.02206	281.571	-0.0404
219.111	0.83677	281.714	-0.04704
219.222	0.18657	281.857	-0.07028
219.333	0.06495	282	-0.07189
219.444	0.02779	282.143	2.88197
219.556	0.01239	282.286	-0.000104762
219.667	0.00467	282.429	-0.02458
219.778	-0.00569	282.571	-0.04515
219.889	-0.01301	282.714	-0.04964
220	-0.02065	282.857	-0.07227
220.111	0.5861	283	0.89132
220.222	0.08729	283.143	0.31518
220.333	0.04777	283.286	-0.01869
220.444	0.01823	283.429	-0.04251
220.556	0.00693	283.571	-0.05014
220.667	-0.00555	283.714	-0.05739
220.778	-0.01182	283.857	-0.07493
220.889	-0.0217	284	2.87149
221	0.82411	284.143	0.01273
221.111	0.15718	284.286	-0.02184
221.222	0.06345	284.429	-0.04549
221.333	0.02539	284.571	-0.05087
221.444	0.00943	284.714	-0.05363
221.556	-0.00295	284.857	2.18502
221.667	-0.00846	285	0.02131
221.778	-0.01888	285.143	-0.0229
221.889	0.80769	285.286	-0.04648
222	0.13464	285.429	-0.05177
[truncated: 16,002 more rows]

## Sheet: Fig. 5
Time(s)	∆C/C0		Time(s)	∆C/C0		Time(s)	∆C/C0		Time(s)	∆C/C0		Time(s)	∆C/C0		Time(s)	∆C/C0		Time(s)	∆C/C0		Time(s)	∆C/C0
0	-0.00186		0	-1.80449e-16		0	0		0	0.05485		0	0		0	0.00444		0	1.13492e-16		0	2.21775e-16
0.311	-0.00206		0.206	-0.00037459		0.175	-0.00147		0.225	0.06218		0.166	-0.01027		0.201	0.00372		0.205	0.01329		0.213	-0.000319924
0.532	0.00514		0.424	0.00871		0.396	-0.00357		0.404	0.04917		0.377	-0.01668		0.409	0.0035		0.386	0.01239		0.444	0.00028481
0.764	0.01336		0.634	0.02274		0.607	-0.00384		0.617	0.03912		0.59	-0.01788		0.619	0.00295		0.596	0.00771		0.605	0.000497443
0.997	0.0571		0.849	0.09775		0.82	-0.00504		0.828	0.02798		0.799	-0.02058		0.83	0.00227		0.758	0.0026		0.767	6.04734e-05
1.226	0.10148		1.06	0.08006		1.03	-0.00609		0.989	0.02043		1.012	-0.0302		1.058	0.00209		0.985	-0.00373		0.979	1.95076e-05
1.456	0.09168		1.291	0.06113		1.191	-0.00717		1.202	0.01378		1.236	-0.02609		1.288	0.00192		1.2	-0.00639		1.193	-0.000204829
1.688	0.12954		1.47	0.05218		1.355	-0.00832		1.365	0.00668		1.468	-0.0354		1.451	0.00155		1.412	-0.01097		1.387	-0.000265303
1.919	0.12153		1.696	0.04389		1.566	-0.00958		1.578	-1.689e-16		1.698	-0.04324		1.664	0.10348		1.63	-0.00952		1.577	-0.000345284
2.15	0.07546		1.908	0.03478		1.775	-0.01067		1.788	-0.00574		1.931	-0.03154		1.89	0.6403		1.794	-0.01033		1.789	-0.00067106
2.381	0.04624		2.076	0.03154		1.935	-0.01175		2.001	-0.01001		2.161	-0.03378		2.118	0.08645		2.005	-0.01261		2.013	-0.000932461
2.613	0.02251		2.293	0.02655		2.147	-0.01315		2.225	-0.0147		2.39	-0.04366		2.341	0.03051		2.215	-0.02862		2.223	-0.00127
2.844	0.0137		2.505	0.01992		2.367	-0.0143		2.458	-0.02045		2.554	-0.03977		2.573	0.02298		2.43	1.53625		2.439	-0.00147
3.074	0.00715		2.716	0.01594		2.581	-0.01552		2.687	-0.0237		2.764	-0.03967		2.802	0.01451		2.662	1.87379		2.67	-0.0019
3.305	0.00607		2.932	0.0084		2.805	-0.01645		2.851	-0.02562		2.931	-0.0387		3.031	0.01103		2.893	0.60338		2.858	-0.0023
3.536	0.00532		3.165	0.000758704		3.032	0.42512		3.012	-0.02695		3.145	-0.04072		3.263	0.00842		3.124	-0.00647		3.062	-0.00232
3.698	0.00461		3.392	-0.000225389		3.262	0.56556		3.238	-0.02105		3.355	-0.04322		3.493	0.00624		3.354	1.97649		3.277	-0.00285
3.857	0.00547		3.623	0.02125		3.421	0.65016		3.454	-0.02252		3.573	-0.04246		3.653	0.00508		3.587	1.55004		3.497	-0.0025
4.068	0.00561		3.854	0.08601		3.633	0.65383		3.667	-0.02591		3.8	-0.0442		3.816	0.00418		3.817	0.04741		3.721	0.29815
4.283	0.00558		4.085	0.09782		3.792	0.655		3.877	-0.02714		3.963	-0.04601		4.028	0.65397		4.048	0.41404		3.895	1.87713
4.492	0.00843		4.316	0.07332		4.004	0.65619		4.097	0.08926		4.175	-0.04576		4.242	0.42974		4.278	1.83002		4.109	0.23049
4.717	0.00839		4.548	0.05423		4.215	0.67705		4.258	0.69435		4.391	-0.04511		4.452	0.0772		4.509	0.6444		4.317	0.06944
4.949	0.01136		4.708	0.03908		4.439	0.71758		4.468	1.44951		4.629	-0.04553		4.672	0.02992		4.74	0.16178		4.543	0.03262
5.177	0.04452		4.918	0.02395		4.669	0.72538		4.629	2.25464		4.788	-0.04582		4.832	0.01525		4.971	-0.02382		4.714	0.01301
5.418	0.08101		5.078	0.02202		4.9	0.72953		4.843	2.94456		4.999	-0.04672		5.043	0.01235		5.13	0.02233		4.921	0.00592
5.639	0.08087		5.291	0.01774		5.132	0.73273		5.004	3.56699		5.211	-0.04728		5.262	0.00661		5.342	0.01033		5.133	0.00169
5.87	0.13259		5.502	0.01302		5.363	0.73342		5.215	3.93843		5.441	-0.04806		5.495	0.0038		5.567	0.000872503		5.361	2.21775e-16
6.101	0.10572		5.66	0.0111		5.597	0.73622		5.427	4.05586		5.608	-0.04758		5.727	0.00235		5.729	-0.00661		5.592	-0.000546211
6.26	0.07868		5.851	0.00636		5.824	0.73961		5.641	4.11193		5.821	-0.0496		5.956	0.00159		5.942	-0.01202		5.752	-0.0019
6.475	0.05061		6.036	-0.00112		6.055	0.74055		5.865	4.14987		6.031	-0.04809		6.119	0		6.152	-0.01591		5.914	-0.00333
6.691	0.02711		6.25	-0.00177		6.286	0.74364		6.096	4.15917		6.262	-0.04715		6.312	-0.00187		6.384	-0.01895		6.134	-0.00392
6.932	0.01683		6.461	0.00161		6.517	0.74762		6.261	4.16108		6.494	-0.0089		6.504	-0.00194		6.546	-0.02264		6.347	-0.00473
7.154	0.01432		6.675	0.04638		6.748	0.74681		6.472	4.16075		6.724	0.34243		6.716	-0.00296		6.707	-0.02564		6.557	-0.0056
7.319	0.0126		6.904	0.07158		6.979	0.74664		6.631	4.15861		6.957	0.58001		6.932	-0.00417		6.918	-0.02827		6.771	-0.00574
7.477	0.0112		7.135	0.08092		7.137	0.74718		6.841	4.15647		7.185	0.72732		7.095	0.78093		7.13	-0.03048		7.002	-0.0061
7.692	0.00993		7.293	0.06456		7.348	0.74563		7.053	4.154		7.347	0.75588		7.305	0.17317		7.344	-0.03247		7.162	-0.00671
7.905	0.00975		7.503	0.04396		7.508	0.74791		7.319	4.15047		7.508	0.7534		7.516	0.09014		7.507	-0.03432		7.373	-0.00696
8.066	0.00536		7.726	0.02895		7.721	0.76512		7.53	4.1472		7.72	0.73677		7.677	0.01096		7.72	-0.01558		7.596	-0.00724
8.275	0.00199		7.957	0.02184		7.88	0.76673		7.695	4.14491		7.93	0.72792		7.886	-0.0121		7.93	1.31726		7.823	-0.00772
8.486	0.0012		8.193	0.01009		8.091	0.76596		7.906	4.14414		8.092	0.7211		8.048	-0.01015		8.151	1.87305		8.002	-0.00781
8.648	0.00159		8.418	0.00211		8.303	0.7672		8.119	4.14363		8.302	0.71795		8.26	-0.01119		8.31	1.90228		8.208	-0.00805
8.858	0.00187		8.65	0		8.464	0.76754		8.283	4.1431		8.524	0.71108		8.471	-0.01238		8.47	1.96523		8.368	-0.00844
9.07	0.00322		8.883	-0.00258		8.681	0.76727		8.494	4.14331		8.685	0.71098		8.682	-0.01327		8.681	2.15487		8.578	-0.00907
9.281	0.03368		9.111	-0.00367		8.892	0.76615		8.705	4.14331		8.895	0.71018		8.902	-0.01405		8.892	2.2042		8.737	1.73749
9.515	0.06749		9.342	-0.00328		9.107	0.76573		8.918	4.15231		9.106	0.71183		9.061	-0.01462		9.104	0.86157		8.949	0.34194
9.743	0.05991		9.579	-0.00277		9.339	0.76616		9.144	4.26573		9.317	0.7096		9.22	-0.01518		9.329	0.20845		9.16	0.0708
9.91	0.13356		9.805	-0.00333		9.569	0.77846		9.374	4.12444		9.543	0.7108		9.431	-0.01604		9.488	0.05996		9.32	0.04021
10.121	0.09726		9.968	0.01013		9.803	0.87438		9.535	3.75802		9.775	0.71051		9.645	-0.01687		9.702	0.00599		9.532	0.02323
10.337	0.06666		10.177	0.04862		10.051	1.5466		9.695	2.73944		10.005	0.7109		9.858	-0.01762		9.92	-0.02307		9.743	0.00935
10.565	0.0469		10.344	0.10102		10.263	2.15853		9.907	1.29792		10.165	0.71102		10.023	-0.01833		10.151	-0.03588		9.954	0.00343
10.794	0.03295		10.558	0.06108		10.421	2.27253		10.12	0.73424		10.376	0.71099		10.241	-0.01905		10.388	-0.03687		10.181	-0.0018
10.954	0.02146		10.749	0.03747		10.635	2.33058		10.28	0.62213		10.597	0.7111		10.452	0.70683		10.612	-0.03871		10.417	-0.00363
11.118	0.01535		10.937	0.02379		10.852	2.38142		10.492	0.43796		10.826	0.71145		10.613	0.30807		10.771	-0.04031		10.577	-0.00474
11.33	0.01209		11.148	0.01641		11.014	2.39676		10.704	0.3425		11.057	0.71172		10.824	0.04299		10.93	-0.04131		10.789	-0.00588
11.573	0.00941		11.366	0.0107		11.178	2.38849		10.863	0.4263		11.289	0.71165		10.984	-0.00862		11.14	-0.04208		11.002	-0.00673
11.807	0.00542		11.58	0.00637		11.389	2.36995		11.075	0.40246		11.519	0.71168		11.205	-0.02916		11.351	-0.04282		11.233	-0.00719
12.028	0.0057		11.804	0.00349		11.599	2.35133		11.285	0.27349		11.75	0.71169		11.415	-0.01757		11.519	-0.04346		11.396	-0.00796
12.24	0.0061		12.035	0.00203		11.758	2.34029		11.522	0.15368		11.91	0.71196		11.626	-0.01815		11.731	-0.04483		11.555	-0.00849
12.437	0.00558		12.205	0.00168		11.971	2.32747		11.731	0.13428		12.125	0.71193		11.849	-0.02066		11.943	-0.04308		11.767	-0.00908
12.677	0.00572		12.416	0.05652		12.186	2.31839		11.9	0.13555		12.341	0.71227		12.009	-0.02385		12.155	-0.0407		11.978	-0.00964
12.894	0.00588		12.575	0.11201		12.373	2.30895		12.112	0.17198		12.572	0.71224		12.168	-0.02616		12.315	-0.04487		12.194	-0.01011
13.125	0.00644		12.786	0.0748		12.579	2.29049		12.274	0.19148		12.803	0.71229		12.381	-0.02896		12.476	-0.04586		12.413	-0.0107
13.356	0.03455		12.998	0.04258		12.791	2.2457		12.485	0.20576		13.033	0.71267		12.594	-0.02926		12.687	1.83156		12.572	-0.01127
13.587	0.08426		13.157	0.02251		13.004	2.28392		12.696	0.20869		13.264	0.71275		12.805	-0.02915		12.896	2.08405		12.735	-0.0118
13.819	0.0811		13.376	0.01047		13.167	2.26585		12.911	0.20476		13.495	0.71251		13.03	0.74798		13.064	0.22763		12.947	-0.01366
14.056	0.1296		13.535	0.00405		13.386	2.16794		13.141	0.19763		13.726	0.7122		13.26	0.23318		13.279	0.0536		13.17	-0.0124
14.28	0.09491		13.751	0.00155		13.596	2.16387		13.371	0.1912		13.886	0.71225		13.421	0.06673		13.492	1.18361		13.382	-0.01241
14.44	0.0697					13.757	2.23003		13.602	0.18545		14.047	0.71206		13.62	0.02175		13.706	1.68182		13.594	-0.01283
14.65	0.04863					13.971	2.19967		13.767	0.18166		14.266	0.71005		13.779	0.0045		13.921	1.79061		13.77	-0.01593
14.883	0.02872					14.191	2.21962		13.929	0.17813		14.49	0.7034		13.94	-0.00345		14.153	1.75114		13.984	0.22539
15.105	0.02106					14.351	2.25818		14.142	0.17389		14.693	0.69727		14.15	-0.00719		14.382	1.5882		14.195	1.68139
15.332	0.01593					14.572	2.22413		14.357	0.17225		14.906	0.68804		14.362	-0.00995		14.613	1.10281		14.355	0.2455
15.563	0.0107					14.783	2.21603		14.516	0.19153		15.139	0.67856		14.573	-0.01187		14.844	0.14653		14.569	0.08059
15.733	0.00873					14.994	2.14921		14.73	0.2566		15.388	0.66332		14.799	-0.01211		15.076	0.06158		14.728	0.01982
15.944	0.00963					15.155	2.03328		14.941	0.38587		15.6	0.33857		15.031	-0.01295		15.305	0.02233		14.939	-0.00333
						15.366	2.07949		15.102	0.73179		15.831	0.07426		15.269	-0.01427		15.537	0.02846		15.149	0.00232
						15.578	2.06739		15.313	2.3655		16.062	0.01134		15.494	-0.01466		15.7	0.01917		15.318	-0.00128
						15.799	2.13831		15.53	3.37887		16.226	0.00146		15.729	0.69133		15.909	0.01285		15.529	-0.00567
						15.96	1.67572		15.736	3.67601		16.433	-0.00217		15.954	0.04881		16.126	0.00777		15.718	-0.00807
						16.171	1.66848		15.896	3.78083		16.595	-0.00534		16.185	0.00646		16.357	0.00431		15.95	-0.00931
						16.33	1.50752		16.11	3.90611		16.805	-0.00589		16.416	-0.00573		16.526	-0.000708784		16.111	-0.01073
						16.545	1.30831		16.322	3.99712		16.965	-0.00925		16.647	-0.0108		16.77	-0.00404		16.326	-0.01142
						16.712	1.3517		16.55	4.02719		17.178	-0.01281		16.881	-0.01497		16.98	-0.00656		16.486	-0.01226
						16.919	1.34377		16.784	4.02689		17.39	-0.01387		17.11	-0.01744		17.14	-0.00694		16.699	-0.01309
						17.13	1.33175		17.012	4.02647		17.608	-0.01519		17.341	-0.01733		17.351	-0.00795		16.933	-0.01376
						17.29	1.31951		17.171	4.02564		17.83	-0.01742		17.523	-0.01868		17.567			17.129	-0.01479
						17.504	1.31935		17.384	4.03075		17.989	-0.01962		17.731	-0.01966		17.775			17.362	-0.01602
						17.714	1.31058		17.603	4.03069		18.148	-0.02056		17.891	-0.01955		17.996			17.523	-0.01668
						17.875	1.30003		17.761	4.03557		18.36	-0.02282					18.16			17.685	-0.01799
						18.084	1.29153		17.977	4.04166		18.572	-0.02453					18.371			17.895	-0.01873
						18.244	1.28522		18.192	4.04371		18.781	-0.0254					18.586			18.111	-0.01859
						18.466	1.27871		18.352	4.03982		19.01	-0.02706					18.746			18.272	-0.0189
						18.684	1.27221		18.51	4.03465		19.241	-0.02872					18.909			18.485	0.00828
						18.888	1.26518		18.721	4.03001		19.474	-0.0293					19.123			18.695	1.12281
						19.049	1.26288		18.94	4.02538		19.704	-0.03122					19.335			18.856	1.88314
						19.258	1.26265		19.153	4.01765		19.937	-0.03324					19.549			19.068	1.87543
						19.418	1.27439		19.372	4.01206		20.164	-0.03431					19.766			19.28	1.87296
						19.631	1.30763		19.602	4.00541		20.396	-0.03576					19.926			19.439	1.87274
						19.841	1.3227		19.763	3.9951		20.628	-0.03761					20.086			19.659	1.87019
						20.001	1.3321		19.924	3.98648		20.793	-0.03847					20.296			19.898	1.86656
						20.231	1.34069		20.137	3.97403		20.953	-0.03948					20.508			20.11	1.86318
						20.441	1.3373		20.35	3.96096		21.165	-0.04055					20.717			20.32	1.85154
						20.601	1.33173		20.513	3.94961		21.38	-0.04063					20.945			20.48	1.84693
						20.816	1.32825		20.722	3.93576		21.595	-0.04116					21.177			20.692	1.84401
						21.024	1.3267		20.937	3.92028		21.806	-0.04207					21.408			20.852	1.84198
						21.192	1.32704		21.158	3.89871		21.965	-0.04281					21.639			21.067	1.83921
						21.407	1.328		21.332	3.86843		22.177	-0.04368					21.87			21.288	1.83753
						21.624	1.33527		21.541	3.75825		22.336	-0.04431					22.103			21.499	1.83517
						21.783	1.34286		21.758	3.11564		22.549	-0.04312					22.334			21.716	1.83525
						22.001	1.34176		21.968	1.74639		22.709	-0.04268					22.563			21.876	1.83513
						22.204	1.33979		22.195	0.44705		22.92	-0.04256					22.794			22.09	1.83482
						22.364	1.33877		22.422	0.00534		23.13	-0.04208					23.025			22.252	1.83815
						22.583	1.33807		22.589	-0.00787		23.343	-0.04189					23.256			22.466	1.84059
						22.798	1.33669		22.798	-0.02598		23.504	-0.04191					23.487			22.677	1.83829
						22.961	1.33399		22.96	-0.05036		23.704	-0.04213					23.719			22.841	1.83712
						23.171	1.33007		23.175	-0.05863		23.936	-0.042					23.95			23.053	1.84256
						23.389	1.32629		23.386	-0.07316		24.096	-0.04222					24.18			23.27	1.83849
						23.599	1.32123		23.546	-0.08616		24.306	-0.04204					24.411			23.485	1.84245
						23.758	0.60809		23.768	-0.0957		24.524	-0.04198					24.641			23.643	1.83813
						23.969	0.36366		24.025	-0.11344		24.685	-0.04213					24.874			23.854	1.83328
						24.142	0.19919		24.235	-0.13145		24.898	-0.04229					25.107			24.075	1.83053
						24.357	0.11811		24.447	-0.14513		25.069	-0.0417					25.336			24.239	1.82062
						24.567	0.08472		24.675	-0.15235		25.285	-0.04172					25.566			24.449	0.7353
						24.728	0.06373		24.884	-0.1578		25.499	-0.04184					25.796			24.612	0.2286
						24.94	0.05568		25.044	-0.16153		25.664	-0.04173					25.956			24.833	0.11571
						25.154	0.05086		25.238	-0.15766		25.876	-0.04178					26.119			25.055	0.06322
						25.321	0.04757		25.4	-0.1135		26.087	-0.04197					26.337			25.267	0.04569
						25.528	0.0455		25.598	0.20711		26.297	-0.04174					26.556			25.43	0.03391
						25.738	0.04387		25.757	1.22614		26.456	-0.04167					26.774			25.638	0.02892
						25.951	0.04188		25.97	1.95979		26.668	-0.04178					26.986			25.849	0.02563
						26.175	0.04044		26.143	2.32809		26.88	-0.04163					27.147			26.075	0.02352
						26.338	0.03836		26.355	2.47158		27.111	-0.04143					27.357			26.234	0.02044
						26.498	0.03662		26.545	2.56402		27.342	-0.04152					27.598			26.399	0.01897
						26.711	0.03505		26.705	2.6607		27.574	-0.04115					27.794			26.612	0.01889
						26.922	0.03384		26.916	2.66472		27.808	-0.04086					28.025			26.824	0.01724
						27.135	0.03573		27.084	2.66073		28.035	-0.04062					28.189			26.986	0.01545
						27.354	0.04023		27.293	2.66278		28.266	-0.04043					28.401			27.199	0.01521
						27.519	0.04069		27.452	2.6845		28.497	-0.0392					28.617			27.411	0.01458
						27.731	0.03931		27.662	2.65518		28.728	-0.0392					28.778			27.57	0.01348
						27.889	0.03516		27.88	2.64713		28.894	-0.0389					28.99			27.78	0.002
									28.09	2.66335		29.053	-0.0382					29.151			27.993	-0.00238
									28.249	2.69556		29.263	-0.03829					29.363			28.152	1.65059
									28.409	2.71229		29.475	-0.03799					29.575			28.363	0.46009
									28.627	2.70052		29.676	-0.03792					29.796			28.521	0.13698
									28.851	2.67818		29.906	-0.03811					30.028			28.732	0.07562
									29.065	2.66917		30.071	-0.03785					30.26			28.95	0.05105
									29.225	2.65277		30.231	-0.03823					30.489			29.156	0.04052
									29.435	2.63289		30.445	-0.03855					30.721			29.385	0.03321
									29.666	2.60273		30.656	-0.03911					30.954			29.617	0.03054
									29.881	2.5888		30.815	-0.03946					31.186			29.845	0.0279
									30.093	2.55843		31.03	-0.05389					31.414			30.075	0.02683
									30.252	2.54785		31.244	-0.04268					31.574			30.304	0.02425
									30.464	2.53044		31.46	-0.03806					31.787			30.535	0.02155
									30.626	2.50836		31.675	0.38466					32.004			30.767	0.02054
									30.839	2.48106		31.916	1.20822					32.236			30.934	0.02067
									31.05	2.45791		32.08	1.3544					32.471			31.148	0.02026
									31.21	2.43173		32.293	1.38633					32.697			31.312	0.01935
									31.422	2.42371		32.505	1.41308					32.927			31.52	0.01859
									31.583	2.43236		32.729	1.41032					33.087			31.715	0.01851
									31.795	2.52729		32.89	1.41611					33.247			31.947	0.01827
									32.017	2.55956		33.054	1.42174					33.457			32.113	0.01767
									32.228	2.55186		33.267	1.44978					33.671			32.326	0.01782
									32.392	2.54212		33.477	1.45855					33.83			32.537	0.01748
									32.604	2.52711		33.64	1.45452					34.041			32.705	0.01686
									32.767	2.50658		33.851	1.45019					34.234			32.919	0.0162
									32.977	2.48712		34.066	1.44771					34.416			33.088	0.01566
									33.192	2.46766		34.277	1.44541					34.626			33.302	0.01525
									33.351	2.44805		34.439	1.44258					34.837			33.519	0.00987
									33.566	2.42083		34.654	1.44125					35.059			33.681	0.85591
									33.775	2.39141		34.859	1.4404					35.222			33.889	1.94108
									33.935	2.30114		35.088	1.43888					35.417			34.1	1.94537
									34.146	1.71338		35.318	1.43784					35.603			34.312	1.95335
									34.357	1.00212		35.549	1.43597					35.812			34.537	1.949
									34.516	0.2869		35.78	1.4339					35.971			34.765	1.93507
									34.729	0.00566		36.012	1.43164					36.182			34.996	1.93163
									34.935	-0.07357		36.174	1.42935					36.394			35.161	1.92849
									35.157	-0.15709		36.332	1.42742					36.595			35.371	1.91833
									35.387	-0.17088		36.55	1.42544					36.759			35.587	1.91259
									35.547	-0.16331		36.758	1.42389					36.971			35.818	1.9205
									35.71	-0.16945		36.969	1.42211					37.137			35.989	1.90631
									35.921	-0.18346		37.129	1.41996					37.348			36.2	1.90206
									36.139	-0.19422		37.341	1.41937					37.508			36.359	1.90101
									36.299	-0.20132		37.5	1.41857					37.721			36.57	1.90013
									36.514	-0.21039		37.714	1.41717								36.731	1.90848
									36.727	-0.21672		37.929	1.41556								36.944	1.89252
									36.937	-0.22815		38.14	1.41474								37.156	1.88971
									37.096	-0.24398		38.305	1.41243								37.365	1.88755
									37.309	-0.25052		38.513	1.40984								37.588	1.88958
									37.474	-0.25585		38.728	1.40815								37.817	1.89508
									37.684	-0.26241		38.959	1.40577								37.976	1.89395
									37.9	-0.26825		39.19	1.40451								38.188	1.8935
									38.065	-0.27192		39.349	1.40301								38.349	1.89094
									38.278	-0.18139		39.509	1.40038								38.56	1.88632
									38.489	0.02302		39.72	1.3976								38.72	1.88431
									38.647	0.65586		39.939	1.39507								38.931	1.88066
									38.863	1.5463		40.148	1.39311								39.142	1.87522
									39.074	2.25693		40.37	1.39135								39.304	1.86652
									39.291	2.78054		40.6	1.39003								39.514	1.85351
									39.513	2.88382		40.831	1.38602								39.727	1.83082
									39.674	2.88447		41.062	1.37976								39.945	0.97416
									39.836	2.87791		41.293	1.36988								40.176	0.2759
									40.051	2.8791		41.524	1.35296								40.335	0.15083
									40.263	2.87749		41.755	1.33293								40.547	0.10642
									40.426	2.8676		41.986	1.28957								40.766	0.08193
									40.643	2.85102		42.217	1.00464								40.933	0.07062
									40.862	2.83218		42.448	0.70343								41.141	0.05653
									41.076	2.81821		42.679	0.54348								41.299	0.0586
									41.289	2.79944		42.91	0.40869								41.514	0.05859
									41.512	2.77923		43.141	0.24573								41.673	0.05936
									41.746	2.75525		43.372	0.13893								41.884	0.05787
									41.911	2.73745		43.605	0.03583								42.095	0.05636
									42.124	2.7261		43.834	0.00924								42.254	0.05426
									42.285	2.71588		44.065	-0.00159								42.47	0.05495
									42.49	2.70403		44.295	-0.00608								42.663	0.05403
									42.702	2.68959		44.526	-0.00563								42.824	0.05317
									42.867	2.67925		44.686	-0.00759								43.035	0.05258
									43.084	2.66611		44.896	-0.00901								43.194	0.05181
									43.243	2.65167		45.116	-0.00843								43.41	0.05121
									43.454	2.63524		45.347	-0.00944								43.613	0.05114
									43.672	2.61899		45.508	-0.01058								43.771	0.05111
									43.833	2.60719		45.721	-0.01082								43.983	0.0506
									44.044	2.59391		45.938	-0.01154								44.149	0.04962
									44.259	2.57766		46.097	-0.01283								44.366	0.04957
									44.474	2.56259		46.309	-0.0134								44.578	0.0494
									44.639	2.55406		46.528	-0.01386								44.737	0.04874
									44.85	2.54138		46.692	-0.01487								44.948	0.0484
									45.014	2.49181		46.895	-0.01597								45.11	0.04816
									45.226	2.23741		47.066	-0.0164								45.322	0.04778
									45.436	1.35502		47.278	-0.01727								45.534	0.04707
									45.647	0.77806		47.49	-0.01763								45.747	0.04706
									45.871	0.24879		47.654	-0.01797								45.972	0.04678
									46.029	0.0992		47.864	-0.01902								46.203	0.04631
									46.245	-0.06965		48.077	-0.02								46.435	0.04599
									46.458	-0.15637		48.297	-0.02015								46.606	0.04602
									46.691	-0.18232		48.456	-0.02109								46.813	0.0459
									46.919	-0.19722		48.672	-0.02202								46.972	0.04468
									47.083	-0.20551		48.889	-0.02293								47.185	0.6279
									47.29	-0.21409		49.125	-0.02416								47.408	1.92613
									47.509	-0.22366		49.35	-0.02509								47.618	0.30205
									47.673	-0.23021		49.581	-0.02545								47.78	0.12794
									47.884	-0.23858		49.749	-0.02569								47.99	0.07174
									48.099	-0.24739		49.959	-0.02692								48.156	0.04984
									48.258	-0.25783		50.119	-0.02686								48.367	0.0394
									48.47	-0.27751		50.33	-0.0273								48.559	0.03135
												50.54	-0.02858								48.737	0.02997
												50.759	-0.02908								48.949	0.02628
												50.919	-0.02944								49.161	0.02574
												51.079	-0.03066								49.382	0.02142
												51.292	-0.0311								49.612	0.0227
												51.502	-0.03178								49.771	0.02194
												51.716	-0.03309								49.983	0.02178
												51.939	-0.03383								50.143	0.01972
												52.098	-0.03476								50.356	0.01712
												52.309	-0.036								50.522	0.01656
												52.47	-0.03655								50.734	0.01529
												52.681	-0.03734								50.955	0.0167
												52.895	-0.03915								51.167	0.01633
												53.119	0.0342								51.382	0.01553
												53.351	1.33519								51.556	0.01273
												53.58	2.23436								51.772	0.00692
												53.74	2.52869								51.934	0.00676
												53.899	2.51921								52.145	0.01066
												54.11	2.52151								52.36	0.00308
												54.322	2.52719								52.56	0.0091
												54.532	2.52308								52.718	1.91359
												54.759	2.51973								52.929	0.53903
												54.99	2.51877								53.122	0.1748
												55.223	2.52003								53.308	0.072
												55.452	2.5209								53.518	0.03963
												55.683	2.52064								53.739	0.02339
												55.913	2.51512								53.97	0.01715
												56.144	2.50994								54.2	0.01416
												56.304	2.50557								54.36	0.0133
												56.464	2.5008								54.557	0.01134
												56.675	2.49678								54.74	0.00952
												56.886	2.49156								54.95	0.00861
												57.046	2.48484								55.145	0.00982
												57.265	2.48101								55.325	0.00931
												57.479	2.47407								55.537	0.00866
												57.692	2.47242								55.755	0.00821
												57.859	2.47135								55.925	0.0081
												58.062	2.46968								56.135	0.0077
												58.233	2.46789								56.347	0.00724
												58.444	2.46604								56.515	0.00711
												58.656	2.46459								56.73	0.00695
												58.815	2.46217								56.942	0.00665
												59.033	2.46413								57.154	0.00626
												59.243	2.4658								57.385	0.00652
												59.408	2.46665								57.616	0.00675
												59.623	2.46728								57.845	0.00634
												59.83	2.46733								58.069	0.00626
												59.989	2.46676								58.229	0.00579
												60.244	2.46506								58.429	0.00558
												60.445	2.4605								58.592	0.00585
												60.655	2.45789								58.8	0.00579
												60.819	2.45506								59.019	0.00548
												61.033	2.45123								59.178	0.00532
												61.244	2.4486								59.388	0.00535
												61.455	2.44755								59.546	0.00522
												61.615	2.44662								59.758	0.00497
												61.827	2.44608								59.921	0.00483
												62.041	2.44527								60.14	0.00462
												62.274	2.44436								60.368	0.00437
												62.503	2.44375								60.57	0.0042
												62.734	2.44253								60.788	0.69321
												62.902	2.44222								61.019	1.76373
												63.121	2.44175								61.18	1.76763
												63.281	2.44105								61.391	1.78148
												63.493	2.43968								61.612	1.77838
												63.724	2.43844								61.845	1.77329
												63.933	2.43805								62.005	1.77315
												64.1	2.43733								62.164	1.77237
												64.311	2.43731								62.378	1.77393
												64.523	2.436								62.591	1.77417
												64.682	2.43544								62.75	1.77245
												64.894	2.43446								62.971	1.76984
												65.106	2.42761								63.184	1.77023
												65.322	2.41501								63.403	1.77031
												65.481	2.39169								63.612	1.76781
												65.693	2.34404								63.838	1.76754
												65.911	2.24028								64.096	1.76601
												66.142	1.40664								64.302	1.76529
												66.373	1.01215								64.53	1.76613
												66.605	0.86987								64.688	1.76734
												66.837	0.77982								64.903	1.76681
												66.996	-0.07509								65.125	1.76736
												67.207	-0.07939								65.284	1.76783
												67.426	-0.08346								65.446	1.76543
												67.657	-0.08861								65.659	1.76518
												67.893	-0.09523								65.867	1.76601
												68.121	-0.08564								66.032	1.76672
												68.35	-0.08306								66.243	1.76609
												68.509	-0.0802								66.457	1.76486
												68.668	-0.08368								66.619	1.76557
												68.882	-0.09234								66.832	1.7667
												69.093	-0.08371								67.045	1.76717
												69.258	-0.08899								67.203	1.76691
												69.463	-0.09295								67.416	1.76791
												69.707	-0.08711								67.578	1.76504
												69.914	-0.08004								67.789	1.75856
												70.129	-0.08332								68.001	1.74723
												70.349	-0.0819								68.214	1.13469
												70.512	-0.08076								68.429	0.25106
												70.708	-0.08621								68.661	0.12366
												70.872	-0.08179								68.892	0.08921
												71.083	-0.08097								69.055	0.07163
												71.243	-0.08066								69.251	0.05806
												71.457	-0.08313								69.483	0.05447
																					69.714	0.05102
																					69.945	0.04727
																					70.104	0.04507
																					70.316	0.04332
																					70.48	0.04106
																					70.693	0.03827
																					70.906	0.03615
																					71.123	0.0346
																					71.283	0.03486
																					71.494	0.03329
																					71.714	0.03255
																					71.873	0.03202
																					72.071	0.03128
																					72.231	0.03056
																					72.392	0.0303
																					72.603	0.02988
																					72.819	0.02925
																					72.978	0.02884
																					73.188	0.02843
																					73.348	0.02786
																					73.559	0.02736
																					73.77	0.02704
																					73.982	0.02635
																					74.159	0.0258
																					74.371	0.02665
																					74.585	0.02564
																					74.796	0.02491
																					74.954	0.90738
																					75.117	1.54831
																					75.328	0.33668
																					75.538	0.13235
																					75.749	0.0791
																					75.907	0.05462
																					76.12	0.03606
																					76.28	0.02803
																					76.491	0.0199
																					76.684	0.01395
																					76.875	0.01812
																					77.085	0.01781
																					77.275	0.01699
																					77.466	0.0114
																					77.678	0.01478
																					77.894	0.01572
																					78.093	0.01626
																					78.277	0.01641
																					78.49	0.01656
																					78.703	0.01659
																					78.917	0.01652
																					79.149	0.0165
																					79.317	0.01651
																					79.526	0.01586
																					79.686	0.0149
																					79.901	0.01426
																					80.111	0.01566
																					80.328	0.01446

## Sheet: Fig. 6a and b
	0 days		15 days			0 days		15 days
Strain(%)	Stress(kPa)	Strain(%)	Stress(kPa)		Stress(kPa)	∆C/C0	Stress(kPa)	∆C/C0
0	0	0	0		0	0	0	0
0.09558	0.04195	0.32386	0.02097		0.04195	0.08023	0.02097	0.0255
0.29679	0.04328	0.60724	0.01997		0.04328	0.08358	0.01997	0.02439
0.40746	0.05129	0.91553	0.01664		0.05129	0.08807	0.01664	0.04284
0.55837	0.05396	1.20825	0.0153		0.05396	0.0919	0.0153	0.06267
0.68665	0.04695	1.53834	0.0306		0.04695	0.09638	0.0306	0.07085
0.81492	0.04762	1.83105	0.0306		0.04762	0.10033	0.0306	0.08136
0.96583	0.04762	2.12066	0.0296		0.04762	0.10248	0.0296	0.11125
1.09411	0.04929	2.43829	0.02431		0.04929	0.10483	0.02431	0.12366
1.22238	0.04896	2.73101	0.02698		0.04896	0.10844	0.02698	0.14235
1.35065	0.04962	3.04864	0.03261		0.04962	0.11235	0.03261	0.16831
1.50157	0.05296	3.34136	0.03794		0.05296	0.11536	0.03794	0.18615
1.62984	0.04796	3.65588	0.03895		0.04796	0.11812	0.03895	0.20377
1.75811	0.05062	3.9486	0.04162		0.05062	0.12129	0.04162	0.22657
1.90903	0.0543	4.23821	0.04128		0.0543	0.12453	0.04128	0.23985
2.03478	0.05596	4.55584	0.03895		0.05596	0.12798	0.03895	0.2521
2.16306	0.06159	4.84856	0.03995		0.06159	0.13163	0.03995	0.26979
2.29133	0.05758	5.16308	0.04562		0.05758	0.13781	0.04562	0.2903
2.43973	0.06159	5.4558	0.04595		0.06159	0.14288	0.04595	0.29939
2.568	0.05992	5.74852	0.05163		0.05992	0.14897	0.05163	0.30676
2.69628	0.06092	6.06615	0.05758		0.06092	0.15463	0.05758	0.31753
2.84719	0.05792	6.35575	0.0736		0.05792	0.1602	0.0736	0.3296
2.97546	0.06359	6.67338	0.06392		0.06359	0.16881	0.06392	0.35021
3.10374	0.06326	6.96299	0.04962		0.06326	0.17653	0.04962	0.36389
3.23201	0.05825	7.28062	0.06126		0.05825	0.18458	0.06126	0.38256
3.38041	0.06359	7.57334	0.06092		0.06359	0.19343	0.06092	0.42359
3.50868	0.06493	7.86606	0.06593		0.06493	0.20316	0.06593	0.44531
3.63947	0.07093	8.18369	0.06826		0.07093	0.21063	0.06826	0.47525
3.78787	0.06426	8.4733	0.0696		0.06426	0.21771	0.0696	0.50744
3.91614	0.07327	8.79093	0.07127		0.07327	0.22755	0.07127	0.53641
4.04442	0.07127	9.08054	0.07227		0.07127	0.23327	0.07227	0.58574
4.17269	0.0746	9.37326	0.07794		0.0746	0.24132	0.07794	0.61372
4.3236	0.06993	9.68777	0.08857		0.06993	0.24998	0.08857	0.63338
4.44936	0.07127	9.98049	0.08957		0.07127	0.25748	0.08957	0.65737
4.57764	0.07761	10.2981	0.0879		0.07761	0.26478	0.0879	0.67343
4.72603	0.08228	10.5877	0.09391		0.08228	0.27177	0.09391	0.70455
4.85431	0.0766	10.9054	0.10325		0.0766	0.28303	0.10325	0.73892
4.9851	0.07927	11.2012	0.10058		0.07927	0.29114	0.10058	0.78611
5.11337	0.07927	11.4877	0.10292		0.07927	0.29884	0.10292	0.85716
5.26177	0.08361	11.8053	0.1146		0.08361	0.30484	0.1146	0.88469
5.39004	0.0869	12.098	0.12456		0.0869	0.31494	0.12456	0.93471
5.5158	0.08161	12.4157	0.12856		0.08161	0.32088	0.12856	0.9554
5.66671	0.08528	12.7053	0.13924		0.08528	0.32882	0.13924	0.98853
5.79247	0.08361	12.998	0.14887		0.08361	0.33528	0.14887	1.02043
5.92326	0.08495	13.3156	0.15555		0.08495	0.34157	0.15555	1.06102
6.05154	0.09124	13.6052	0.16355		0.09124	0.35103	0.16355	1.08333
6.20245	0.09224	13.9229	0.17952		0.09224	0.36046	0.17952	1.11219
6.33324	0.09591	14.2156	0.18887		0.09591	0.36855	0.18887	1.17123
6.45899	0.09725	14.5332	0.1912		0.09725	0.37735	0.1912	1.2329
6.60739	0.09791	14.8197	0.20217		0.09791	0.38688	0.20217	1.32788
6.73567	0.10325	15.1124	0.21218		0.10325	0.3973	0.21218	1.3909
6.86394	0.10425	15.4301	0.22552		0.10425	0.407	0.22552	1.45096
6.99221	0.10192	15.7228	0.23716		0.10192	0.41728	0.23716	1.52622
7.14313	0.10659	16.0404	0.2475		0.10659	0.42474	0.2475	1.60776
7.26888	0.10025	16.3331	0.26147		0.10025	0.43213	0.26147	1.67102
7.39967	0.10258	16.6227	0.27515		0.10258	0.44355	0.27515	1.75
7.54555	0.10258	16.9404	0.28249		0.10258	0.45649	0.28249	1.82353
7.67634	0.10425	17.23	0.29946		0.10425	0.46768	0.29946	1.91729
7.80462	0.11159	17.5476	0.31877		0.11159	0.47944	0.31877	2.00627
7.93289	0.10892	17.8372	0.33211		0.10892	0.48938	0.33211	2.10311
8.0838	0.11059	18.1548	0.34842		0.11059	0.5007	0.34842	2.18416
8.21208	0.11555	18.4476	0.3661		0.11555	0.51008	0.3661	2.23813
8.34035	0.11855	18.7403	0.38574		0.11855	0.52529	0.38574	2.3193
8.48875	0.11426	19.0548	0.40009		0.11426	0.5377	0.40009	2.42151
8.61702	0.12523	19.3475	0.4224		0.12523	0.55505	0.4224	2.54195
8.7453	0.12022	19.6652	0.44337		0.12022	0.57085	0.44337	2.6757
8.87357	0.12589	19.9517	0.46502		0.12589	0.58922	0.46502	2.77433
9.02197	0.12256	20.2444	0.48966		0.12256	0.60571	0.48966	2.8802
9.15024	0.12389	20.5651	0.52265		0.12389	0.62091	0.52265	2.99325
9.276	0.13324	20.8547	0.55196		0.13324	0.63633	0.55196	3.1282
9.42691	0.13657	21.1724	0.57961		0.13657	0.6525	0.57961	3.26601
9.55519	0.1349	21.4651	0.61527		0.1349	0.66728	0.61527	3.44993
9.68598	0.13324	21.7827	0.65259		0.13324	0.68961	0.65259	3.62118
9.81425	0.13724	22.0692	0.69354		0.13724	0.70964	0.69354	3.8213
9.96516	0.1482	22.3619	0.72786		0.1482	0.72241	0.72786	3.96032
10.0934	0.15755	22.6795	0.77949		0.15755	0.73895	0.77949	4.15012
10.2217	0.14754	22.9723	0.81615		0.14754	0.75501	0.81615	4.33139
10.3701	0.15821	23.2868	0.85881		0.15821	0.77009	0.85881	4.5614
10.4984	0.14024	23.5826	0.90844		0.14024	0.78727	0.90844	4.78185
10.6267	0.15855	23.8722	0.9614		0.15855	0.80734	0.9614	4.99978
10.7575	0.15655	24.1898	1.02437		0.15655	0.8258	1.02437	5.23141
10.9033	0.16756	24.4795	1.08434		0.16756	0.84629	1.08434	5.47556
11.0316	0.16055	24.7971	1.1566		0.16055	0.86773	1.1566	5.75265
11.1624	0.16355	25.0867	1.22224		0.16355	0.89506	1.22224	6.0178
11.3083	0.17385	25.4043	1.29885		0.17385	0.92226	1.29885	6.26373
11.4391	0.17519	25.6971	1.37784		0.17519	0.95002	1.37784	6.53037
11.5673	0.17852	25.9867	1.46045		0.17852	0.97052	1.46045	6.81274
11.6931	0.18453	26.3043	1.5514		0.18453	0.99083	1.5514	7.12259
11.844	0.18453	26.597	1.64398		0.18453	1.01321	1.64398	7.43375
11.9723	0.18353	26.9146	1.7559		0.18353	1.03397	1.7559	7.64912
12.1006	0.1872	27.2042	1.86121		0.1872	1.05886	1.86121	7.8969
12.2515	0.18853	27.4938	1.97614		0.18853	1.08429	1.97614	8.17954
12.3772	0.1932	27.8146	2.1027		0.1932	1.10857	2.1027	8.38283
12.508	0.19721	28.1042	2.21863		0.19721	1.12795	2.21863	8.66857
12.6363	0.19788	28.4218	2.36655		0.19788	1.1519	2.36655	8.97537
12.7822	0.21385	28.7145	2.52648		0.21385	1.17777	2.52648	9.29714
12.913	0.21184	29.0322	2.68536		0.21184	1.20751	2.68536	9.62198
13.0387	0.21351	29.3218	2.85325		0.21351	1.23827	2.85325	9.95603
13.1921	0.22386	29.6145	3.02281		0.22386	1.27059	3.02281	10.3008
13.3179	0.22552	29.9321	3.21974		0.22552	1.29965	3.21974	10.6665
13.4462	0.23248	30.2217	3.4036		0.23248	1.33544	3.4036	11.0061
13.5745	0.23148	30.5363	3.61082		0.23148	1.36724	3.61082	11.3366
13.7228	0.23782	30.8321	3.81703		0.23782	1.39353	3.81703	11.6903
13.8536	0.2445	31.1217	4.03322		0.2445	1.42811	4.03322	12.0535
13.9794	0.24883	31.4362	4.27376		0.24883	1.46377	4.27376	12.4177
14.1278	0.25384	31.7289	4.50796		0.25384	1.50152	4.50796	12.7668
14.2586	0.26681	32.0497	4.77977		0.26681	1.52987	4.77977	13.0887
14.3843	0.2618	32.3362	5.03165		0.2618	1.56547	5.03165	13.3489
14.5151	0.26814	32.6507	5.32215		0.26814	1.60677	5.32215	13.7047
14.6635	0.26881	32.9465	5.61031		0.26881	1.64553	5.61031	14.0609
14.7943	0.27882	33.2392	5.90977		0.27882	1.68428	5.90977	14.4108
14.9201	0.28182	33.5569	6.25156		0.28182	1.72169	6.25156	14.8044
15.0685	0.29279	33.8465	6.57605		0.29279	1.76154	6.57605	15.0936
15.1993	0.29445	34.1672	6.94415		0.29445	1.80699	6.94415	15.4464
15.3275	0.30046	34.4568	7.29528		0.30046	1.86247	7.29528	15.8195
15.4533	0.30713	34.7464	7.65643		0.30713	1.90816	7.65643	16.2053
15.6042	0.3171	35.0641	8.07349		0.3171	1.95615	8.07349	16.5488
15.7325	0.32477	35.3537	8.46757		0.32477	2.00441	8.46757	16.9571
15.8608	0.33445	35.6713	8.90632		0.33445	2.03368	8.90632	17.3942
16.0117	0.34575	35.9609	9.33406		0.34575	2.07526	9.33406	17.7869
16.1374	0.35042	36.2817	9.81046		0.35042	2.11972	9.81046	18.2785
16.2657	0.35576	36.5713	10.2488		0.35576	2.172	10.2488	18.7305
16.3965	0.36944	36.8609	10.7026		0.36944	2.21574	10.7026	19.1426
16.5449	0.37411	37.1785	11.2159		0.37411	2.25642	11.2159	19.5981
16.6757	0.3804	37.4712	11.6933		0.3804	2.30492	11.6933	20.0278
16.8014	0.38774	37.7889	12.2247		0.38774	2.35979	12.2247	20.4637
16.9498	0.39709	38.0754	12.7264		0.39709	2.41293	12.7264	20.8815
17.0781	0.40438	38.3712	13.2437		0.40438	2.46447	13.2437	21.3177
17.2064	0.41839	38.6857	13.8044		0.41839	2.51193	13.8044	21.7603
17.3372	0.42073	38.9784	14.3361		0.42073	2.56153	14.3361	22.255
17.4856	0.43236	39.2992	14.9291		0.43236	2.60092	14.9291	22.724
17.6138	0.43937	39.5857	15.4654		0.43937	2.64673	15.4654	23.1574
17.7421	0.44938	39.9033	16.07		0.44938	2.69003	16.07	23.5854
17.888	0.45505				0.45505	2.73489
18.0188	0.47169				0.47169	2.7785
18.1471	0.48437				0.48437	2.83066
18.2753	0.48771				0.48771	2.8748
18.4237	0.50601				0.50601	2.92864
18.552	0.50801				0.50801	2.98492
18.6828	0.53166				0.53166	3.03772
18.8312	0.53666				0.53666	3.10472
18.9595	0.55931				0.55931	3.16621
19.0877	0.55864				0.55864	3.2283
19.216	0.57332				0.57332	3.29786
19.3644	0.58161				0.58161	3.36059
19.4927	0.59296				0.59296	3.42349
19.6184	0.61694				0.61694	3.49313
19.7719	0.62027				0.62027	3.55486
19.9001	0.63758				0.63758	3.62462
20.0284	0.64692				0.64692	3.69502
20.1567	0.65927				0.65927	3.77067
20.3076	0.68124				0.68124	3.85774
20.4359	0.69588				0.69588	3.92501
20.5616	0.70923				0.70923	3.9993
20.7151	0.72953				0.72953	4.05289
20.8458	0.74655				0.74655	4.11844
20.9691	0.75885				0.75885	4.17356
21.0999	0.77849				0.77849	4.22724
21.2458	0.79417				0.79417	4.28549
21.374	0.81481				0.81481	4.35864
21.5023	0.8325				0.8325	4.41988
21.6507	0.85314				0.85314	4.49719
21.7815	0.87478				0.87478	4.58089
21.9073	0.8918				0.8918	4.65612
22.0355	0.91678				0.91678	4.73615
22.1865	0.93475				0.93475	4.82755
22.3147	0.96206				0.96206	4.91313
22.443	0.97903				0.97903	4.99909
22.5914	0.99739				0.99739	5.07749
22.7197	1.02604				1.02604	5.16207
22.8505	1.05001				1.05001	5.25359
22.9762	1.07232				1.07232	5.313
23.1271	1.09301				1.09301	5.38939
23.2554	1.12662				1.12662	5.4682
23.3837	1.15031				1.15031	5.55435
23.5346	1.17295				1.17295	5.63083
23.6604	1.20527				1.20527	5.71839
23.7886	1.21157				1.21157	5.81122
23.9169	1.25557				1.25557	5.90533
24.0678	1.28054				1.28054	5.99629
24.1986	1.32321				1.32321	6.08201
24.3244	1.35948				1.35948	6.17152
24.4728	1.3848				1.3848	6.24899
24.6035	1.43313				1.43313	6.33584
24.7268	1.45745				1.45745	6.41943
24.8576	1.49277				1.49277	6.50826
25.006	1.54006				1.54006	6.60559
25.1342	1.57037				1.57037	6.66738
25.265	1.618				1.618	6.75503
25.4134	1.66133				1.66133	6.85127
25.5417	1.69498				1.69498	6.95134
25.67	1.7366				1.7366	7.05059
25.7982	1.77859				1.77859	7.16517
25.9467	1.82455				1.82455	7.2673
26.0724	1.87317				1.87317	7.37473
26.2032	1.9165				1.9165	7.45137
26.3541	1.97013				1.97013	7.55712
26.4799	2.01608				2.01608	7.66831
26.6107	2.06342				2.06342	7.78074
26.7389	2.11438				2.11438	7.89514
26.8873	2.17101				2.17101	8.00539
27.0181	2.22097				2.22097	8.11452
27.1439	2.26864				2.26864	8.23166
27.2948	2.33027				2.33027	8.35795
27.4205	2.38123				2.38123	8.47753
27.5513	2.43953				2.43953	8.59724
27.6796	2.49416				2.49416	8.72179
27.828	2.56047				2.56047	8.81298
27.9563	2.61576				2.61576	8.93288
28.082	2.67473				2.67473	9.05607
28.2355	2.75067				2.75067	9.17886
28.3637	2.81264				2.81264	9.31031
28.492	2.88057				2.88057	9.43531
28.6203	2.94354				2.94354	9.56755
28.7687	3.02086				3.02086	9.69429
28.897	3.09046				3.09046	9.82714
29.0278	3.16344				3.16344	9.95878
29.1736	3.24004				3.24004	10.0918
29.3044	3.32065				3.32065	10.2191
29.4327	3.38763				3.38763	10.3586
29.5585	3.4619				3.4619	10.455
29.7068	3.55519				3.55519	10.5818
29.8351	3.63046				3.63046	10.709
29.9634	3.71474				3.71474	10.8495
30.1143	3.8117				3.8117	10.9841
30.2451	3.89598				3.89598	11.0875
30.3709	3.98092				3.98092	11.2152
30.5017	4.07188				4.07188	11.373
30.65	4.17251				4.17251	11.5578
30.7783	4.27075				4.27075	11.7454
30.9066	4.35737				4.35737	11.9206
31.0575	4.47764				4.47764	12.0378
31.1833	4.56592				4.56592	12.1824
31.3141	4.6645				4.6645	12.3359
31.4398	4.76947				4.76947	12.4914
31.5882	4.88373				4.88373	12.6437
31.7165	4.99232				4.99232	12.7937
31.8473	5.09429				5.09429	12.9369
31.9931	5.22018				5.22018	13.1142
32.1239	5.33111				5.33111	13.2849
32.2497	5.4417				5.4417	13.4135
32.378	5.56431				5.56431	13.5832
32.5289	5.69559				5.69559	13.7545
32.6572	5.80685				5.80685	13.9518
32.788	5.93375				5.93375	14.1308
32.9338	6.0727				6.0727	14.3238
33.0646	6.1956				6.1956	14.4729
33.1929	6.32521				6.32521	14.6169
33.3186	6.44648				6.44648	14.7978
33.4721	6.60303				6.60303	15.0063
33.5978	6.72964				6.72964	15.1896
33.7286	6.86154				6.86154	15.3249
33.8745	7.02047				7.02047	15.4984
34.0028	7.15637				7.15637	15.6772
34.1311	7.29895				7.29895	15.8702
34.2593	7.43686				7.43686	16.0705
34.4102	7.60675				7.60675	16.2779
34.5385	7.75234				7.75234	16.467
34.6668	7.89792				7.89792	16.6623
34.8152	8.07382				8.07382	16.8812
34.9435	8.22674				8.22674	17.0916
35.0717	8.37728				8.37728	17.3011
35.2025	8.53922				8.53922	17.5034
35.3509	8.71945				8.71945	17.686
35.4792	8.88201				8.88201	17.8585
35.6075	9.04456				9.04456	18.0621
35.7559	9.23314				9.23314	18.2347
35.8867	9.40404				9.40404	18.399
36.0124	9.56826				9.56826	18.5982
36.1407	9.74282				9.74282	18.7918
36.2891	9.94337				9.94337	18.9936
36.4174	10.1189				10.1189	19.2155
36.5481	10.3028				10.3028	19.4074
36.6966	10.5144				10.5144	19.6044
36.8248	10.6959				10.6959	19.8084
36.9556	10.8881				10.8881	19.9479
37.0814	11.0744				11.0744	20.1389
37.2323	11.2986				11.2986	20.3316
37.358	11.4931				11.4931	20.5355
37.4863	11.6853				11.6853	20.7353
37.6372	11.9188				11.9188	20.8823
37.7655	12.1144				12.1144	21.0456
37.8963	12.3226				12.3226	21.245
38.0221	12.5278				12.5278	21.4237
38.1705	12.766				12.766	21.5862
38.2987	12.9769				12.9769	21.7321
38.4245	13.1847				13.1847	21.9192
38.5779	13.4393				13.4393	22.0655
38.7062	13.6575				13.6575	22.2425
38.8345	13.878				13.878	22.4247
38.9652	14.0986				14.0986	22.619
39.1111	14.3554				14.3554	22.7535
39.2394	14.5806				14.5806	22.9313
39.3677	14.8125				14.8125	23.1098
39.5161	15.076				15.076	23.3162
39.6469	15.3105				15.3105	23.4614
39.7726	15.5453				15.5453	23.6442
39.921	15.8235				15.8235	23.7785

## Sheet: Fig. 6c, d and e
Time(s)	∆C/C0		Time(s)	∆C/C0		Time(s)	∆C/C0		Time(s)	∆C/C0			∆C/C0
0	0		0	0.60966		0	0		0	2.47607		temperature	a	b	c	Mean	Standard Deviation
0.204	-1.4008e-05		0.202	0.60967		0.173	4.3562e-06		0.2	2.47607		-5	0	0	0	0	0
0.433	-1.4008e-05		0.396	0.60965		0.383	-4.3562e-06		0.41	2.47607		5	0.26023	0.22998	0.28998	0.26006	0.03
0.663	-2.10119e-05		0.588	0.60966		0.542	0		0.581	2.47607		15	0.59992	0.53	0.64002	0.58998	0.05568
0.895	-4.20239e-05		0.802	0.60965		0.753	-4.3562e-06		0.786	2.47607		25	1.02431	0.90999	1.06999	1.00143	0.08242
1.054	-3.50199e-05		1.014	0.60965		0.914	-4.3562e-06		0.95	2.47606		35	1.53608	1.37001	1.57997	1.49535	0.11075
1.214	-7.00398e-05		1.227	0.60964		1.124	-4.3562e-06		1.162	2.47605		45	2.12675	1.94998	2.18002	2.08558	0.12042
1.424	-7.00398e-05		1.449	0.60963		1.337	0		1.374	2.47605		55	2.82827	2.62999	2.88003	2.77943	0.13198
1.636	-9.80557e-05		1.68	0.60965		1.548	-8.7124e-06		1.532	2.47605		65	3.65121	3.44	3.69	3.59373	0.13455
1.86	-9.10517e-05		1.911	0.60965		1.772	-8.7124e-06		1.752	2.47605		75	4.59011	4.41997	4.65003	4.55337	0.11935
2.073	-9.80557e-05		2.142	0.60962		1.932	8.7124e-06		1.956	2.47606
2.234	-0.00010506		2.373	0.60962		2.092	-4.3562e-06		2.116	2.47606
2.446	-0.000119068		2.606	0.60961		2.306	-1.30686e-05		2.332	2.47605
2.665	-9.10517e-05		2.838	0.6096		2.518	-4.3562e-06		2.491	2.47606
2.896	-9.10517e-05		3.071	0.60958		2.731	0		2.721	2.47605
3.128	-9.80557e-05		3.297	0.60958		2.89	0		2.938	2.47604
3.361	-8.40477e-05		3.528	0.6096		3.102	4.3562e-06		3.15	2.47604
3.589	-0.000126072		3.759	0.60957		3.262	4.3562e-06		3.365	2.47603
3.82	-0.000133076		3.99	0.60958		3.473	4.3562e-06		3.582	2.47603
4.053	-0.00014008		4.155	0.60957		3.685	4.3562e-06		3.741	2.47603
4.282	-0.00014008		4.365	0.60959		3.899	4.3562e-06		3.955	2.47602
4.513	-0.000147084		4.58	0.60957		4.13	8.7124e-06		4.165	2.47602
4.743	-0.000168095		4.811	0.60957		4.362	4.3562e-06		4.395	2.47601
4.981	-0.000203115		5.042	0.60957		4.592	4.3562e-06		4.625	2.476
5.205	-0.000224127		5.273	0.60956		4.823	8.7124e-06		4.856	2.476
5.436	-0.000259147		5.505	0.60953		5.054	2.1781e-05		5.087	2.47601
5.598	-0.000238135		5.735	0.60954		5.214	1.30686e-05		5.246	2.47601
5.81	-0.000238135		5.968	0.60955		5.425	1.30686e-05		5.457	2.47601
6.028	-0.000252143		6.197	0.60953		5.586	4.3562e-06		5.677	2.47601
6.26	-0.000231131		6.428	0.60953		5.799	0		5.908	2.47601
6.488	-0.000231131		6.659	0.60953		6.011	0		6.139	2.47601
6.719	-0.000231131		6.819	0.60953		6.233	8.7124e-06		6.37	2.47601
6.95	-0.000231131		7.03	0.60951		6.464	4.3562e-06		6.605	2.476
7.181	-0.000231131		7.192	0.6095		6.623	1.30686e-05		6.832	2.476
7.413	-0.000231131		7.404	0.60949		6.837	1.30686e-05		7.064	2.476
7.646	-0.000238135		7.615	0.60949		7.054	1.30686e-05		7.294	2.476
7.877	-0.000245139		7.778	0.60949		7.285	1.30686e-05		7.454	2.47601
8.105	-0.000252143		7.99	0.60949		7.517	1.74248e-05		7.667	2.47601
8.337	-0.000231131		8.202	0.60948		7.748	1.74248e-05		7.885	2.47601
8.567	-0.000224127		8.429	0.60948		7.979	1.30686e-05		8.115	2.476
8.798	-0.000224127		8.66	0.60949		8.21	1.30686e-05		8.349	2.476
8.957	-0.000238135		8.893	0.60953		8.441	8.7124e-06		8.527	2.47599
9.168	-0.000245139		9.121	0.60951		8.672	4.3562e-06		8.739	2.47599
9.388	-0.000259147		9.354	0.60952		8.903	4.3562e-06		8.951	2.47599
9.619	-0.000273155		9.583	0.60952		9.134	0		9.167	2.47598
9.851	-0.000259147		9.814	0.6095		9.365	-8.7124e-06		9.397	2.47597
10.082	-0.000252143		10.045	0.60948		9.524	0		9.627	2.47597
10.313	-0.000252143		10.275	0.60948		9.736	-8.7124e-06		9.859	2.47596
10.544	-0.000238135		10.507	0.60948		9.955	-1.30686e-05		10.089	2.47598
10.773	-0.000238135		10.739	0.60945		10.186	-4.3562e-06		10.32	2.47597
10.934	-0.000245139		10.9	0.60943		10.416	-4.3562e-06		10.479	2.47597
11.146	-0.000259147		11.113	0.60943		10.647	0		10.638	2.47597
11.363	-0.000273155		11.328	0.60941		10.88	-4.3562e-06		10.85	2.47597
11.522	-0.000287163		11.559	0.60941		11.109	-8.7124e-06		11.062	2.47597
11.681	-0.000273155		11.79	0.6094		11.271	-4.3562e-06		11.222	2.47597
11.896	-0.000280159		12.022	0.6094		11.431	1.30686e-05		11.433	2.47597
12.106	-0.000280159		12.253	0.60939		11.642	1.30686e-05		11.646	2.47597
12.313	-0.000301171		12.483	0.6094		11.854	-1.30686e-05		11.858	2.47598
12.544	-0.000308175		12.714	0.6094		12.12	-1.30686e-05		12.018	2.47599
12.783	-0.000315179		12.945	0.60939		12.331	-4.3562e-06		12.23	2.47598
13.005	-0.000308175		13.176	0.60939		12.545	-1.74248e-05		12.448	2.47597
13.236	-0.000287163		13.407	0.60939		12.753	-2.61372e-05		12.68	2.47598
13.467	-0.000133076		13.64	0.60938		12.981	-2.1781e-05		12.839	2.47599
13.698	-0.000287163		13.869	0.60939		13.212	-2.61372e-05		12.998	2.47599
13.93	-0.000259147		14.031	0.60938		13.445	-2.61372e-05		13.21	2.47598
14.163	-0.000280159		14.244	0.60938		13.673	-1.30686e-05		13.421	2.47597
14.395	-0.000308175		14.459	0.60937		13.904	-8.7124e-06		13.632	2.47597
14.623	-0.000308175		14.69	0.60936		14.135	0		13.862	2.47597
14.783	-0.000301171		14.921	0.60938		14.365	-4.3562e-06		14.09	2.47598
14.995	-0.000329187		15.155	0.6094		14.524	4.3562e-06		14.321	2.47597
15.214	-0.000336191		15.383	0.6094		14.736	4.3562e-06		14.552	2.47597
15.373	-0.000322183		15.614	0.60938		14.958	4.3562e-06		14.785	2.47597
15.533	-0.000336191		15.845	0.60935		15.186	8.7124e-06		15.014	2.47597
15.746	-0.000329187		16.076	0.60934		15.346	8.7124e-06		15.252	2.47597
15.955	-0.000350199		16.306	0.60934		15.505	1.30686e-05		15.476	2.47597
16.166	-0.000357203		16.539	0.60934		15.716	1.30686e-05		15.707	2.47598
16.327	-0.000364207		16.77	0.60934		15.928	1.30686e-05		15.938	2.47598
16.538	-0.000371211		17	0.60933		16.138	1.74248e-05		16.1	2.47598
16.696	-0.000371211		17.231	0.60934		16.298	2.1781e-05		16.311	2.476
16.907	-0.000322183		17.462	0.60934		16.509	1.74248e-05		16.528	2.476
17.118	-0.000336191		17.693	0.60934		16.725	4.3562e-06		16.759	2.476
17.344	-0.000329187		17.924	0.60934		16.956	0		16.99	2.476
17.572	-0.000329187		18.155	0.60935		17.189	4.3562e-06		17.221	2.47599
17.741	-0.000301171		18.388	0.60934		17.419	-8.7124e-06		17.452	2.476
17.952	-0.000301171		18.616	0.60934		17.649	0		17.682	2.47601
18.163	-0.000322183		18.778	0.60935		17.812	4.3562e-06		17.914	2.47602
18.394	-0.000315179		18.99	0.60936		18.02	1.30686e-05		18.147	2.47602
18.623	-0.000301171		19.206	0.60935		18.239	4.3562e-06		18.376	2.47602
18.854	-0.000308175		19.438	0.60936		18.47	4.3562e-06		18.607	2.47603
19.086	-0.000301171		19.67	0.60937		18.701	8.7124e-06		18.838	2.47601
19.316	-0.000308175		19.899	0.60938		18.862	8.7124e-06		19.069	2.47603
19.547	-0.000378215		20.061	0.60937		19.072	0		19.3	2.47603
19.78	-0.000392223		20.273	0.60937		19.296	-4.3562e-06		19.531	2.47601
20.01	-0.000364207		20.489	0.60938		19.522	0		19.762	2.47601
20.24	-0.000406231		20.721	0.60936		19.753	-4.3562e-06		19.995	2.47601
20.471	-0.000413235		20.953	0.60936		19.984	-4.3562e-06		20.224	2.47601
20.702	-0.000413235		21.183	0.60936		20.216	-8.7124e-06		20.455	2.47601
20.933	-0.000406231		21.413	0.60939		20.446	-4.3562e-06		20.686	2.47601
21.163	-0.000399227		21.605	0.60939		20.605	-4.3562e-06		20.917	2.47601
21.396	-0.000399227		21.817	0.60938		20.816	-4.3562e-06		21.08	2.47601
21.627	-0.000406231		22.029	0.60939		21.036	-4.3562e-06		21.294	2.476
21.857	-0.000399227		22.24	0.60938		21.267	-1.30686e-05		21.506	2.47601
22.088	-0.000392223		22.463	0.60939		21.499	-1.74248e-05		21.668	2.476
22.319	-0.000392223		22.694	0.60939		21.73	-1.74248e-05		21.879	2.47599
22.55	-0.000371211		22.925	0.60939		21.962	-1.74248e-05		22.096	2.47598
22.781	-0.000399227		23.156	0.60938		22.195	-1.74248e-05		22.328	2.47597
23.014	-0.000392223		23.388	0.60939		22.422	-1.74248e-05		22.558	2.47598
23.243	-0.000385219		23.621	0.60936		22.653	-1.30686e-05		22.719	2.47598
23.474	-0.000371211		23.849	0.60938		22.884	-2.1781e-05		22.929	2.47598
23.705	-0.000371211		24.012	0.60939		23.115	-1.74248e-05		23.148	2.47597
23.936	-0.000371211		24.225	0.60939		23.347	-1.74248e-05		23.379	2.47598
24.167	-0.000385219		24.444	0.60938		23.58	-1.30686e-05		23.61	2.47598
24.398	-0.000378215		24.673	0.60939		23.811	-1.74248e-05		23.843	2.47596
24.629	-0.000371211		24.904	0.60939		24.039	-1.30686e-05		24.072	2.47596
24.86	-0.000385219		25.133	0.60941		24.198	-1.74248e-05		24.303	2.47596
25.091	-0.000385219		25.364	0.60943		24.41	-1.30686e-05		24.535	2.47596
25.253	-0.000385219		25.595	0.60945		24.63	-1.30686e-05		24.765	2.47596
25.464	-0.000392223		25.826	0.60946		24.861	-1.30686e-05		24.997	2.47595
25.623	-0.000399227		26.057	0.60945		25.021	-1.30686e-05		25.229	2.47594
25.837	-0.000392223		26.291	0.60946		25.181	-2.1781e-05		25.463	2.47594
26.049	-0.000392223		26.522	0.60948		25.391	-1.74248e-05		25.689	2.47593
26.271	-0.000392223		26.75	0.6095		25.602	-1.74248e-05		25.921	2.47593
26.502	-0.000399227		26.913	0.6095		25.762	-3.04934e-05		26.153	2.47593
26.733	-0.000392223		27.124	0.60948		25.973	-1.74248e-05		26.382	2.47593
26.963	-0.000392223		27.34	0.60947		26.184	-2.1781e-05		26.613	2.47593
27.195	-0.000385219		27.573	0.60947		26.343	-2.61372e-05		26.846	2.47593
27.425	-0.000357203		27.803	0.60945		26.555	-2.1781e-05		27.008	2.4759
27.657	-0.000385219		28.033	0.60945		26.766	-2.1781e-05		27.219	2.47591
27.887	-0.000378215		28.264	0.60946		26.989	-2.1781e-05		27.434	2.4759
28.119	-0.000413235		28.495	0.60945		27.149	-4.79182e-05		27.594	2.47589
28.35	-0.000420239		28.726	0.6095		27.359	-3.92058e-05		27.804	2.47589
28.581	-0.000413235		28.957	0.60957		27.519	-2.61372e-05		28.024	2.47589
28.813	-0.000420239		29.189	0.6096		27.731	-3.04934e-05		28.255	2.47589
29.044	-0.000413235		29.419	0.60954		27.941	-2.61372e-05		28.487	2.47588
29.274	-0.000434247		29.65	0.60957		28.169	-5.22744e-05		28.717	2.47587
29.434	-0.000441251		29.881	0.60951		28.399	-6.96992e-05		28.948	2.47587
29.645	-0.000441251		30.112	0.60948		28.629	-7.84116e-05		29.179	2.47587
29.806	-0.000448255		30.343	0.60948		28.86	-3.04934e-05		29.338	2.47586
30.017	-0.000448255		30.574	0.60948		29.02	-6.96992e-05		29.55	2.47586
30.229	-0.000455259		30.805	0.60948		29.232	-3.92058e-05		29.769	2.47586
30.453	-0.000448255		31.035	0.60947		29.45	-4.3562e-05		30.001	2.47586
30.684	-0.000448255		31.266	0.60947		29.609	-7.40554e-05		30.231	2.47586
30.915	-0.000448255		31.497	0.60947		29.82	-6.96992e-05		30.465	2.47585
31.147	-0.000448255		31.729	0.60946		29.981	-8.27678e-05		30.694	2.47585
31.377	-0.000448255		31.959	0.60946		30.191	-3.04934e-05		30.925	2.47584
31.608	-0.000469267		32.19	0.60946		30.402	-3.92058e-05		31.16	2.47583
31.841	-0.000455259		32.423	0.60947		30.629	-3.48496e-05		31.387	2.47583
32.071	-0.000448255		32.654	0.60948		30.861	-8.27678e-05		31.618	2.47582
32.301	-0.000455259		32.883	0.60945		31.091	-4.3562e-05		31.849	2.47582
32.533	-0.000462263		33.114	0.60946		31.322	-7.40554e-05		32.08	2.47583
32.764	-0.000469267		33.279	0.60946		31.482	-3.48496e-05		32.311	2.47582
32.997	-0.000469267		33.49	0.60947		31.697	-5.22744e-05		32.542	2.47582
33.226	-0.000497282		33.705	0.60948		31.913	-4.3562e-05		32.773	2.47581
33.457	-0.000504286		33.937	0.60947		32.073	-6.96992e-05		33.005	2.47582
33.688	-0.000497282		34.166	0.60946		32.232	-6.09868e-05		33.234	2.47583
33.919	-0.00051129		34.397	0.60946		32.445	-3.92058e-05		33.394	2.47581
34.15	-0.00051129		34.628	0.60945		32.655	-3.48496e-05		33.604	2.47581
34.38	-0.000518294		34.859	0.60946		32.815	-3.48496e-05		33.824	2.47581
34.613	-0.000504286		35.094	0.60945		33.028	-2.61372e-05		34.055	2.47582
34.844	-0.000518294		35.324	0.60948		33.237	-2.61372e-05		34.286	2.47581
35.074	-0.000525298		35.554	0.60946		33.397	-5.66306e-05		34.517	2.4758
35.304	-0.000525298		35.715	0.60941		33.607	-6.5343e-05		34.748	2.4758
35.536	-0.000518294		35.929	0.6094		33.817	-4.3562e-05		34.907	2.4758
35.766	-0.000525298		36.144	0.60948		33.978	-3.92058e-05		35.124	2.4758
35.997	-0.000539306		36.374	0.60943		34.194	-2.1781e-05		35.338	2.47579
36.229	-0.00054631		36.606	0.60944		34.41	-4.3562e-06		35.569	2.4758
36.461	-0.000532302		36.836	0.60948		34.627	-4.3562e-06		35.73	2.4758
36.691	-0.000518294		36.996	0.60948		34.787	-2.61372e-05		35.939	2.47581
36.921	-0.000504286		37.207	0.6095		34.947	-4.3562e-05		36.159	2.47583
37.152	-0.000490278		37.425	0.60951		35.158	-3.48496e-05		36.322	2.47582
37.311	-0.000518294		37.656	0.60944		35.367	-3.92058e-05		36.482	2.47582
37.522	-0.000518294		37.887	0.60947		35.58	-4.3562e-05		36.695	2.47581
37.742	-0.000525298		38.121	0.60948		35.807	-3.92058e-05		36.904	2.47582
37.902	-0.000539306		38.349	0.60949		36.039	-2.1781e-05		37.117	2.47581
38.062	-0.000532302		38.58	0.60949		36.268	-2.61372e-05		37.338	2.47581
38.278	-0.000539306		38.811	0.60949		36.5	-3.04934e-05		37.569	2.47582
38.488	-0.00054631		39.042	0.60949		36.732	-3.04934e-05		37.8	2.4758
38.695	-0.000532302		39.274	0.60948		36.894	-3.92058e-05		38.031	2.47583
38.921	-0.00054631		39.506	0.60948		37.053	-3.48496e-05		38.262	2.47582
39.152	-0.000553314		39.737	0.60948		37.266	-3.04934e-05		38.494	2.47583
39.383	-0.000560318		39.966	0.6095		37.477	-3.92058e-05		38.652	2.47584
39.614	-0.000567322		40.197	0.6095		37.688	-3.92058e-05		38.863	2.47584
39.777	-0.000574326		40.428	0.60949		37.91	-4.3562e-05		39.022	2.47584
39.987	-0.000588334		40.659	0.60949		38.14	-3.48496e-05		39.234	2.47584
40.204	-0.000595338		40.89	0.60949		38.372	-2.61372e-05		39.394	2.47584
40.436	-0.000602342		41.123	0.60948		38.603	-1.30686e-05		39.604	2.47584
40.67	-0.00061635		41.353	0.6095		38.833	-8.7124e-06		39.816	2.47585
40.897	-0.000637362		41.583	0.60949		39.065	-1.74248e-05		39.975	2.47584
41.129	-0.000623354		41.814	0.60949		39.305	-1.74248e-05		40.19	2.47585
41.36	-0.000630358		42.045	0.60949		39.527	-2.61372e-05		40.401	2.47585
41.59	-0.000630358		42.277	0.60948		39.758	-2.61372e-05		40.621	2.47584
41.824	-0.000644366		42.508	0.60949		39.989	-2.1781e-05		40.852	2.47584
42.052	-0.000658374		42.74	0.60948		40.148	-3.04934e-05		41.083	2.47585
42.211	-0.00072141		42.971	0.60948		40.366	-3.92058e-05		41.314	2.47585
42.37	-0.000728414		43.201	0.60948		40.534	-5.22744e-05		41.546	2.47585
42.584	-0.00072141		43.362	0.60948		40.741	-3.48496e-05		41.777	2.47585
42.796	-0.000728414		43.573	0.60948		40.958	-1.74248e-05		42.007	2.47584
43.006	-0.00072141		43.791	0.60949		41.118	-3.04934e-05		42.238	2.47585
43.166	-0.000714406		44.022	0.6095		41.329	-3.04934e-05		42.469	2.47585
43.325	-0.000728414		44.255	0.60951		41.539	-5.66306e-05		42.7	2.47584
43.54	-0.000728414		44.484	0.60952		41.756	-6.96992e-05		42.931	2.47585
43.752	-0.00072141		44.645	0.60952		41.984	-5.66306e-05		43.09	2.47585
43.963	-0.000728414		44.861	0.60952		42.18	-4.79182e-05		43.25	2.47586
44.18	-0.000735418		45.074	0.60947		42.39	-3.92058e-05		43.462	2.47586
44.413	-0.000735418		45.307	0.60948		42.603	-4.79182e-05		43.672	2.47586
44.642	-0.000728414		45.538	0.60949		42.814	-4.3562e-05		43.883	2.47586
44.873	-0.000728414		45.767	0.60948		43.039	-4.3562e-05		44.111	2.47587
45.104	-0.000735418		45.998	0.60949		43.269	-3.92058e-05		44.289	2.47588
45.335	-0.000728414		46.229	0.60951		43.501	-4.3562e-05		44.5	2.47588
45.565	-0.00072141		46.459	0.6095		43.732	-3.92058e-05		44.66	2.47588
45.797	-0.000728414		46.691	0.60951		43.963	-2.61372e-05		44.87	2.47587
46.027	-0.000728414		46.922	0.6095		44.193	-4.3562e-05		45.083	2.47586
46.258	-0.000714406		47.154	0.60953		44.355	-3.48496e-05		45.294	2.47586
46.489	-0.000728414		47.314	0.60954		44.568	-3.48496e-05		45.52	2.47586
46.72	-0.000728414		47.527	0.60953		44.733	-3.04934e-05		45.751	2.47586
46.951	-0.000700398		47.742	0.60953		44.947	-1.74248e-05		45.982	2.47586
47.182	-0.000700398		47.903	0.60953		45.157	-1.30686e-05		46.212	2.47587
47.341	-0.000700398		48.114	0.60954		45.372	-4.3562e-06		46.444	2.47588
47.552	-0.000693394		48.332	0.60954		45.553	1.30686e-05		46.675	2.47588
47.772	-0.000672382		48.493	0.60951		45.765	0		46.834	2.47588
48.003	-0.00065137		48.704	0.60951		45.924	-8.7124e-06		47.046	2.47587
48.234	-0.000672382		48.865	0.60953		46.137	-1.30686e-05		47.265	2.47586
48.465	-0.000679386		49.078	0.60954		46.351	-8.7124e-06		47.498	2.47586
48.696	-0.00068639		49.239	0.60948		46.517	-8.7124e-06		47.728	2.47587
48.929	-0.000693394		49.45	0.6095		46.73	0		47.958	2.47587
49.161	-0.000693394		49.663	0.6095		46.94	0		48.189	2.47587
49.39	-0.000693394		49.876	0.60951		47.152	-1.74248e-05		48.421	2.47588
49.621	-0.000707402		50.102	0.60951		47.37	-2.61372e-05		48.652	2.47588
49.852	-0.000700398		50.332	0.60952		47.529	-2.61372e-05		48.883	2.47588
50.083	-0.000707402		50.564	0.60949		47.74	-1.74248e-05		49.114	2.47588
50.314	-0.000707402		50.795	0.6095		47.967	-8.7124e-06		49.347	2.47587
50.548	-0.000742422		51.025	0.6095		48.191	-8.7124e-06		49.576	2.47587
50.775	-0.00075643		51.187	0.6095		48.357	0		49.807	2.47588
51.006	-0.000777442		51.399	0.6095		48.546	-8.7124e-06		50.038	2.47587
51.237	-0.000770438		51.615	0.60951		48.737	-4.3562e-06		50.269	2.47587
51.468	-0.000770438		51.846	0.6095		48.94	-4.3562e-06		50.499	2.47587
51.628	-0.000777442		52.078	0.6095		49.151	-4.3562e-06		50.731	2.47587
51.838	-0.000784446		52.309	0.6095		49.317	0		50.963	2.47588
52.058	-0.000798454		52.539	0.6095		49.522	-8.7124e-06		51.192	2.47588
52.289	-0.00079145		52.771	0.6095		49.682	-1.74248e-05		51.352	2.47588
52.52	-0.00079145		53.004	0.6095		49.893	-2.1781e-05		51.563	2.47588
52.751	-0.00079145		53.232	0.60949		50.103	-2.61372e-05		51.722	2.47587
52.91	-0.00079145		53.464	0.60948		50.317	-2.61372e-05		51.935	2.47587
53.121	-0.00079145		53.695	0.6095		50.547	-3.48496e-05		52.147	2.47588
53.341	-0.000805457		53.925	0.60965		50.779	-2.61372e-05		52.372	2.4759
53.572	-0.000798454		54.156	0.60967		51.01	-3.04934e-05		52.603	2.47589
53.731	-0.000798454		54.387	0.60967		51.24	-4.3562e-05		52.834	2.4759
53.89	-0.000798454		54.549	0.60969		51.402	-5.22744e-05		53.064	2.4759
54.104	-0.000784446		54.76	0.60969		51.613	-4.79182e-05		53.224	2.4759
54.315	-0.000777442		54.977	0.60971		51.83	-3.92058e-05		53.435	2.4759
54.474	-0.000770438		55.208	0.60971		51.99	-2.61372e-05		53.654	2.4759
54.685	-0.000770438		55.439	0.60969		52.201	-3.04934e-05		53.816	2.47592
54.897	-0.000777442		55.672	0.60969		52.42	-3.48496e-05		53.975	2.47591
55.111	-0.000784446		55.902	0.60972		52.651	-4.3562e-05		54.186	2.47592
55.341	-0.000798454		56.132	0.60958		52.812	-4.3562e-05		54.397	2.47593
55.572	-0.000805457		56.363	0.60953		53.022	-4.79182e-05		54.556	2.47593
55.803	-0.00079145		56.595	0.60954		53.241	-4.79182e-05		54.768	2.47593
56.034	-0.00079145		56.826	0.60952		53.472	-4.3562e-05		54.979	2.47593
56.265	-0.000777442		57.057	0.60955		53.703	-4.3562e-05		55.193	2.47594
56.496	-0.000784446		57.292	0.60962		53.934	-4.79182e-05		55.423	2.47594
56.728	-0.00079145		57.52	0.60953		54.165	-4.79182e-05		55.654	2.47594
56.957	-0.00079145		57.749	0.60952		54.396	-5.22744e-05		55.885	2.47596
57.119	-0.00079145		57.912	0.60952		54.555	-6.09868e-05		56.117	2.47595
57.278	-0.000812461		58.123	0.60952		54.715	-3.48496e-05		56.348	2.47596
57.489	-0.000812461		58.34	0.60955		54.927	-2.1781e-05		56.58	2.47596
57.7	-0.000805457		58.571	0.60954		55.137	-3.04934e-05		56.811	2.47596
57.912	-0.000812461		58.804	0.60949		55.351	-3.04934e-05		57.04	2.47597
58.138	-0.000812461		59.032	0.60949		55.575	-3.48496e-05		57.271	2.47597
58.369	-0.000812461		59.263	0.60948		55.734	-3.04934e-05		57.502	2.47597
58.599	-0.000812461		59.494	0.60948		55.893	-2.61372e-05		57.733	2.47598
58.831	-0.000819465		59.726	0.6095		56.105	-3.04934e-05		57.965	2.47598
59.061	-0.000812461		59.957	0.6095		56.315	-4.3562e-05		58.128	2.47598
59.293	-0.000819465		60.188	0.60951		56.527	-4.3562e-05		58.337	2.47599
59.524	-0.000819465		60.421	0.60952		56.754	-3.48496e-05		58.554	2.47599
59.755	-0.000826469		60.65	0.60961		56.985	-3.48496e-05		58.785	2.47598
59.986	-0.000833473		60.881	0.60971		57.216	-4.79182e-05		59.016	2.47597
60.217	-0.000826469		61.112	0.60967		57.375	-4.79182e-05		59.247	2.47598
60.448	-0.000812461		61.343	0.60967		57.535	-4.79182e-05		59.479	2.47599
60.678	-0.000826469		61.574	0.60969		57.746	-5.22744e-05		59.713	2.47597
60.838	-0.000833473		61.808	0.60969		57.957	-4.79182e-05		59.94	2.47597
61.048	-0.000847481		62.036	0.60971		58.169	-4.79182e-05		60.1	2.47597
61.269	-0.000840477		62.197	0.60969		58.396	-5.22744e-05		60.312	2.47597
61.499	-0.000840477		62.41	0.60968		58.627	-5.22744e-05		60.53	2.47597
61.73	-0.000833473		62.626	0.60968		58.858	-5.22744e-05		60.762	2.47596
61.962	-0.000833473		62.857	0.60968		59.018	-3.92058e-05		60.991	2.47595
62.193	-0.000833473		63.089	0.60966		59.228	-4.3562e-05		61.222	2.47596
62.424	-0.000840477		63.32	0.60965		59.387	-3.92058e-05		61.453	2.47596
62.654	-0.000847481		63.55	0.60965		59.598	-3.48496e-05		61.642	2.47596
62.885	-0.000854485		63.781	0.6095		59.81	-3.04934e-05		61.853	2.48017
63.116	-0.000861489		64.013	0.6095		60.038	-3.48496e-05		62.065	2.47183
63.347	-0.000868493		64.243	0.60949		60.269	-3.92058e-05		62.224	2.46231
63.579	-0.000854485		64.421	0.60948		60.431	-3.92058e-05		62.435	2.45196
63.81	-0.000861489		64.633	0.60948		60.655	-2.61372e-05		62.646	2.44089
63.969	-0.000868493		64.853	0.60949		60.863	-3.04934e-05		62.805	2.43016
64.129	-0.000875497		65.064	0.60948		61.031	-3.04934e-05		63.016	2.41848
64.339	-0.000882501		65.292	0.60947		61.221	-3.04934e-05		63.228	2.40776
64.552	-0.000903513		65.462	0.60948		61.381	-2.1781e-05		63.452	2.39662
64.763	-0.000910517		65.676	0.60947		61.541	-1.30686e-05		63.612	2.38615
64.988	-0.000924525		65.888	0.60948		61.755	-8.7124e-06		63.771	2.37551
65.219	-0.000938533		66.113	0.60948		61.966	0.03162		63.983	2.36444
65.45	-0.000392223		66.344	0.60951		62.129	0.04989		64.195	2.35664
65.681	0.000595338		66.602	0.6095		62.35	0.06753		64.405	2.34669
65.912	0.00181		66.822	0.60949		62.562	0.08257		64.631	2.33578
66.143	0.00298		66.994	0.60949		62.756	0.09339		64.862	2.32366
66.374	0.00422		67.216	0.60952		62.987	0.10353		65.094	2.31395
66.535	0.00513		67.43	0.6086		63.217	0.10962		65.324	2.30263
66.694	0.0063		67.622	0.60696		63.378	0.11743		65.555	2.29218
66.905	0.00764		67.857	0.60547		63.59	0.12838		65.787	2.27985
67.116	0.00874		68.02	0.60375		63.753	0.14838		66.018	2.26711
67.329	0.01012		68.215	0.60098		63.965	0.16497		66.249	2.2543
67.554	0.01154		68.396	0.59835		64.125	0.19458		66.41	2.24288
67.785	0.01261		68.616	0.59652		64.338	0.21538		66.569	2.22997
68.016	0.01399		68.828	0.59449		64.551	0.23504		66.781	2.21828
68.247	0.01575		68.99	0.59279		64.71	0.24545		66.996	2.20743
68.478	0.0175		69.203	0.59112		64.927	0.25853		67.206	2.19612
68.712	0.01916		69.413	0.58939		65.134	0.2762		67.429	2.18494
68.94	0.02086		69.625	0.58753		65.348	0.28811		67.659	2.17455
69.102	0.02275		69.854	0.58578		65.579	0.30964		67.891	2.16328
69.314	0.02453		70.087	0.58359		65.809	0.31667		68.12	2.15222
69.53	0.02633		70.316	0.58204		65.969	0.32401		68.351	2.14164
69.689	0.02806		70.547	0.58042		66.18	0.33156		68.582	2.13055
69.902	0.02977		70.778	0.57873		66.34	0.34033		68.814	2.11929
70.12	0.03163		71.008	0.57716		66.559	0.34871		69.045	2.11172
70.351	0.03382		71.24	0.57566		66.771	0.35416		69.275	2.10156
70.582	0.03566		71.472	0.57352		66.934	0.35987		69.506	2.09146
70.813	0.03744		71.702	0.57171		67.146	0.36503		69.665	2.08404
71.044	0.03877		71.933	0.57011		67.356	0.36924		69.878	2.0711
71.204	0.04046		72.164	0.56838		67.515	0.37381		70.097	2.05945
71.364	0.04224		72.395	0.5662		67.727	0.38243		70.328	2.04868
71.574	0.04431		72.626	0.56439		67.939	0.39133		70.558	2.0378
71.786	0.04635		72.857	0.5627		68.098	0.39742		70.789	2.02996
71.998	0.04836		73.089	0.56096		68.309	0.40223		71.02	2.02088
72.157	0.05042		73.32	0.55922		68.526	0.40807		71.251	2.01117
72.317	0.05249		73.55	0.55777		68.757	0.4163		71.482	2.00129
72.53	0.05469		73.78	0.55588		68.986	0.4252		71.714	1.99095
72.741	0.05682		74.012	0.55411		69.218	0.43856		71.945	1.98124
72.954	0.05916		74.245	0.55257		69.449	0.44596		72.175	1.96885
73.171	0.06156		74.474	0.55074		69.68	0.45227		72.406	1.9572
73.402	0.06391		74.706	0.54892		69.839	0.46062		72.637	1.94691
73.633	0.06654		74.936	0.54718		69.999	0.47639		72.868	1.93721
73.864	0.06909		75.167	0.5454		70.212	0.48834		73.099	1.92733
74.096	0.07054		75.33	0.54413		70.422	0.49412		73.33	1.91805
74.255	0.07255		75.544	0.54244		70.634	0.50004		73.561	1.90829
74.466	0.07435		75.758	0.54096		70.859	0.50683		73.791	1.89906
74.685	0.07642		75.989	0.53926		71.09	0.51485		74.021	1.88998
74.916	0.07842		76.22	0.53764		71.321	0.5237		74.253	1.88017
75.147	0.08038		76.384	0.53601		71.551	0.53083		74.484	1.8708
75.306	0.08242		76.576	0.53447		71.782	0.54193		74.714	1.86209
75.517	0.08442		76.759	0.5329		71.941	0.54855		74.873	1.85247
75.737	0.08645		76.971	0.53133		72.153	0.55733		75.032	1.84562
75.897	0.08786		77.183	0.52979		72.373	0.56335		75.245	1.83511
76.108	0.08967		77.4	0.52812		72.604	0.56925		75.457	1.8266
76.328	0.09145		77.631	0.52648		72.835	0.57671		75.668	1.82032
76.487	0.09284		77.862	0.52483		73.066	0.58384		75.898	1.8125
76.698	0.09439		78.093	0.52333		73.297	0.59138		76.128	1.80243
76.917	0.09627		78.324	0.52227		73.528	0.59916		76.357	1.79241
77.148	0.09789		78.555	0.52082		73.688	0.61674		76.588	1.78185
77.38	0.09983		78.785	0.51948		73.848	0.62294		76.818	1.77083
77.54	0.10198		78.948	0.51807		74.063	0.63111		77.05	1.76193
77.751	0.10411		79.16	0.51631		74.271	0.63768		77.281	1.75345
77.97	0.10592		79.376	0.51505		74.482	0.64221		77.512	1.74751
78.201	0.10816		79.607	0.51371		74.707	0.65035		77.743	1.73685
78.432	0.11034		79.842	0.51214		74.938	0.65373		77.974	1.72865
78.663	0.11256		80.07	0.5105		75.099	0.65874		78.205	1.72045
78.895	0.11503		80.299	0.50887		75.258	0.66521		78.436	1.71219
79.127	0.11742		80.462	0.50733		75.471	0.6796		78.667	1.70395
79.356	0.11985		80.674	0.50624		75.684	0.6921		78.897	1.69569
79.516	0.12222		80.89	0.50493		75.843	0.69713		79.13	1.68804
79.729	0.12383		81.12	0.50345		76.055	0.70163		79.36	1.67969
79.946	0.12594		81.281	0.50198		76.269	0.7059		79.591	1.67149
80.178	0.12811		81.494	0.50054		76.429	0.71181		79.822	1.66378
80.339	0.12966		81.71	0.499		76.641	0.71595		80.053	1.65572
80.553	0.13144		81.942	0.49761		76.853	0.72181		80.284	1.64819
80.767	0.13355		82.174	0.49663		77.066	0.72693		80.515	1.64075
80.929	0.13532		82.405	0.49527		77.297	0.7316		80.747	1.63294
81.138	0.13727		82.639	0.49384		77.457	0.73638		80.977	1.62538
81.357	0.13881		82.865	0.49225		77.618	0.74046		81.208	1.61755
81.588	0.14079		83.096	0.49079		77.83	0.74552		81.439	1.60934
81.819	0.14252		83.327	0.48977		78.044	0.75104		81.669	1.60403
82.05	0.14433		83.49	0.48848		78.255	0.75571		81.901	1.59727
82.281	0.14629		83.703	0.48711		78.48	0.76003		82.132	1.5895
82.512	0.14836		83.919	0.48563		78.639	0.76424		82.364	1.58152
82.672	0.15059		84.148	0.48415		78.853	0.7706		82.594	1.57376
82.885	0.15245		84.379	0.48309		79.013	0.77638		82.824	1.56742
83.102	0.15406		84.61	0.48143		79.225	0.7812		83.054	1.56014
83.333	0.15587		84.841	0.47988		79.437	0.78617		83.215	1.5549
83.564	0.15789		85.073	0.4781		79.596	0.78998		83.426	1.54818
83.795	0.16001		85.304	0.47659		79.809	0.7946		83.648	1.54153
84.027	0.16202		85.537	0.47488		79.971	0.79962		83.877	1.5345
84.258	0.164		85.765	0.47339		80.183	0.81041		84.107	1.52956
84.419	0.16592		85.996	0.47198		80.399	0.81859		84.338	1.52368
84.631	0.16768		86.227	0.47111		80.611	0.82634		84.569	1.51753
84.848	0.1698		86.459	0.47005		80.772	0.83276		84.8	1.51255
85.08	0.17179		86.689	0.46888		80.985	0.83802		85.031	1.50742
85.31	0.17382		86.923	0.4675		81.144	0.84417		85.263	1.50132
85.54	0.17574		87.153	0.46609		81.356	0.85097		85.494	1.49628
85.7	0.17777		87.382	0.4646		81.569	0.85735		85.725	1.49006
85.913	0.17984		87.613	0.4631		81.783	0.86209		85.884	1.48386
86.072	0.18196		87.844	0.46163		82.015	0.86728		86.044	1.47735
86.283	0.18394		88.075	0.46041		82.247	0.87301		86.254	1.47072
86.444	0.18598		88.307	0.45903		82.407	0.88034		86.466	1.46456
86.653	0.18813		88.538	0.45764		82.567	0.88475		86.677	1.45862
86.865	0.19019		88.769	0.4563		82.778	0.88927		86.903	1.45238
87.079	0.1922		88.999	0.45475		82.988	0.89294		87.134	1.44802
87.31	0.19428		89.23	0.4534		83.201	0.89803		87.365	1.44213
87.541	0.19637		89.461	0.45193		83.424	0.90352		87.598	1.43744
87.772	0.19839		89.692	0.45063		83.655	0.90808		87.828	1.4328
88.002	0.20036		89.923	0.4493		83.886	0.91206		88.058	1.42766
88.234	0.2022		90.157	0.44796		84.117	0.91615		88.289	1.4226
88.465	0.20405		90.385	0.44658		84.277	0.92027		88.52	1.41722
88.696	0.20591		90.547	0.44519		84.436	0.92402		88.679	1.41245
88.927	0.20772		90.76	0.44386		84.647	0.92803		88.839	1.40738
89.158	0.20958		90.975	0.44241		84.858	0.93197		89.05	1.40236
89.318	0.21142		91.206	0.44092		85.07	0.93503		89.263	1.39679
89.531	0.21315		91.439	0.43928		85.26	0.94029		89.473	1.39104
89.747	0.21492		91.67	0.43795		85.471	0.94397		89.7	1.38492
89.98	0.21615		91.899	0.43657		85.682	0.94784		89.931	1.37918
90.211	0.21779		92.13	0.43521		85.841	0.95315		90.163	1.37324
90.44	0.21934		92.361	0.43383		86.052	0.95664		90.323	1.36756
90.672	0.22081		92.592	0.43241		86.266	0.95945		90.534	1.36162
90.903	0.22245		92.823	0.43098		86.475	0.96243		90.752	1.35551
91.133	0.22427		93.054	0.42961		86.704	0.9657		90.983	1.34951
91.291	0.22605		93.215	0.42829		86.864	0.96768		91.214	1.3437
91.451	0.22787		93.428	0.42696		87.023	0.97041		91.446	1.33798
91.662	0.22953		93.644	0.42568		87.235	0.97417		91.678	1.33397
91.873	0.23128		93.875	0.42419		87.447	0.97737		91.907	1.32915
92.085	0.23302		94.106	0.42291		87.658	0.9842		92.138	1.32392
92.313	0.2348		94.338	0.42157		87.883	0.98822		92.369	1.31956
92.544	0.23654		94.57	0.42035		88.046	0.99168		92.6	1.31441
92.774	0.23817		94.8	0.41897		88.254	0.99507		92.759	1.30868
93.006	0.23976		95.031	0.41774		88.473	0.99865		92.918	1.3035
93.237	0.24136		95.262	0.41649		88.633	1.00143		93.129	1.29878
93.468	0.24341		95.493	0.41561		88.844	1.00396		93.344	1.29445
93.699	0.24524		95.724	0.4145		89.005	1.0071		93.55	1.2892
93.93	0.24693		95.956	0.41329		89.218	1.01024		93.78	1.2845
94.162	0.248		96.187	0.4119		89.429	1.01334		94.01	1.2794
94.321	0.24943		96.417	0.41066		89.652	1.01578		94.169	1.27382
94.531	0.25069		96.648	0.40958		89.883	1.01891		94.38	1.26811
94.749	0.25189		96.879	0.40861		90.115	1.02257		94.6	1.26254
94.981	0.2534		97.11	0.40738		90.347	1.02521		94.831	1.25705
95.212	0.25497		97.341	0.40644		90.506	1.02775		95.063	1.25183
95.444	0.2565		97.575	0.40533		90.718	1.03054		95.293	1.24579
95.674	0.25813		97.803	0.40416		90.935	1.03307		95.524	1.24226
95.904	0.25975		98.034	0.40284		91.166	1.03586		95.756	1.23749
96.064	0.26148		98.196	0.40156		91.397	1.0394		95.985	1.23242
96.274	0.26316		98.411	0.40028		91.579	1.04307		96.216	1.22716
96.496	0.2649		98.624	0.3991		91.79	1.04628		96.376	1.22199
96.727	0.26659		98.857	0.39777		91.951	1.04941		96.587	1.21701
96.956	0.2687		99.088	0.39655		92.164	1.0527		96.806	1.21202
97.116	0.27047		99.317	0.3957		92.375	1.05601		96.966	1.20703
97.329	0.2724		99.548	0.39459		92.536	1.05879		97.177	1.20213
97.547	0.2746		99.779	0.39359		92.748	1.06171		97.397	1.19747
97.779	0.2764		100.01	0.39269		92.96	1.06453		97.63	1.19268
98.009	0.27806		100.241	0.39166		93.172	1.0677		97.861	1.1875
98.169	0.27985		100.472	0.39043		93.396	1.07125		98.09	1.18221
98.33	0.28231		100.632	0.38918		93.555	1.07577		98.321	1.17732
98.541	0.28574		100.793	0.38803		93.769	1.07916		98.552	1.17272
98.752	0.28912		101.004	0.3869		93.928	1.08288		98.793	1.16808
98.913	0.29144		101.216	0.38563		94.14	1.08635		99.021	1.16325
99.124	0.29342		101.428	0.3847		94.3	1.08984		99.246	1.15872
99.336	0.29559		101.651	0.38345		94.512	1.09393		99.411	1.15407
99.497	0.29716		101.811	0.38228		94.724	1.0982		99.621	1.14951
99.707	0.29878		102.024	0.381		94.937	1.10586		99.834	1.14635
99.918	0.30025		102.241	0.37974		95.165	1.11004		99.997	1.14213
100.137	0.30186		102.474	0.37851		95.327	1.11272		100.227	1.13862
100.368	0.30341		102.704	0.37728		95.487	1.11814		100.426	1.13495
100.599	0.30499		102.934	0.37636		95.699	1.12282		100.656	1.13083
100.83	0.30648		103.095	0.37539		95.911	1.12559		100.889	1.12661
101.063	0.30787		103.255	0.37437		96.122	1.12929		101.118	1.12239
101.293	0.30924		103.467	0.37305		96.343	1.13379		101.352	1.11784
101.524	0.31023		103.679	0.37184		96.574	1.13869		101.585	1.11325
101.755	0.31156		103.893	0.37065		96.805	1.14304		101.745	1.11027
101.986	0.31351		104.114	0.36949		97.036	1.14827		101.956	1.10646
102.217	0.31459		104.345	0.36824		97.199	1.15197		102.116	1.10226
102.448	0.31582		104.576	0.36693		97.359	1.15772		102.329	1.09926
102.68	0.31713		104.806	0.36573		97.571	1.16149		102.488	1.09601
102.911	0.31831		105.038	0.36459		97.783	1.16495		102.701	1.09173
103.141	0.31951		105.27	0.36359		97.995	1.1688		102.911	1.0882
103.301	0.3208		105.5	0.3626		98.216	1.17226		103.071	1.08467
103.514	0.32213		105.731	0.36146		98.375	1.17676		103.283	1.08126
103.732	0.32336		105.962	0.36034		98.535	1.18884		103.495	1.0771
103.912	0.32465		106.193	0.35909		98.749	1.19289		103.708	1.07277
104.123	0.32564		106.424	0.35809		98.961	1.19736		103.868	1.06864
104.283	0.32688		106.66	0.35721		99.122	1.20238		104.08	1.06482
104.493	0.32813		106.886	0.35613		99.335	1.21094		104.298	1.06069
104.705	0.32949		107.116	0.35496		99.546	1.21581		104.53	1.05603
104.916	0.33104		107.346	0.35372		99.756	1.21925		104.763	1.05178
105.075	0.33246		107.578	0.35256		99.984	1.22295		104.99	1.04767
105.287	0.33398		107.809	0.35174		100.215	1.22657		105.222	1.0436
105.499	0.33537		108.04	0.35052		100.447	1.23053		105.453	1.03973
105.729	0.33679		108.271	0.34942		100.606	1.23381		105.684	1.03588
105.963	0.3381		108.433	0.34822		100.819	1.23665		105.915	1.03221
106.19	0.33935		108.644	0.34714		100.982	1.23933		106.147	1.02842
106.421	0.34027		108.86	0.34592		101.192	1.24271		106.379	1.02454
106.652	0.34139		109.091	0.34475		101.351	1.24783		106.608	1.02187
106.883	0.34262		109.322	0.34343		101.564	1.2518		106.766	1.01833
107.114	0.3438		109.555	0.34226		101.777	1.25524		106.925	1.01466
107.273	0.34496		109.785	0.34115		101.989	1.25877		107.139	1.01095
107.486	0.34586		110.015	0.34003		102.213	1.26256		107.35	1.00733
107.645	0.34691		110.246	0.33876		102.449	1.26595		107.564	1.00369
107.855	0.34812		110.477	0.33735		102.675	1.26875		107.787	0.99995
108.015	0.34918		110.708	0.33622		102.836	1.2729		108.018	0.9962
108.225	0.35042		110.94	0.33496		102.996	1.2762		108.249	0.9926
108.436	0.35179		111.172	0.33378		103.205	1.27966		108.481	0.9902
108.652	0.35326		111.333	0.33266		103.431	1.28177		108.714	0.98687
108.883	0.355		111.493	0.3315		103.589	1.28483		108.942	0.98349
109.044	0.35648		111.705	0.33033		103.799	1.28794		109.103	0.97988
109.254	0.35776		111.917	0.32917		104.011	1.29111		109.263	0.9765
109.473	0.35902		112.078	0.32812		104.221	1.29531		109.473	0.97307
109.704	0.36028		112.295	0.32681		104.444	1.29923		109.684	0.96942
109.935	0.36168		112.507	0.32559		104.674	1.30312		109.897	0.96621
110.166	0.36295		112.723	0.32462		104.905	1.30672		110.12	0.96297
110.325	0.36428		112.939	0.32368		105.136	1.30896		110.351	0.96023
110.536	0.36554		113.171	0.3225		105.367	1.31197		110.583	0.95739
110.756	0.3669		113.403	0.32141		105.598	1.31449		110.814	0.95451
110.987	0.36828		113.566	0.32058		105.831	1.31871		111.046	0.95123
111.218	0.36956		113.776	0.31946		106.062	1.32111		111.278	0.94854
111.449	0.37071		113.991	0.31841		106.291	1.32337		111.507	0.94575
111.68	0.37173		114.222	0.31715		106.452	1.32599		111.739	0.94244
111.913	0.3729		114.454	0.31601		106.613	1.32753		111.968	0.93893
112.142	0.37417		114.686	0.31472		106.824	1.33014		112.199	0.93631
112.373	0.37546		114.913	0.31367		107.036	1.33311		112.43	0.93366
112.604	0.37679		115.144	0.31282		107.196	1.33487		112.662	0.93069
112.835	0.37814		115.375	0.31176		107.408	1.33727		112.899	0.928
113.066	0.37938		115.606	0.3106		107.619	1.34127		113.123	0.92494
113.297	0.3806		115.84	0.30955		107.834	1.34392		113.354	0.92176
113.529	0.3819		116.07	0.30831		108.061	1.34764		113.586	0.91864
113.76	0.38319		116.231	0.30755		108.291	1.35199		113.816	0.91539
113.99	0.38465		116.444	0.30655		108.522	1.35622		114.047	0.91207
114.15	0.38595		116.658	0.30553		108.753	1.35912		114.28	0.90889
114.362	0.38738		116.89	0.30408		108.984	1.36237		114.514	0.90503
114.581	0.38866		117.122	0.30276		109.216	1.36575		114.74	0.90179
114.811	0.39001		117.353	0.30167		109.448	1.3688		114.971	0.89846
115.044	0.39132		117.582	0.30056		109.607	1.3721		115.202	0.89605
115.273	0.39257		117.813	0.29971		109.819	1.37382		115.362	0.89358
115.434	0.3938		118.044	0.29867		110.036	1.37571		115.572	0.89061
115.595	0.3947		118.275	0.2976		110.267	1.37784		115.731	0.88798
115.806	0.39589		118.507	0.29665		110.498	1.38008		115.945	0.88461
116.021	0.3971		118.738	0.29549		110.689	1.38282		116.153	0.8815
116.182	0.39831		118.968	0.29449		110.903	1.38502		116.314	0.87814
116.395	0.39949		119.199	0.29347		111.116	1.3866		116.473	0.87503
116.604	0.40072		119.43	0.29237		111.329	1.38869		116.685	0.87211
116.815	0.40158		119.661	0.29144		111.548	1.39148		116.897	0.86915
116.975	0.40272		119.892	0.29024		111.707	1.39353		117.108	0.86617
117.185	0.40377		120.123	0.28928		111.92	1.396		117.329	0.86307
117.345	0.40502		120.355	0.28824		112.138	1.39858		117.561	0.86003
117.556	0.40614		120.586	0.28754		112.298	1.40111		117.791	0.85674
117.767	0.40705		120.816	0.28665		112.511	1.40354		118.022	0.85369
117.927	0.408		121.047	0.28583		112.73	1.40534		118.254	0.85147
118.138	0.40879		121.278	0.28508		112.889	1.40754		118.485	0.8485
118.349	0.40956		121.509	0.28425		113.102	1.40966		118.716	0.84563
118.579	0.41029		121.74	0.28313		113.319	1.4115		118.947	0.84245
118.809	0.41115		121.973	0.28222		113.55	1.41393		119.181	0.83946
118.97	0.41211		122.203	0.28113		113.782	1.41701		119.409	0.83645
119.183	0.41314		122.433	0.28036		113.941	1.41957		119.57	0.83355
119.342	0.41413		122.664	0.27943		114.103	1.42171		119.73	0.83062
119.553	0.41567		122.895	0.27846		114.315	1.42513		119.941	0.82777
119.764	0.41667		123.126	0.2775		114.526	1.42831		120.154	0.82496
119.991	0.41762		123.357	0.27692		114.685	1.4307		120.367	0.82213
120.22	0.41856		123.59	0.27597		114.897	1.43278		120.588	0.81873
120.45	0.41947		123.82	0.27488		115.085	1.43497		120.748	0.81568
120.682	0.4203		124.05	0.274		115.27	1.43724		120.907	0.81249
120.914	0.42091		124.281	0.27332		115.482	1.44003		121.117	0.80978
121.143	0.42167		124.512	0.2724		115.694	1.44167		121.33	0.80697
121.303	0.42254		124.743	0.27123		115.909	1.44403		121.489	0.80416
121.463	0.42337		124.974	0.27058		116.14	1.44605		121.701	0.80135
121.674	0.42653		125.206	0.26993		116.371	1.44811		121.913	0.79854
121.885	0.43		125.37	0.26889		116.602	1.44998		122.128	0.79567
122.097	0.43124		125.56	0.26777		116.833	1.45122		122.357	0.79279
122.322	0.43224		125.745	0.26698		117.009	1.4532		122.588	0.78868
122.554	0.4332		125.956	0.26564		117.223	1.45558		122.819	0.7853
122.785	0.43432		126.167	0.26444		117.435	1.45856		123.05	0.7834
122.95	0.43661		126.384	0.26348		117.653	1.46156		123.212	0.78098
123.163	0.43748		126.615	0.26282		117.813	1.46326		123.423	0.77826
123.374	0.43821		126.846	0.2616		117.978	1.46448		123.64	0.77573
123.605	0.43902		127.077	0.26036		118.188	1.4661		123.871	0.77336
123.837	0.44027		127.308	0.25942		118.4	1.47419		124.102	0.77047
124.067	0.44156		127.539	0.25836		118.611	1.48801		124.333	0.76772
124.299	0.44262		127.772	0.25733		118.774	1.49036		124.492	0.76507
124.53	0.44334		128.001	0.25651		118.986	1.49261		124.703	0.76251
124.761	0.44417		128.232	0.25576		119.199	1.4946		124.923	0.75987
124.991	0.445		128.462	0.25486		119.421	1.49638		125.083	0.75658
125.222	0.44596		128.694	0.25388		119.652	1.49816		125.294	0.75397
125.453	0.44749		128.925	0.25333		119.883	1.50024		125.514	0.75142
125.684	0.44839		129.087	0.2524		120.042	1.50193		125.744	0.74883
125.915	0.44917		129.299	0.25116		120.255	1.50351		125.975	0.74642
126.147	0.45008		129.515	0.25015		120.416	1.50532		126.135	0.74398
126.377	0.45083		129.747	0.24909		120.628	1.50956		126.295	0.74159
126.608	0.45164		129.978	0.24822		120.787	1.51209		126.506	0.73918
126.839	0.4526		130.209	0.24702		120.999	1.5182		126.72	0.73684
127.07	0.45342		130.441	0.24597		121.211	1.52281		126.931	0.73438
127.229	0.45426		130.672	0.24522		121.421	1.52441		127.154	0.73199
127.44	0.4552		130.903	0.24421		121.582	1.52654		127.385	0.72952
127.663	0.45575		131.133	0.24313		121.741	1.52851		127.616	0.72705
127.894	0.45644		131.364	0.24224		121.953	1.53094		127.847	0.72453
128.123	0.45724		131.595	0.24156		122.165	1.53387		128.08	0.72208
128.354	0.45789		131.826	0.24078		122.377	1.53652		128.311	0.71952
128.516	0.45861		132.057	0.23984		122.599	1.54073		128.54	0.71703
128.729	0.45948		132.288	0.23908		122.832	1.54442		128.771	0.71444
128.945	0.46049		132.521	0.23812		123.061	1.54753		128.932	0.712
129.178	0.4614		132.75	0.2372		123.292	1.54988		129.091	0.70954
129.406	0.4623		132.981	0.23625		123.458	1.55169		129.302	0.70701
129.637	0.46311		133.212	0.23491		123.67	1.55331		129.514	0.7046
129.796	0.46413		133.443	0.23409		123.884	1.55548		129.724	0.70226
130.007	0.46535		133.673	0.23308		124.114	1.55765		129.884	0.69982
130.227	0.466		133.905	0.23232		124.274	1.55985		130.097	0.69744
130.458	0.46674		134.066	0.23136		124.486	1.56232		130.309	0.69502
130.689	0.46746		134.279	0.23029		124.704	1.56452		130.54	0.69273
130.92	0.46814		134.496	0.22927		124.935	1.56703		130.772	0.69111
131.151	0.4689		134.726	0.22838		125.166	1.56918		131.001	0.68899
131.382	0.46967		134.958	0.22739		125.398	1.57148		131.232	0.68674
131.544	0.47051		135.19	0.22649		125.63	1.57333		131.395	0.68442
131.752	0.47142		135.42	0.22547		125.863	1.57514		131.554	0.68207
131.972	0.47227		135.651	0.22444		126.09	1.57688		131.765	0.67994
132.203	0.47305		135.882	0.22347		126.321	1.57879		131.976	0.6777
132.434	0.47397		136.112	0.22252		126.552	1.58079		132.187	0.67566
132.596	0.47488		136.343	0.22146		126.783	1.58277		132.412	0.67338
132.807	0.47554		136.575	0.22038		127.014	1.5849		132.642	0.67117
133.024	0.47635		136.812	0.21931		127.246	1.58713		132.873	0.66888
133.187	0.47701		137.037	0.21845		127.406	1.58933		133.104	0.66665
133.398	0.47752		137.198	0.21754		127.618	1.5909		133.335	0.66516
133.614	0.47826		137.414	0.21644		127.835	1.59318		133.566	0.66331
133.847	0.47895		137.627	0.21561		128.066	1.59496		133.797	0.66131
134.078	0.47974		137.857	0.21463		128.298	1.59646		134.029	0.65961
134.239	0.48054		138.087	0.21359		128.532	1.59863		134.26	0.65769
134.4	0.48129		138.247	0.21261		128.759	1.60854		134.49	0.65556
134.615	0.48206		138.46	0.21171		128.99	1.61127		134.722	0.65316
134.827	0.48256		138.677	0.21078		129.15	1.61381		134.952	0.65095
135.035	0.48307		138.908	0.20982		129.314	1.61531		135.183	0.64874
135.255	0.48374		139.139	0.2089		129.531	1.61712		135.416	0.64657
135.486	0.48433		139.37	0.20798		129.74	1.61924		135.646	0.64447
135.717	0.48489		139.53	0.20707		129.901	1.62179		135.88	0.64222
135.878	0.48537		139.742	0.20646		130.113	1.62399		136.108	0.64019
136.088	0.48601		139.959	0.20581		130.306	1.62637		136.339	0.6387
136.307	0.48668		140.19	0.20488		130.466	1.62949		136.57	0.63702
136.468	0.48729		140.423	0.20386		130.678	1.63329		136.801	0.63535
136.679	0.48801		140.653	0.20323		130.839	1.65637		137.031	0.63371
136.898	0.4887		140.883	0.20248		131.058	1.66273		137.19	0.63179
137.131	0.48947		141.045	0.20177		131.27	1.6788		137.401	0.6297
137.362	0.4902		141.257	0.20093		131.431	1.68178		137.622	0.62758
137.591	0.49094		141.473	0.2001		131.642	1.68425		137.852	0.62556
137.822	0.49172		141.706	0.19927		131.853	1.68675		138.083	0.62426
138.053	0.49227		141.937	0.19839		132.067	1.68949		138.315	0.62246
138.284	0.49293		142.097	0.19742		132.227	1.69212		138.547	0.62048
138.445	0.49357		142.309	0.19637		132.39	1.69545		138.778	0.61854
138.655	0.49433		142.526	0.19545		132.598	1.69823		139.008	0.61643
138.874	0.49513		142.757	0.19445		132.811	1.70159		139.239	0.61408
139.105	0.49566		142.991	0.19357		132.979	1.70378		139.47	0.61207
139.265	0.49637		143.221	0.19287		133.189	1.70584		139.701	0.61005
139.476	0.49707		143.451	0.19191		133.399	1.70852		139.932	0.60795
139.697	0.4976		143.681	0.19101		133.611	1.71056		140.162	0.60598
139.928	0.4983		143.913	0.19016		133.833	1.7126		140.321	0.60394
140.157	0.49905		144.143	0.18939		134.065	1.7153		140.48	0.60258
140.388	0.49958		144.374	0.18837		134.297	1.71705		140.69	0.60105
140.619	0.50036		144.605	0.18733		134.463	1.71899		140.901	0.59922
140.779	0.50102		144.836	0.18634		134.673	1.72094		141.114	0.59758
140.989	0.50168		144.996	0.18542		134.837	1.72292		141.345	0.59582
141.209	0.50233		145.155	0.18449		135.048	1.72492		141.573	0.59387
141.44	0.50267		145.367	0.18388		135.211	1.72631		141.804	0.5919
141.671	0.50346		145.578	0.18298		135.423	1.72766		142.034	0.59062
141.902	0.50406		145.789	0.18185		135.634	1.7293		142.265	0.5889
142.133	0.50473		146.016	0.18105		135.799	1.73124		142.496	0.58707
142.364	0.50529		146.247	0.18017		136.011	1.73303		142.73	0.58508
142.595	0.50602		146.478	0.17954		136.228	1.73444		142.96	0.58318
142.827	0.50677		146.709	0.1786		136.437	1.73574		143.193	0.58112
143.057	0.50764		146.94	0.17792		136.603	1.73676		143.42	0.57921
143.288	0.50869		147.172	0.17717		136.816	1.73769		143.651	0.57725
143.519	0.50936		147.403	0.17637		137.027	1.73917		143.883	0.57549
143.75	0.51027		147.634	0.17565		137.189	1.74089		144.114	0.57365
143.981	0.51127		147.865	0.17496		137.402	1.74255		144.344	0.57241
144.212	0.51198		148.096	0.17422		137.561	1.74402		144.575	0.57075
144.444	0.51249		148.329	0.1736		137.774	1.74622		144.806	0.56897
144.674	0.51306		148.557	0.1728		137.984	1.747		145.037	0.5677
144.905	0.51363		148.788	0.1721		138.197	1.74821		145.268	0.56597
145.136	0.51404		149.019	0.17131		138.357	1.74992		145.499	0.56421
145.296	0.5146		149.25	0.1707		138.57	1.75166		145.733	0.5623
145.506	0.5152		149.481	0.16995		138.782	1.75349		145.963	0.56037
145.666	0.51573		149.712	0.16926		139.013	1.75491		146.195	0.55848
145.877	0.51629		149.943	0.16847		139.24	1.75718		146.423	0.55659
146.037	0.51684		150.175	0.16768		139.405	1.75942		146.583	0.55465
146.254	0.51739		150.406	0.16701		139.564	1.76169		146.795	0.55272
146.465	0.51794		150.636	0.16628		139.777	1.76283		146.956	0.55098
146.677	0.51836		150.867	0.16541		139.989	1.76427		147.168	0.54925
146.904	0.51885		151.098	0.1646		140.201	1.76633		147.38	0.54809
147.135	0.51944		151.329	0.1638		140.363	1.76846		147.602	0.54647
147.366	0.52008		151.56	0.1629		140.573	1.77028		147.833	0.54489
147.597	0.52068		151.791	0.16211		140.786	1.77194		148.064	0.5436
147.828	0.52125		152.024	0.16151		140.946	1.77356		148.296	0.54169
147.991	0.52177		152.255	0.16074		141.156	1.77499		148.527	0.54016
148.15	0.52229		152.484	0.16003		141.37	1.77637		148.714	0.53833
148.362	0.52271		152.715	0.15924		141.53	1.77793		148.925	0.53666
148.572	0.52321		152.946	0.15836		141.741	1.77976		149.137	0.53493
148.783	0.52372		153.177	0.15752		141.957	1.78119		149.349	0.53321
149.008	0.52429		153.408	0.15666		142.188	1.78298		149.58	0.53136
149.167	0.52489		153.64	0.15595		142.419	1.78436		149.808	0.53005
149.379	0.52565		153.871	0.15492		142.579	1.78614		150.039	0.52841
149.598	0.52618		154.101	0.15444		142.79	1.78767		150.27	0.52695
149.828	0.52703		154.262	0.15366		143.013	1.78927		150.501	0.52535
150.06	0.52795		154.475	0.15297		143.24	1.79083		150.733	0.52393
150.291	0.52877		154.692	0.1524		143.471	1.79288		150.964	0.52226
150.521	0.52921		154.925	0.15157		143.702	1.7942		151.197	0.52084
150.753	0.52976		155.118	0.15088		143.865	1.79594		151.427	0.51936
150.984	0.53022		155.33	0.15017		144.024	1.79728		151.656	0.51802
151.214	0.53071		155.541	0.14963		144.237	1.79868		151.887	0.51628
151.446	0.53117		155.752	0.14878		144.449	1.80032		152.118	0.51476
151.677	0.53166		155.913	0.14872		144.611	1.80135		152.349	0.51354
151.907	0.53213		156.124	0.14728		144.821	1.80297		152.58	0.51212
152.138	0.53261		156.338	0.1468		145.034	1.8085		152.739	0.51053
152.369	0.53312		156.562	0.14592		145.246	1.81436		152.95	0.50892
152.6	0.53372		156.793	0.14527		145.472	1.81721		153.171	0.50734
152.831	0.53413		157.024	0.14464		145.703	1.81917		153.402	0.50578
153.062	0.53454		157.256	0.14397		145.863	1.82072		153.633	0.50416
153.294	0.53499		157.488	0.14313		146.073	1.82222		153.864	0.50266
153.524	0.53531		157.717	0.14219		146.234	1.82296		154.05	0.50105
153.684	0.53573		157.879	0.14123		146.446	1.82465		154.263	0.49955
153.897	0.53619		158.09	0.14064		146.607	1.82654		154.473	0.49793
154.115	0.53668		158.251	0.13984		146.82	1.82775		154.684	0.49642
154.347	0.53711		158.466	0.13887		147.032	1.83081		154.847	0.49489
154.506	0.53763		158.679	0.13816		147.246	1.83811		155.055	0.49379
154.717	0.53816		158.896	0.13761		147.473	1.84026		155.214	0.49248
154.936	0.53859		159.127	0.137		147.704	1.84217		155.428	0.49104
155.167	0.53903		159.358	0.13646		147.935	1.84326		155.637	0.4898
155.398	0.53933		159.59	0.13569		148.166	1.84497		155.864	0.48837
155.633	0.53965		159.82	0.13498		148.398	1.8458		156.095	0.48687
155.861	0.54008		159.981	0.13428		148.628	1.84694		156.324	0.4853
156.091	0.54048		160.194	0.13365		148.859	1.84802		156.555	0.48376
156.322	0.54076		160.41	0.13279		149.021	1.84941		156.717	0.4822
156.553	0.54106		160.641	0.13212		149.233	1.8506		156.928	0.48067
156.784	0.54146		160.874	0.13132		149.394	1.85178		157.146	0.47911
157.015	0.5419		161.103	0.13053		149.605	1.85283		157.376	0.4781
157.247	0.54242		161.283	0.12977		149.767	1.8541		157.607	0.47694
157.479	0.54293		161.495	0.12891		149.978	1.85516		157.838	0.47551
157.708	0.54335		161.706	0.12814		150.188	1.85647		158.069	0.47432
157.867	0.5438		161.923	0.12733		150.401	1.85751		158.3	0.4729
158.079	0.54417		162.155	0.12658		150.628	1.85909		158.531	0.47138
158.299	0.54454		162.388	0.12577		150.858	1.86061		158.762	0.46993
158.53	0.54484		162.616	0.12531		151.019	1.8613		158.921	0.46836
158.762	0.54527		162.847	0.12472		151.18	1.86254		159.08	0.46685
158.993	0.54563		163.078	0.12394		151.391	1.86369		159.291	0.46536
159.223	0.54603		163.309	0.12315		151.603	1.86489		159.503	0.46387
159.454	0.5464		163.54	0.1225		151.764	1.86622		159.714	0.46233
159.685	0.5468		163.771	0.12191		151.974	1.8672		159.941	0.46075
159.916	0.54723		163.938	0.12134		152.186	1.86856		160.172	0.45927
160.147	0.54763		164.15	0.12044		152.346	1.87003		160.403	0.45774
160.378	0.54796		164.362	0.11961		152.558	1.87206		160.634	0.45608
160.609	0.54837		164.592	0.11879		152.718	1.87323		160.865	0.45453
160.769	0.54878		164.824	0.11796		152.931	1.87433		161.097	0.45297
160.929	0.54957		165.053	0.1174		153.141	1.8756		161.328	0.45155
161.139	0.55007		165.214	0.11668		153.353	1.8771		161.558	0.45013
161.35	0.55032		165.428	0.11591		153.513	1.87877		161.789	0.44864
161.561	0.55084		165.644	0.11506		153.724	1.88016		161.949	0.4473
161.721	0.55132		165.874	0.11433		153.936	1.88111		162.161	0.44578
161.935	0.55179		166.106	0.11346		154.096	1.88224		162.38	0.44442
162.147	0.55235		166.268	0.1127		154.255	1.88371		162.613	0.44311
162.379	0.55337		166.465	0.11199		154.468	1.88486		162.843	0.44158
162.609	0.55397		166.697	0.11121		154.681	1.88611		163.073	0.44016
162.769	0.55436		166.928	0.11052		154.84	1.88782		163.304	0.43875
162.981	0.55472		167.159	0.10999		155.052	1.88895		163.535	0.43779
163.199	0.55498		167.389	0.10926		155.265	1.89072		163.766	0.43649
163.43	0.55544		167.622	0.10855		155.477	1.89171		163.997	0.43539
163.663	0.55581		167.852	0.10793		155.701	1.89322		164.157	0.43419
163.892	0.55609		168.083	0.10701		155.931	1.8949		164.369	0.4329
164.123	0.55641		168.314	0.10623		156.163	1.89573		164.587	0.43184
164.283	0.5567		168.545	0.1055		156.324	1.89695		164.818	0.43075
164.444	0.55705		168.776	0.1048		156.485	1.89926		165.049	0.42962
164.653	0.55742		169.006	0.10433		156.696	1.9003		165.28	0.4285
164.865	0.55775		169.239	0.10368		156.911	1.90128		165.512	0.42721
165.076	0.55819		169.468	0.10294		157.122	1.90324		165.741	0.42596
165.235	0.55882		169.699	0.10215		157.282	1.90496		165.973	0.42454
165.395	0.55948		169.93	0.10162		157.494	1.90618		166.203	0.42308
165.605	0.55988		170.161	0.10097		157.705	1.90765		166.434	0.42177
165.817	0.56032		170.392	0.1002		157.931	1.90961		166.664	0.42044
166.03	0.56082		170.624	0.09939		158.163	1.9116		166.897	0.41905
166.25	0.56123		170.855	0.09871		158.322	1.91248		167.128	0.41767
166.481	0.56159		171.087	0.09795		158.482	1.91348		167.358	0.41632
166.713	0.56195		171.317	0.09724		158.694	1.9149		167.589	0.41496
166.944	0.56242		171.48	0.09655		158.905	1.91601		167.82	0.41357
167.174	0.56301		171.692	0.09588		159.117	1.91859		168.051	0.41269
167.405	0.56338		171.907	0.09522		159.341	1.92052		168.282	0.41156
167.636	0.56377		172.138	0.09468		159.504	1.92101		168.514	0.41029
167.867	0.56405		172.299	0.094		159.664	1.92222		168.673	0.40738
168.098	0.56435		172.512	0.09355		159.875	1.92418		168.832	0.40432
168.329	0.56475		172.728	0.09291		160.087	1.92505		169.043	0.40187
168.56	0.56514		172.959	0.09231		160.298	1.92686		169.254	0.40088
168.792	0.56561		173.19	0.09159		160.52	1.93177		169.465	0.39978
169.022	0.5659		173.424	0.09097		160.751	1.93498		169.624	0.39855
169.197	0.56626		173.652	0.09048		160.983	1.93816		169.785	0.39751
169.41	0.56649		173.813	0.08981		161.215	1.94038		169.997	0.39649
169.621	0.56678		174.025	0.08905		161.445	1.94277		170.207	0.39536
169.846	0.56713		174.242	0.08829		161.605	1.94556		170.418	0.39421
170.074	0.5675		174.473	0.0876		161.765	1.94704		170.642	0.39281
170.305	0.56795		174.705	0.08686		161.977	1.9489		170.872	0.39138
170.536	0.56825		174.866	0.08637		162.188	1.95138		171.103	0.38997
170.767	0.56863		175.079	0.08563		162.4	1.9535		171.335	0.3887
170.998	0.56897		175.294	0.08504		162.56	1.95555		171.566	0.38742
171.23	0.56937		175.525	0.08435		162.772	1.95798		171.797	0.3865
171.464	0.56979		175.757	0.08366		162.986	1.95956		172.029	0.38528
171.695	0.57007		175.988	0.08271		163.214	1.96157		172.258	0.38408
171.923	0.57042		176.218	0.08175		163.447	1.96297		172.489	0.38271
172.154	0.57071		176.379	0.08104		163.682	1.96449		172.72	0.38143
172.385	0.57111		176.591	0.08037		163.907	1.96589		172.951	0.38015
172.617	0.57134		176.808	0.07956		164.137	1.96735		173.183	0.37925
172.855	0.57169		177.04	0.07892		164.368	1.9688		173.413	0.37797
173.081	0.57194		177.271	0.07814		164.53	1.97002		173.573	0.37673
173.309	0.57238		177.503	0.07734		164.74	1.9718		173.732	0.37578
173.54	0.57283		177.732	0.07666		164.959	1.9728		173.947	0.37457
173.772	0.57314		177.963	0.07583		165.19	1.97402		174.155	0.37329
174.001	0.57356		178.194	0.07532		165.421	1.97726		174.367	0.37197
174.232	0.57516		178.425	0.07462		165.652	1.97937		174.593	0.37057
174.463	0.57643		178.656	0.07392		165.883	1.98058		174.824	0.36963
174.694	0.57749		178.889	0.07327		166.114	1.98122		175.055	0.36856
174.925	0.57851		179.05	0.07262		166.346	1.98275		175.284	0.36731
175.156	0.57914		179.262	0.07216		166.575	1.98412		175.515	0.36621
175.387	0.57975		179.477	0.07152		166.736	1.98491		175.747	0.36507
175.618	0.58025		179.637	0.0709		166.896	1.98631		175.978	0.36376
175.849	0.58094		179.799	0.07025		167.109	1.98729		176.137	0.36254
176.08	0.58142		180.012	0.06954		167.322	1.98841		176.297	0.36132
176.311	0.58183		180.224	0.06902		167.535	1.98914		176.507	0.36008
176.542	0.58247		180.435	0.0683		167.754	1.99051		176.717	0.35878
176.773	0.58282		180.595	0.06771		167.985	1.99186		176.886	0.35759
177.004	0.58315		180.806	0.06697		168.217	1.99331		177.093	0.35624
177.235	0.58352		180.967	0.06621		168.449	1.99428		177.303	0.35494
177.466	0.58377		181.181	0.06555		168.681	1.9949		177.464	0.35411
177.697	0.58411		181.394	0.06486		168.909	1.9965		177.674	0.35306
177.928	0.58444		181.555	0.06422		169.14	1.99787		177.839	0.3519
178.158	0.58465		181.771	0.06358		169.3	1.9993		178.05	0.35089
178.39	0.58491		181.981	0.06294		169.511	2.00044		178.261	0.34969
178.621	0.58509		182.196	0.06224		169.732	2.00134		178.471	0.34887
178.853	0.58533		182.427	0.06151		169.962	2.00285		178.696	0.34778
179.083	0.5855		182.658	0.06104		170.122	2.00382		178.928	0.34665
179.314	0.58573		182.891	0.0604		170.334	2.00523		179.157	0.34515
179.546	0.58593		183.122	0.05961		170.551	2.00704		179.388	0.34387
179.776	0.58618		183.351	0.05907		170.711	2.00809		179.619	0.34266
180.007	0.58644		183.582	0.05841		170.923	2.00954		179.85	0.34142
180.238	0.5867		183.813	0.05783		171.141	2.01065		180.081	0.34052
180.469	0.58697		184.044	0.05734		171.372	2.01302		180.314	0.33956
180.699	0.58779		184.275	0.05668		171.603	2.01498		180.548	0.33841
180.93	0.58919		184.506	0.05596		171.834	2.01578		180.775	0.33741
181.162	0.58987		184.666	0.05536		172.068	2.01729		181.004	0.33631
181.394	0.59011		184.879	0.05487		172.298	2.01908		181.235	0.33515
181.623	0.59039		185.096	0.05409		172.527	2.02054		181.466	0.33397
181.793	0.59052		185.327	0.05358		172.687	2.02226		181.697	0.33273
182.024	0.59086		185.558	0.05296		172.899	2.02367		181.857	0.33152
182.255	0.59097		185.789	0.05247		173.116	2.0258		182.069	0.33011
182.488	0.59108		186.022	0.05171		173.349	2.0271		182.287	0.32889
182.716	0.59125		186.251	0.05107		173.58	2.02825		182.518	0.3276
182.948	0.59139		186.414	0.0505		173.739	2.02825		182.749	0.3264
183.178	0.59153		186.627	0.05008		173.899	2.02937		182.98	0.3252
183.409	0.59163		186.841	0.04975		174.113	2.031		183.139	0.32406
183.64	0.59179		187.073	0.04905		174.322	2.03259		183.35	0.32287
183.871	0.59198		187.305	0.0481		174.482	2.03425		183.511	0.3215
184.102	0.59221		187.534	0.04748		174.693	2.03593		183.721	0.32
184.333	0.59231		187.765	0.0469		174.881	2.03697		183.933	0.31878
184.567	0.59241		187.996	0.04659		175.065	2.03728		184.159	0.31761
184.795	0.59261		188.226	0.04628		175.277	2.03887		184.39	0.31647
185.026	0.59282		188.458	0.04583		175.488	2.04075		184.621	0.31539
185.257	0.59289		188.689	0.04513		175.705	2.04183		184.852	0.3143
185.488	0.59311		188.92	0.04407		175.868	2.04261		185.083	0.31318
185.719	0.59332		189.151	0.04341		176.079	2.04343		185.245	0.31201
185.95	0.59361		189.314	0.04306		176.296	2.04488		185.455	0.31094
186.11	0.59387		189.539	0.04262		176.527	2.04588		185.672	0.31021
186.322	0.59406		189.7	0.04216		176.69	2.04715		185.904	0.30917
186.54	0.59432		189.913	0.04158		176.851	2.05037		186.135	0.30814
186.771	0.59448		190.125	0.04104		177.063	2.06493		186.366	0.30705
186.934	0.59457		190.339	0.04043		177.274	2.06712		186.525	0.3059
187.095	0.5947		190.561	0.03975		177.486	2.07034		186.737	0.30463
187.307	0.59485		190.791	0.0391		177.706	2.07253		186.956	0.30348
187.518	0.59497		191.024	0.03841		177.937	2.07402		187.187	0.30231
187.731	0.59512		191.255	0.03784		178.168	2.0758		187.418	0.30128
187.95	0.5953		191.416	0.03714		178.327	2.07761		187.649	0.3001
188.182	0.59546		191.629	0.03649		178.538	2.07964		187.88	0.29898
188.412	0.59563		191.844	0.03594		178.758	2.08108		188.113	0.29792
188.643	0.59577		192.075	0.03553		178.989	2.08265		188.345	0.29683
188.874	0.59585		192.306	0.03505		179.22	2.08452		188.574	0.29592
189.105	0.59601		192.538	0.0345		179.451	2.08686		188.805	0.29513
189.336	0.59621		192.768	0.03393		179.611	2.08922		188.966	0.29426
189.576	0.59633		192.999	0.03324		179.821	2.09052		189.179	0.29334
189.798	0.59649		193.23	0.03257		180.041	2.09173		189.396	0.29245
190.029	0.5967		193.461	0.0322		180.272	2.09318		189.555	0.29142
190.26	0.59689		193.692	0.03157		180.432	2.0957		189.767	0.29034
190.49	0.59698		193.922	0.03107		180.592	2.09747		189.985	0.28918
190.721	0.59731		194.154	0.03032		180.805	2.09944		190.216	0.28804
190.953	0.59766		194.387	0.02975		181.02	2.10176		190.447	0.28692
191.184	0.59803		194.616	0.02915		181.181	2.10318		190.608	0.28569
191.415	0.59869		194.847	0.02851		181.396	2.10434		190.819	0.28457
191.647	0.59909		195.078	0.02786		181.605	2.10627		191.037	0.28349
191.878	0.5993		195.309	0.0273		181.765	2.10851		191.268	0.28241
192.109	0.59947		195.54	0.02659		181.977	2.1113		191.499	0.28128
192.34	0.59957		195.772	0.02603		182.19	2.11216		191.732	0.28021
192.571	0.59965		196.003	0.02544		182.404	2.11383		191.961	0.27897
192.808	0.59966		196.232	0.0248		182.565	2.11504		192.192	0.27784
193.032	0.59972		196.463	0.02416		182.724	2.11723		192.423	0.27674
193.264	0.59976		196.695	0.02355		182.937	2.11846		192.654	0.27568
193.498	0.59987		196.926	0.023		183.15	2.1193		192.815	0.27451
193.726	0.6		197.157	0.02242		183.361	2.12015		193.025	0.27336
193.958	0.6003		197.39	0.0218		183.58	2.12202		193.245	0.2723
194.188	0.60046		197.619	0.02114		183.74	2.12409		193.474	0.27118
194.349	0.60061		197.781	0.02054		183.952	2.12575		193.706	0.2701
194.51	0.6007		197.994	0.01987		184.17	2.12738		193.936	0.26897
194.722	0.60079		198.208	0.01928		184.401	2.12833		194.097	0.26786
194.933	0.60089		198.441	0.0187		184.632	2.12951		194.306	0.26692
195.144	0.60102		198.604	0.01813		184.863	2.13064		194.466	0.26593
195.367	0.60119		198.814	0.01757		185.094	2.13211		194.677	0.26522
195.598	0.60126		199.028	0.01698		185.254	2.13369		194.888	0.26426
195.83	0.60145		199.213	0.01632		185.414	2.13475		195.047	0.26351
196.06	0.60161		199.426	0.01569		185.625	2.13593		195.206	0.26263
196.25	0.60173		199.638	0.01506		185.837	2.1365		195.418	0.26172
196.462	0.60191		199.849	0.01463		186.049	2.13804		195.63	0.26059
196.673	0.60208		200.079	0.01407		186.208	2.13967		195.841	0.25953
196.886	0.60224		200.31	0.01362		186.398	2.14176		196.065	0.25843
197.109	0.60231		200.541	0.013		186.581	2.14292		196.296	0.25739
197.341	0.60247		200.774	0.01249		186.791	2.14381		196.527	0.25632
197.571	0.60255		201.004	0.01196		187.003	2.1458		196.758	0.25536
197.809	0.60276		201.234	0.01142		187.162	2.14693		196.989	0.25434
198.032	0.60302		201.465	0.01083		187.375	2.14761		197.22	0.25345
198.266	0.60346		201.696	0.01025		187.587	2.14938		197.451	0.25251
198.494	0.60321		201.928	0.0097		187.811	2.15057		197.682	0.25144
198.725	0.60336		202.161	0.0091		188.041	2.1518		197.914	0.25046
198.958	0.6035		202.392	0.00861		188.272	2.15256		198.144	0.24935
199.187	0.60366		202.622	0.00811		188.503	2.15377		198.374	0.24831
199.418	0.60378		202.855	0.00758		188.734	2.15507		198.605	0.2473
199.65	0.60398		203.082	0.00722		188.965	2.15684		198.836	0.24633
199.882	0.60407		205.31	0.00386		189.197	2.15995		199.067	0.24524
200.112	0.60423		206.493	0.0015		189.428	2.16169		199.298	0.24424
200.343	0.60428		208.726	0.000420754		189.657	2.16405		199.53	0.24325
200.573	0.60433		208.957	0.000399717		189.889	2.16574		199.761	0.24222
200.804	0.60454		209.188	0.000385692		190.119	2.16686		199.991	0.24124
201.035	0.60474		209.349	0.000385692		190.35	2.16837		200.149	0.24026
201.267	0.60483		209.562	0.000385692		190.582	2.16971		200.36	0.2393
201.501	0.605		209.779	0.000385692		190.816	2.16995		200.58	0.23835
201.729	0.60522		210.008	0.000392704		191.044	2.17093		200.813	0.23767
201.96	0.6054		210.239	0.000371666		191.274	2.172		201.041	0.23652
202.19	0.60547		210.47	0.000364654		191.504	2.17319		201.272	0.23556
202.421	0.60558		210.701	0.000371666		191.664	2.17487		201.503	0.23453
202.595	0.60575		210.932	0.000371666		191.824	2.1762		201.734	0.2335
202.808	0.60581		211.163	0.000378679		192.037	2.17749		201.966	0.2325
203.023	0.60591		211.324	0.000378679		192.249	2.17893		202.196	0.23161
203.241	0.60608		211.535	0.000378679		192.459	2.17917		202.428	0.23076
203.473	0.60615		211.697	0.000399717		192.684	2.18072		202.588	0.22998
203.703	0.60633		211.91	0.000399717		192.915	2.18217		202.801	0.22916
203.934	0.60659		212.121	0.000392704		193.148	2.18272		203.017	0.22843
204.165	0.60668		212.288	0.000385692		193.379	2.18396		203.248	0.22758
204.398	0.60673		212.498	0.000399717		193.609	2.18577		203.48	0.22681
204.627	0.60689		212.711	0.000392704		193.839	2.18686		203.712	0.22599
204.858	0.6071		212.931	0.000399717		194.071	2.1881		203.942	0.22516
205.089	0.60732		213.162	0.000392704		194.302	2.18937		204.172	0.22419
205.321	0.60746		213.393	0.000385692		194.532	2.19081		204.403	0.22325
205.551	0.60781		213.624	0.000378679		194.765	2.19262		204.634	0.22226
205.782	0.60782		213.856	0.000364654		194.996	2.19375		204.865	0.22133
206.013	0.60783		214.088	0.000364654		195.155	2.19538		205.024	0.22073
206.244	0.60781		214.32	0.000371666		195.318	2.19667		205.235	0.21978
206.475	0.60782		214.548	0.000378679		195.528	2.1982		205.455	0.21891
206.706	0.60781		214.779	0.000378679		195.74	2.19947		205.691	0.21793
206.938	0.60781		215.01	0.000392704		195.902	2.20045		205.918	0.21701
207.169	0.60781		215.241	0.000392704		196.112	2.20206		206.083	0.21607
207.402	0.60782		215.472	0.000420754		196.323	2.20309		206.243	0.21505
207.631	0.60781		215.703	0.00043478		196.483	2.20372		206.452	0.21405
207.861	0.60781		215.935	0.000448805		196.693	2.20548		206.669	0.21301
208.092	0.60783		216.166	0.00046283		196.904	2.20725		206.881	0.21206
208.322	0.60781		216.33	0.00046283		197.064	2.20825		207.098	0.21154
208.553	0.6078		216.525	0.000448805		197.274	2.20939		207.329	0.21091
208.788	0.60781		216.684	0.00046283		197.434	2.21059		207.561	0.21014
209.015	0.60782		216.845	0.000469842		197.645	2.21189		207.79	0.20942
209.251	0.60782		217.058	0.000483868		197.804	2.21292		207.95	0.20865
209.478	0.60783		217.272	0.000483868		198.015	2.21479		208.109	0.20775
209.709	0.60783		217.485	0.000469842		198.227	2.2163		208.324	0.20685
209.883	0.60783		217.708	0.00046283		198.438	2.21728		208.534	0.20602
210.093	0.60783		217.939	0.000483868		198.665	2.21799		208.695	0.20519
210.304	0.60783		218.167	0.000406729		198.896	2.2197		208.905	0.20423
210.529	0.60783		218.398	0.000406729		199.123	2.22156		209.064	0.20329
210.76	0.60783		218.629	0.000413742		199.354	2.22333		209.278	0.20243
210.993	0.60783		218.86	0.000420754		199.585	2.22453		209.486	0.20159
211.222	0.60783		219.091	0.000441792		199.748	2.22549		209.698	0.2007
211.453	0.60785		219.322	0.00043478		199.909	2.22649		209.857	0.20008
211.684	0.60784		219.553	0.000413742		200.122	2.22823		210.068	0.19924
211.916	0.60784		219.784	0.000399717		200.335	2.23158		210.279	0.19846
212.146	0.60783		219.945	0.000420754		200.546	2.23329		210.44	0.19761
212.377	0.60782		220.143	0.000420754		200.765	2.23356		210.6	0.19679
212.608	0.60782		220.374	0.000427767		200.996	2.23501		210.81	0.19596
212.839	0.60783		220.607	0.00043478		201.228	2.23657		211.021	0.19511
213.07	0.60783		220.836	0.000420754		201.458	2.23865		211.232	0.19428
213.301	0.60784		220.999	0.00043478		201.618	2.24104		211.455	0.19348
213.532	0.60784		221.193	0.000441792		201.83	2.245		211.687	0.19265
213.763	0.60784		221.425	0.000420754		201.99	2.24947		211.917	0.19205
213.994	0.60784		221.66	0.000427767		202.201	2.25093		212.076	0.19134
214.225	0.60785		221.887	0.000413742		202.413	2.25166		212.235	0.19047
214.456	0.60785		222.118	0.000371666		202.637	2.25344		212.448	0.18961
214.687	0.60784		222.279	0.000371666		202.868	2.25552		212.672	0.18876
214.918	0.60784		222.491	0.000357641		203.099	2.25684		212.881	0.18794
215.151	0.60783		222.71	0.000371666		203.332	2.25753		213.097	0.18712
215.384	0.60783		222.94	0.000364654		203.563	2.25898		213.328	0.18631
215.611	0.60783		223.17	0.000364654		203.722	2.25995		213.559	0.18548
215.842	0.60782		223.4	0.000357641		203.883	2.26155		213.79	0.18458
216.073	0.60781		223.631	0.000364654		204.094	2.2633		214.021	0.18379
216.304	0.60782		223.862	0.000336604		204.306	2.2645		214.252	0.18295
216.534	0.60781		224.093	0.000301541		204.518	2.26516		214.483	0.18208
216.766	0.6078		224.323	0.000308553		204.74	2.26701		214.642	0.18132
216.998	0.60781		224.488	0.000315566		204.901	2.26793		214.803	0.18053
217.228	0.60781		224.699	0.000336604		205.112	2.26848		215.014	0.17973
217.458	0.60782		224.913	0.000329591		205.272	2.2703		215.245	0.17893
217.689	0.60781		225.145	0.000336604		205.485	2.27106		215.458	0.17811
217.92	0.60781		225.375	0.000329591		205.696	2.27136		215.669	0.17728
218.151	0.60781		225.608	0.000322578		205.919	2.27223		215.829	0.17655
218.384	0.60784		225.839	0.000329591		206.15	2.27359		216.039	0.17601
218.613	0.60784		226.068	0.000336604		206.381	2.278		216.198	0.17538
218.844	0.6078		226.229	0.000336604		206.541	2.28094		216.41	0.17463
219.075	0.6078		226.44	0.000336604		206.701	2.28388		216.62	0.17399
219.308	0.60781		226.658	0.000350629		206.914	2.28366		216.839	0.17327
219.536	0.60779		226.889	0.000343616		207.128	2.28394		217.07	0.17272
219.767	0.60778		227.05	0.000350629		207.287	2.28477		217.302	0.17207
219.998	0.60778		227.262	0.000350629		207.499	2.28486		217.533	0.17134
220.229	0.60778		227.48	0.000336604		207.711	2.28563		217.764	0.17077
220.46	0.60778		227.71	0.000322578		207.872	2.2864		217.995	0.17003
220.691	0.6078		227.942	0.000322578		208.085	2.28811		218.226	0.16929
220.922	0.60781		228.172	0.000322578		208.298	2.28827		218.457	0.16849
221.153	0.60782		228.404	0.000329591		208.509	2.28977		218.619	0.16766
221.384	0.60781		228.635	0.000322578		208.67	2.29034		218.83	0.16687
221.616	0.60783		228.865	0.000315566		208.83	2.2906		219.051	0.16608
221.846	0.60783		229.096	0.000259465		209.041	2.29252		219.279	0.16529
222.077	0.60783		229.258	0.000259465		209.253	2.29391		219.509	0.16448
222.308	0.60783		229.471	0.000259465		209.417	2.29373		219.74	0.16375
222.539	0.60783		229.631	0.00024544		209.627	2.29385		219.971	0.16295
222.77	0.60784		229.844	0.000238428		209.839	2.29449		220.202	0.16216
223.001	0.60784		230.057	0.00024544		209.999	2.29484		220.432	0.1613
223.232	0.60784		230.275	0.000231415		210.211	2.29555		220.668	0.16051
223.463	0.60785		230.449	0.000224402		210.421	2.29635		220.872	0.15973
223.694	0.60785		230.663	0.000231415		210.636	2.29766		221.086	0.15914
223.924	0.60785		230.874	0.000224402		210.796	2.29773		221.298	0.1585
224.156	0.60783		231.095	0.000238428		210.956	2.29783		221.514	0.15761
224.387	0.60782		231.326	0.000252453		211.168	2.29821		221.722	0.15697
224.618	0.60783		231.557	0.000259465		211.379	2.29927		221.95	0.15627
224.849	0.60781		231.789	0.00024544		211.59	2.30086		222.175	0.15551
225.08	0.60782		231.949	0.000252453		211.815	2.30184		222.406	0.15473
225.311	0.60783		232.16	0.000238428		212.046	2.3026		222.637	0.15401
225.542	0.60784		232.378	0.00024544		212.207	2.30387		222.868	0.15316
225.773	0.60783		232.609	0.000252453		212.42	2.30479		223.1	0.15233
226.004	0.60783		232.84	0.000252453		212.581	2.30554		223.331	0.1515
226.235	0.60783		233.073	0.000252453		212.792	2.30608		223.564	0.15076
226.466	0.60783		233.305	0.000231415		212.953	2.30709		223.795	0.15024
226.697	0.60782		233.534	0.000238428		213.164	2.3078		224.024	0.14958
226.928	0.60781		233.764	0.00024544		213.375	2.30882		224.255	0.14893
227.159	0.60782		233.995	0.000238428		213.537	2.30918		224.439	0.14831
227.39	0.60781		234.226	0.000224402		213.749	2.30976		224.649	0.14765
227.621	0.60781		234.457	0.00021739		213.96	2.31165		224.807	0.14701
227.852	0.60781		234.689	0.000224402		214.173	2.31148		225.018	0.14639
228.084	0.60781		234.921	0.000203365		214.405	2.31158		225.23	0.14577
228.315	0.60781		235.151	0.000210377		214.636	2.3135		225.44	0.14515
228.545	0.60781		235.313	0.000203365		214.797	2.31632		225.664	0.14455
228.776	0.60781		235.526	0.000196352		215.007	2.31685		225.895	0.1439
229.007	0.6078		235.741	0.000203365		215.167	2.31743		226.126	0.14323
229.238	0.60779		235.973	0.000203365		215.379	2.31834		226.357	0.14256
229.469	0.60779		236.204	0.000196352		215.539	2.31926		226.588	0.14181
229.701	0.60779		236.365	0.000196352		215.751	2.32005		226.819	0.14096
229.931	0.60779		236.576	0.000189339		215.965	2.32045		227.069	0.14019
230.092	0.60779		236.793	0.000175314		216.124	2.32068		227.28	0.13945
230.304	0.6078		237.024	0.000182327		216.335	2.32147		227.514	0.13873
230.521	0.60778		237.257	0.000168302		216.496	2.32264		227.681	0.13797
230.752	0.60779		237.488	0.000168302		216.709	2.32376		227.9	0.1372
230.983	0.60779		237.717	0.000175314		216.922	2.32477		228.063	0.13641
231.215	0.6078		237.948	0.000175314		217.136	2.3253		228.284	0.13566
231.445	0.60779		238.179	0.000161289		217.354	2.32536		228.496	0.13498
231.676	0.6078		238.41	0.000168302		217.585	2.3259		228.655	0.13427
231.907	0.60779		238.641	0.000168302		217.744	2.32635		228.867	0.13353
232.138	0.6078		238.873	0.000161289		217.957	2.3261		229.082	0.1328
232.369	0.6078		239.105	0.000175314		218.175	2.32654		229.295	0.13206
232.601	0.6078		239.334	0.000182327		218.406	2.32691		229.455	0.13157
232.832	0.6078		239.565	0.000175314		218.636	2.32712		229.667	0.13092
233.062	0.60778		239.796	0.000182327		218.868	2.32764		229.83	0.1303
233.293	0.60779		240.027	0.000175314		219.099	2.32907		230.047	0.12959
233.524	0.60779		240.259	0.000168302		219.258	2.33016		230.284	0.12891
233.755	0.60777		240.49	0.000161289		219.47	2.33072		230.477	0.12816
233.986	0.60779		240.72	0.000182327		219.689	2.3323		230.688	0.12762
234.217	0.60778		240.954	0.000175314		219.92	2.33335		230.848	0.12698
234.448	0.60778		241.182	0.000182327		220.151	2.33343		231.061	0.12647
234.613	0.60778		241.413	0.000175314		220.383	2.33372		231.223	0.12591
234.825	0.60778		241.644	0.000189339		220.614	2.33526		231.431	0.12523
235.038	0.60778		241.875	0.000168302		220.774	2.33489		231.594	0.12451
235.269	0.60774		242.107	0.000182327		220.987	2.3347		231.803	0.12381
235.435	0.60776		242.338	0.000175314		221.202	2.33688		232.014	0.1231
235.646	0.60778		242.499	0.000189339		221.434	2.33886		232.233	0.12236
235.859	0.60777		242.711	0.000196352		221.665	2.34017		232.456	0.12182
236.09	0.60778		242.928	0.000182327		221.897	2.34088		232.621	0.12138
236.321	0.60774		243.159	0.000182327		222.063	2.34237		232.813	0.12077
236.552	0.60771		243.39	0.000182327		222.274	2.34282		232.999	0.12004
236.784	0.60769		243.624	0.000182327		222.487	2.34442		233.21	0.11932
237.015	0.60777		243.852	0.000161289		222.716	2.34487		233.42	0.11861
237.245	0.60771		244.082	0.000175314		222.947	2.34521		233.581	0.11785
237.476	0.60776		244.314	0.000168302		223.106	2.34538		233.791	0.11738
237.707	0.60775		244.544	0.000161289		223.318	2.34615		234.002	0.1167
237.938	0.6077		244.774	0.000161289		223.537	2.3558		234.163	0.11606
238.169	0.60771		245.006	0.000140251		223.699	2.3618		234.373	0.11533
238.402	0.60769		245.238	0.000147264		223.911	2.36749		234.586	0.11463
238.631	0.60777		245.471	0.000126226		224.128	2.37005		234.815	0.11404
238.862	0.60776		245.699	0.000140251		224.358	2.37312		235.047	0.11339
239.093	0.60776		245.93	0.000112201		224.519	2.37552		235.278	0.11267
239.325	0.60769		246.161	0.000112201		224.73	2.37674		235.507	0.11195
239.556	0.60775		246.392	0.000112201		224.948	2.3775		235.668	0.11121
239.785	0.6077		246.623	0.000112201		225.109	2.3783		235.829	0.11051
239.95	0.60776		246.854	0.000112201		225.321	2.37876		236.038	0.10998
240.161	0.60774		247.088	9.11635e-05		225.539	2.38106		236.25	0.10934
240.375	0.60775		247.316	9.11635e-05		225.698	2.38258		236.464	0.10868
240.606	0.60771		247.478	7.71383e-05		225.909	2.38421		236.687	0.10822
240.782	0.60772		247.691	8.41509e-05		226.129	2.3849		236.918	0.10756
240.993	0.60776		247.906	7.01257e-05		226.361	2.38581		237.149	0.10688
241.205	0.60776		248.137	5.61006e-05		226.591	2.38668		237.38	0.10617
241.426	0.60776		248.371	4.9088e-05		226.822	2.38767		237.54	0.10546
241.657	0.60778		248.599	5.61006e-05		226.974	2.38827		237.752	0.10502
241.888	0.60778		248.83	6.31132e-05		227.205	2.3892		237.97	0.10433
242.119	0.60773		249.061	7.01257e-05		227.436	2.38915		238.201	0.10369
242.35	0.60771		249.292	7.01257e-05		227.669	2.38939		238.366	0.10299
242.581	0.60775		249.523	7.71383e-05		227.9	2.39016		238.557	0.10235
242.812	0.60776		249.756	7.01257e-05		228.129	2.39076		238.791	0.10163
243.043	0.60778		249.918	6.31132e-05		228.36	2.39321		239.022	0.10099
243.274	0.60781		250.13	6.31132e-05		228.591	2.39254		239.181	0.10031
243.505	0.60781		250.344	6.31132e-05		228.822	2.39295		239.34	0.09958
243.736	0.60778		250.574	4.20754e-05		229.054	2.39372		239.551	0.0988
243.967	0.60775		250.807	4.20754e-05		229.287	2.39445		239.771	0.0983
244.199	0.60776		251.037	3.50629e-05		229.515	2.39559		239.983	0.09769
244.43	0.60776		251.198	3.50629e-05		229.746	2.3956		240.202	0.09704
244.661	0.60775		251.411	3.50629e-05		229.977	2.39474		240.364	0.09633
244.892	0.60776		251.627	4.20754e-05		230.208	2.39576		240.574	0.09567
245.123	0.60778		251.858	2.80503e-05		230.439	2.396		240.792	0.09498
245.354	0.60778		252.091	3.50629e-05		230.621	2.39681		241.022	0.09457
245.585	0.60777		252.322	4.20754e-05		230.832	2.39732		241.181	0.09394
245.816	0.60777		252.551	4.20754e-05		231.044	2.39667		241.397	0.09343
246.047	0.60776		252.786	4.9088e-05		231.259	2.39668		241.613	0.0929
246.278	0.60776		253.014	4.9088e-05		231.49	2.39741		241.773	0.09229
246.509	0.60777		253.245	4.20754e-05		231.722	2.39763		241.986	0.09189
246.74	0.60776		253.476	2.80503e-05		231.953	2.39783		242.203	0.09138
246.971	0.60776		253.706	2.10377e-05		232.185	2.39763		242.434	0.09074
247.202	0.60775		253.94	2.80503e-05		232.413	2.397		242.593	0.09026
247.433	0.60776		254.175	2.80503e-05		232.644	2.39683		242.754	0.08964
247.665	0.60778		254.4	1.40251e-05		232.875	2.39725		242.966	0.089
247.895	0.6078		254.631	2.10377e-05		233.106	2.39711		243.18	0.08837
248.126	0.60781		254.862	2.10377e-05		233.338	2.39776		243.39	0.08774
248.357	0.60779		255.093	2.80503e-05		233.568	2.39708		243.553	0.08703
248.588	0.60779		255.323	2.10377e-05		233.799	2.39723		243.764	0.08621
248.819	0.60778		255.558	-7.01257e-06		234.03	2.39896		243.924	0.08551
249.05	0.60778		255.787	7.01257e-06		234.261	2.39787		244.137	0.08488
249.281	0.60778		256.017	7.01257e-06		234.492	2.39729		244.349	0.08416
249.512	0.60777		256.248	1.40251e-05		234.724	2.40037		244.564	0.08354
249.743	0.60776		256.479	2.10377e-05		234.954	2.40078		244.796	0.08289
249.974	0.60774		256.709	2.80503e-05		235.184	2.39987		245.024	0.08226
250.205	0.60776		256.94	4.20754e-05		235.417	2.39936		245.255	0.08165
250.436	0.60779		257.174	3.50629e-05		235.649	2.40073		245.486	0.08104
250.667	0.60777		257.406	4.9088e-05		235.878	2.40027		245.716	0.08043
250.85	0.60777		257.634	7.01257e-05		236.109	2.40126		245.949	0.07982
251.061	0.60773		257.809	5.61006e-05		236.34	2.40202		246.182	0.0792
251.273	0.60771		258.019	4.20754e-05		236.571	2.40233		246.409	0.07856
251.487	0.60773		258.18	4.20754e-05		236.803	2.4027		246.64	0.07791
251.718	0.60774		258.394	6.31132e-05		237.033	2.40356		246.871	0.07743
251.949	0.60776		258.607	8.41509e-05		237.265	2.40385		247.102	0.07684
252.18	0.60774		258.821	5.61006e-05		237.496	2.40475		247.265	0.07624
252.411	0.60775		259.042	7.01257e-05		237.725	2.40593		247.475	0.07559
252.642	0.60775		259.273	6.31132e-05		237.956	2.40619		247.691	0.07495
252.803	0.60776		259.507	6.31132e-05		238.187	2.40586		247.852	0.07434
253.015	0.60775		259.736	7.01257e-05		238.418	2.4064		248.015	0.07368
253.232	0.60776		259.966	5.61006e-05		238.649	2.40684		248.229	0.07301
253.463	0.60778		260.128	5.61006e-05		238.88	2.40781		248.44	0.0723
253.694	0.60775		260.344	4.9088e-05		239.112	2.41093		248.653	0.07161
253.925	0.60776		260.556	4.20754e-05		239.34	2.4124		248.871	0.07098
254.156	0.60776		260.716	4.9088e-05		239.572	2.41361		249.102	0.07056
254.387	0.60777		260.927	5.61006e-05		239.803	2.41432		249.333	0.07
254.617	0.60779		261.147	4.20754e-05		240.034	2.41466		249.564	0.06937
254.849	0.6078		261.378	2.10377e-05		240.267	2.41541		249.795	0.06878
255.08	0.60781		261.609	2.80503e-05		240.496	2.41477		249.954	0.06818
255.311	0.60784		261.84	1.40251e-05		240.727	2.41537		250.167	0.06757
255.542	0.60782		262.003	1.40251e-05		240.958	2.41614		250.385	0.06679
255.773	0.60781		262.213	1.40251e-05		241.189	2.41632		250.62	0.06607
256.004	0.6078		262.38	2.80503e-05		241.419	2.41656		250.78	0.06544
256.234	0.60781		262.592	0		241.652	2.4176		250.94	0.06485
256.465	0.60781					241.882	2.41824		251.153	0.06423
256.696	0.60782					242.113	2.41849		251.365	0.06384
256.928	0.60782					242.344	2.41928		251.579	0.06328
257.159	0.60779					242.575	2.42162		251.795	0.06262
257.39	0.60778					242.806	2.42219		251.955	0.06195
257.62	0.60778					243.038	2.42306		252.169	0.06139
257.851	0.60779					243.268	2.42337		252.385	0.06094
258.082	0.60781					243.499	2.4263		252.563	0.06044
258.243	0.60781					243.731	2.42675		252.773	0.05992
258.455	0.60782					243.962	2.42733		252.986	0.05933
258.672	0.60781					244.193	2.42748		253.205	0.05873
258.903	0.60781					244.355	2.42698		253.436	0.05816
259.134	0.60781		4.3224	--		244.567	2.4273		253.667	0.05754
259.365	0.60781		4.3224	--		244.784	2.42732		253.897	0.05696
259.596	0.60782		4.3224	--		245.015	2.42721		254.13	0.05631
259.827	0.60781		4.3224	--		245.246	2.42826		254.361	0.05593
260.058	0.60779		4.3224	--		245.476	2.42891		254.52	0.05547
260.289	0.60778		4.3224	--		245.708	2.42929		254.732	0.05488
260.52	0.60778		4.3224	--		245.938	2.4303		254.95	0.05436
260.751	0.60778		4.3224	--		246.17	2.43009		255.115	0.05385
260.913	0.60776		4.3224	--		246.401	2.42958		255.325	0.05337
261.076	0.60778		4.3224	--		246.632	2.43081		255.539	0.05292
261.288	0.60777		4.3224	--		246.863	2.43205		255.771	0.05235
261.5	0.60775		4.3224	--		247.093	2.43171		256.002	0.05196
261.712	0.60774		4.3224	--		247.324	2.43131		256.233	0.05146
261.931	0.60774		4.3224	--		247.555	2.43316		256.465	0.051
262.162	0.60776		4.3224	--		247.786	2.43263		256.698	0.05054
262.393	0.60778		4.3224	--		248.018	2.43264		256.929	0.05005
262.624	0.60777		4.3224			248.249	2.43273		257.157	0.04964
262.855	0.60776		4.3224			248.479	2.43272		257.388	0.04921
263.086	0.60775		4.3224			248.71	2.433		257.619	0.04865
263.317	0.60775		4.3224			248.942	2.43389		257.849	0.04817
263.548	0.60774		4.3224			249.173	2.43501		258.081	0.04761
263.779	0.60774		4.3224			249.403	2.43476		258.24	0.04703
263.941	0.60775		4.3224			249.634	2.43468		258.399	0.04644
264.152	0.60775		4.3224			249.865	2.43498		258.613	0.04577
264.369	0.60774		4.3224			250.095	2.43452		258.822	0.04536
264.6	0.60774		4.3224			250.326	2.43503		258.984	0.0449
264.831	0.60774		4.3224			250.557	2.43497		259.199	0.04434
265.062	0.60772		4.3224			250.788	2.43443		259.413	0.04377
265.293	0.60776		4.3224			251.02	2.43423		259.623	0.04333
265.455	0.60778		4.3224			251.25	2.43454		259.849	0.04282
265.666	0.60777		4.3224			251.482	2.43439		260.083	0.04226
265.883	0.60777		4.3224			251.712	2.43509		260.314	0.04167
266.115	0.60776		4.3224			251.944	2.43575		260.542	0.04117
266.345	0.60777		4.3224			252.174	2.43615		260.773	0.0406
266.577	0.60778		4.3224			252.405	2.43681		261.004	0.04006
266.807	0.60777		4.3224			252.636	2.4374		261.235	0.03947
267.038	0.60775		4.3224			252.868	2.43771		261.466	0.03911
267.268	0.60775		4.3224			253.098	2.43797		261.698	0.03869
267.499	0.60776		4.3224			253.329	2.43845		261.931	0.03818
267.73	0.60776		4.3224			253.56	2.43842		262.162	0.0376
267.961	0.60774		4.3224			253.791	2.43959		262.33	0.03717
268.122	0.60774		4.3224			254.022	2.43948		262.542	0.03665
268.333	0.60774		4.3224			254.253	2.44001		262.754	0.03629
268.552	0.60774		4.3224			254.484	2.44075		262.981	0.03578
268.782	0.60774		4.3224			254.715	2.44149		263.213	0.03528
269.013	0.60774		4.3224			254.876	2.44162		263.442	0.03479
269.244	0.60774		4.3224			255.086	2.44225		263.672	0.03426
269.475	0.60774		4.3224			255.306	2.44303		263.903	0.03374
269.706	0.60774		4.3224			255.537	2.44384		264.134	0.03324
269.937	0.60776		4.3224			255.698	2.44387		264.365	0.03266
270.168	0.60775		4.3224			255.909	2.44406		264.524	0.0321
270.399	0.60776		4.3224			256.127	2.44467		264.736	0.03151
270.63	0.60776		4.3224			256.358	2.44482		264.898	0.03096
270.807	0.60777		4.3224			256.59	2.44485		265.106	0.03043
271.018	0.60776		4.3224			256.819	2.44546		265.317	0.02983
271.229	0.60776		4.3224			257.051	2.44611		265.548	0.02943
271.45	0.60776		4.3224			257.281	2.44566		265.779	0.02896
271.681	0.60778		4.3224			257.512	2.44743		266.007	0.0284
271.912	0.60777		4.3224			257.742	2.44823		266.238	0.02787
272.143	0.60777		4.3224			257.919	2.44938		266.469	0.02736
272.374	0.60777		4.3224			258.132	2.44986		266.7	0.02678
272.604	0.60778		4.3224			258.342	2.45057		266.931	0.02621
272.835	0.6078		4.3224			258.563	2.4504		267.164	0.02566
273.066	0.60781		4.3224			258.794	2.45004		267.395	0.02514
4.3224	--		4.3224			259.025	2.4501		267.623	0.02454
4.3224	--		4.3224			259.256	2.45082		267.785	0.02404
4.3224	--		4.3224			259.487	2.45243		267.999	0.0236
4.3224	--		4.3224			259.719	2.45159		268.159	0.02314
4.3224	--		4.3224			259.95	2.45267		268.371	0.0227
4.3224	--		4.3224			260.18	2.45314		268.586	0.02217
4.3224	--		4.3224			260.412	2.45388		268.747	0.02165
4.3224	--		4.3224			260.643	2.45498		268.957	0.02117
4.3224	--		4.3224			260.874	2.45578		269.164	0.02063
4.3224	--		4.3224			261.105	2.4575		269.395	0.02018
4.3224	--		4.3224			261.336	2.45858		269.623	0.01963
4.3224	--		4.3224			261.567	2.45898		269.784	0.01907
4.3224	--		4.3224			261.798	2.45992		269.997	0.01855
4.3224	--		4.3224			262.029	2.46024		270.156	0.01804
4.3224	--		4.3224			262.26	2.461		270.368	0.01753
4.3224	--		4.3224			262.491	2.46123		270.58	0.01702
4.3224	--		4.3224			262.722	2.46142		270.803	0.01652
4.3224	--		4.3224			262.953	2.4624		271.034	0.01604
4.3224	--		4.3224			263.186	2.46285		271.265	0.01559
4.3224	--		4.3224			263.415	2.46296		271.497	0.01514
4.3224	--		4.3224			263.646	2.46475		271.734	0.01467
4.3224	--		4.3224			263.877	2.46461		271.958	0.01428
4.3224	--		4.3224			264.108	2.46514		272.118	0.01379
4.3224	--		4.3224			264.338	2.46528		272.277	0.01328
4.3224	--		4.3224			264.57	2.4657		272.488	0.01263
4.3224	--		4.3224			264.801	2.46651		272.702	0.01209
4.3224	--		4.3224			265.032	2.46649		272.913	0.01153
4.3224	--		4.3224			265.263	2.46921		273.136	0.01104
4.3224	--		4.3224			265.494	2.4709		273.368	0.01053
4.3224	--		4.3224			265.725	2.47236		273.599	0.00999
			4.3224			265.956	2.47296		273.83	0.00947
			4.3224			266.187	2.47377		274.061	0.00892
			4.3224			266.418	2.47453		274.252	0.00857
			4.3224			266.649	2.47398		274.462	0.00811
			4.3224			266.88	2.47301		274.676	0.00772
			4.3224			267.111	2.4737		274.881	0.00717
			4.3224			267.342	2.47369		275.112	0.00672
			4.3224			267.573	2.47364		275.35	0.00629
			4.3224			267.804	2.47334		275.522	0.00574
			4.3224			268.035	2.47337		275.74	0.00528
			4.3224			268.266	2.47392		275.939	0.0048
			4.3224			268.497	2.47419		276.2	0.00445
			4.3224			268.728	2.47489		276.396	0.00406
			4.3224			268.895	2.4742		276.557	0.00366
			4.3224			269.106	2.47434		276.756	0.00313
			4.3224			269.321	2.47445		276.986	0.00261
			4.3224			269.547	2.47417		277.216	0.00227
			4.3224			269.778	2.47381		277.447	0.00174
			4.3224			270.009	2.47367		277.61	0.00138
			4.3224			270.24	2.47382		277.769	0.000901886
			4.3224			270.471	2.47385		277.98	0.000501048
			4.3224			270.702	2.47417		278.191	0.000143779
			4.3224			270.933	2.47405		278.403	9.58526e-05
			4.3224			271.164	2.47395		278.628	9.58526e-05
			4.3224			271.395	2.47411		278.858	8.71388e-05
			4.3224			271.626	2.47394		279.089	9.14957e-05
			4.3224			271.857	2.47442		279.32	7.84249e-05
			4.3224			272.088	2.47381		279.483	8.71388e-05
			4.3224			272.32	2.47284		279.694	7.84249e-05
			4.3224			272.55	2.47286		279.909	7.84249e-05
			4.3224			272.781	2.47354		280.074	7.40679e-05
			4.3224			273.012	2.47373		280.288	6.9711e-05
			4.3224			273.243	2.4737		280.507	8.27818e-05
			4.3224			273.474	2.47345		280.73	7.84249e-05
			4.3224			273.705	2.47547		280.894	6.09971e-05
			4.3224			273.936	2.47548		281.056	6.53541e-05
			4.3224			274.167	2.47547		281.267	5.66402e-05
			4.3224			274.398	2.47547		281.481	4.79263e-05
			4.3224			274.628	2.47548		281.692	3.92124e-05
			4.3224			274.859	2.47547		281.91	3.92124e-05
			4.3224			275.09	2.47547		282.07	4.79263e-05
			4.3224			275.321	2.47546		282.232	3.04986e-05
			4.3224			275.552	2.47546		282.447	3.92124e-05
			4.3224			275.784	2.47546		282.656	3.48555e-05
			4.3224			276.015	2.47546		282.815	4.35694e-05
			4.3224			276.245	2.47547		283.028	3.48555e-05
			4.3224			276.476	2.47547		283.239	3.48555e-05
			4.3224			276.707	2.47546		283.451	3.48555e-05
			4.3224			276.938	2.47547		283.679	2.61416e-05
			4.3224			277.108	2.47546		283.851	8.71388e-06
			4.3224			277.322	2.47545		284.068	1.30708e-05
			4.3224			277.533	2.47545		284.229	1.74278e-05
			4.3224			277.758	2.47544		284.44	8.71388e-06
			4.3224			277.99	2.47544		284.652	4.35694e-06
			4.3224			278.221	2.47544		284.885	8.71388e-06
			4.3224			278.452	2.47543		285.096	4.35694e-06
			4.3224			278.683	2.47543		285.319	-4.35694e-06
			4.3224			278.914	2.47542		285.549	-1.30708e-05
			4.3224			279.145	2.47541		285.782	-1.74278e-05
			4.3224			279.376	2.47541		286.015	-1.74278e-05
			4.3224			279.607	2.47542		286.246	-1.74278e-05
			4.3224			279.838	2.47542		286.474	-1.74278e-05
			4.3224			280.069	2.47542		286.705	-2.17847e-05
			4.3224			280.301	2.47542		286.878	-2.61416e-05
			4.3224			280.531	2.47542		287.088	-1.74278e-05
			4.3224			280.762	2.47542		287.252	8.71388e-06
			4.3224			280.993	2.47542		287.463	-4.35694e-06
			4.3224			281.224	2.47541		287.674	0
			4.3224			281.455	2.47541		287.836	0
			4.3224			281.687	2.47541		288.048	-1.30708e-05
			4.3224			281.917	2.47541		288.207	-2.61416e-05
			4.3224			282.149	2.47542		288.419	-2.61416e-05
			4.3224			282.379	2.47542		288.634	-2.17847e-05
			4.3224			282.61	2.47542		288.846	-4.35694e-05
			4.3224			282.841	2.47541		289.063	-5.22833e-05
			4.3224			283.073	2.4754		289.223	-5.22833e-05
			4.3224			283.303	2.4754		289.436	-6.53541e-05
			4.3224			283.484	2.4754		289.653	-6.9711e-05
			4.3224			283.696	2.4754		289.884	-7.40679e-05
			4.3224			283.906	2.47539		290.116	-7.40679e-05
			4.3224			284.123	2.47538		290.276	-7.84249e-05
			4.3224			284.354	2.47538		290.436	-7.40679e-05
			4.3224			284.585	2.47537		290.648	-7.40679e-05
			4.3224			284.817	2.47539		290.862	-7.84249e-05
			4.3224			285.047	2.47538		291.072	-7.84249e-05
			4.3224			285.278	2.47538		291.24	-8.27818e-05
			4.3224			285.509	2.47538		291.453	-8.71388e-05
			4.3224			285.74	2.47538		291.665	-7.84249e-05
			4.3224			285.971	2.47538		291.824	-8.71388e-05
			4.3224			286.202	2.47538		292.036	-8.71388e-05
			4.3224			286.433	2.47538		292.247	-9.14957e-05
			4.3224			286.666	2.47538		292.473	-9.58526e-05
			4.3224			286.896	2.47539		292.704	-8.71388e-05
			4.3224			287.127	2.4754		292.935	-7.40679e-05
			4.3224			287.358	2.47539		293.101	-7.40679e-05
			4.3224			287.589	2.47538		293.262	-8.71388e-05
			4.3224			287.82	2.47539		293.471	-0.000104567
			4.3224			288.051	2.4754		293.682	-0.000108923
			4.3224			288.283	2.4754		293.894	-0.000108923
			4.3224			288.513	2.47539		294.115	-0.000108923
			4.3224			288.744	2.47538		294.353	-0.00011328
			4.3224			288.975	2.47538		294.58	-0.000117637
			4.3224			289.206	2.47538		294.809	-0.000108923
			4.3224			289.437	2.47539		294.973	-0.000108923
			4.3224			289.668	2.47538		295.188	-0.00011328
			4.3224			289.904	2.47538		295.395	-0.00011328
			4.3224			290.13	2.47538		295.568	-0.000104567
			4.3224			290.361	2.47538		295.787	-0.000108923
			4.3224			290.592	2.47538		295.999	-0.000108923
			4.3224			290.823	2.47538		296.217	-0.000104567
			4.3224			291.054	2.47539		296.448	-0.00010021
			4.3224			291.285	2.47539		296.607	-0.000104567
			4.3224			291.516	2.47539		296.768	-0.00010021
			4.3224			291.747	2.4754		296.98	-9.14957e-05
			4.3224			291.978	2.47541		297.191	-8.71388e-05
			4.3224			292.209	2.47541		297.401	-9.14957e-05
			4.3224			292.44	2.47541		297.629	-9.14957e-05
			4.3224			292.671	2.4754		297.858	-8.71388e-05
			4.3224			292.834	2.47541		298.089	-0.00010021
			4.3224			293.045	2.47542		298.32	-0.00010021
			4.3224			293.261	2.47543		298.551	-0.00010021
			4.3224			293.493	2.47543		298.712	-8.27818e-05
			4.3224			293.723	2.47543		298.923	-7.84249e-05
			4.3224			293.954	2.47544		299.141	-8.71388e-05
			4.3224			294.185	2.47542		299.372	-8.27818e-05
			4.3224			294.417	2.47544		299.531	-8.71388e-05
			4.3224			294.648	2.47544		299.69	-7.84249e-05
			4.3224			294.877	2.47542		299.903	-8.27818e-05
			4.3224			295.108	2.47542		300.114	-8.27818e-05
			4.3224			295.341	2.47542		300.325	-8.71388e-05
			4.3224			295.57	2.47542		300.551	-8.27818e-05
			4.3224			295.802	2.47542		300.782	-9.58526e-05
			4.3224			296.033	2.47542		300.941	-8.71388e-05
			4.3224			296.264	2.47542		301.154	-8.27818e-05
			4.3224			296.496	2.47542		301.372	-8.27818e-05
			4.3224			296.726	2.47541		301.532	-8.71388e-05
			4.3224			296.956	2.47542		301.746	-7.84249e-05
			4.3224			297.187	2.47541		301.964	-8.27818e-05
			4.3224			297.419	2.4754		302.197	-6.53541e-05
			4.3224			297.649	2.47539		302.424	-5.66402e-05
			4.3224			297.88	2.47538		302.655	-4.35694e-05
			4.3224			298.111	2.47539		302.886	-3.92124e-05
			4.3224			298.342	2.47539		303.048	-4.35694e-05
			4.3224			298.573	2.47539		303.259	-3.92124e-05
			4.3224			298.804	2.47538		303.49	-2.61416e-05
			4.3224			299.035	2.47539		303.669	-1.30708e-05
			4.3224			299.266	2.47539		303.881	-8.71388e-06
			4.3224			299.427	2.47537		304.093	-2.61416e-05
			4.3224			299.64	2.47537		304.31	-3.04986e-05
			4.3224			299.856	2.47537		304.471	-3.04986e-05
			4.3224			300.087	2.47537		304.682	-4.35694e-05
			4.3224			300.319	2.47537		304.9	-4.35694e-05
			4.3224			300.551	2.47536		305.13	-3.48555e-05
			4.3224			300.78	2.47535		305.361	-4.35694e-05
			4.3224			301.011	2.47535		305.592	-1.30708e-05
			4.3224			301.242	2.47534		305.823	3.48555e-05
			4.3224			301.473	2.47534		306.055	5.22833e-05
			4.3224			301.704	2.47534		306.288	1.30708e-05
			4.3224			301.935	2.47534		306.521	3.48555e-05
			4.3224			302.167	2.47534		306.748	-4.35694e-06
			4.3224			302.397	2.47534		306.979	-2.61416e-05
			4.3224			302.628	2.47531		307.21	-2.61416e-05
			4.3224			302.859	2.47532		307.441	-2.17847e-05
			4.3224			303.09	2.47531		307.672	-2.61416e-05
			4.3224			303.321	2.4753		307.903	-3.04986e-05
			4.3224			303.552	2.4753		308.136	-3.04986e-05
			4.3224			303.784	2.4753		308.368	-3.04986e-05
			4.3224			304.012	2.4753		308.596	-3.48555e-05
			4.3224			304.243	2.47529		308.827	-3.48555e-05
			4.3224			304.475	2.47528		309.058	-3.48555e-05
			4.3224			304.705	2.47528		309.289	-3.04986e-05
			4.3224			304.937	2.47528		309.52	-2.61416e-05
			4.3224			305.168	2.47527		309.751	-4.35694e-05
			4.3224			305.33	2.47527		309.986	-3.92124e-05
			4.3224			305.541	2.47527		310.212	-3.48555e-05
			4.3224			305.758	2.47527		310.444	-3.04986e-05
			4.3224			305.989	2.47527		310.675	-2.61416e-05
			4.3224			306.221	2.47526		310.906	-3.04986e-05
			4.3224			306.451	2.47526		311.137	-3.92124e-05
			4.3224			306.683	2.47525		311.367	-3.92124e-05
			4.3224			306.914	2.47524		311.6	-4.35694e-05
			4.3224			307.144	2.47524		311.83	-3.48555e-05
			4.3224			307.375	2.47523		312.061	-4.35694e-05
			4.3224			307.606	2.47523		312.292	-2.61416e-05
			4.3224			307.837	2.47524		312.523	-3.48555e-05
			4.3224			308.069	2.47523		312.754	-6.9711e-05
			4.3224			308.302	2.47523		312.985	-7.40679e-05
			4.3224			308.53	2.47522		313.216	-2.61416e-05
			4.3224			308.761	2.47523		313.447	-5.22833e-05
			4.3224			308.992	2.47524		313.678	-4.79263e-05
			4.3224			309.223	2.47522		313.909	-2.61416e-05
			4.3224			309.454	2.47522		314.14	-2.17847e-05
			4.3224			309.686	2.47522		314.37	-1.30708e-05
			4.3224			309.916	2.47523		314.602	-4.35694e-06
			4.3224			310.077	2.47522		314.833	-4.79263e-05
			4.3224			310.289	2.47521		314.995	-3.04986e-05
			4.3224			310.506	2.4752		315.207	-2.61416e-05
			4.3224			310.737	2.47521		315.387	-1.74278e-05
			4.3224			310.968	2.4752		315.598	-1.74278e-05
			4.3224			311.202	2.4752		315.81	-1.74278e-05
			4.3224			311.43	2.47521		316.022	-1.74278e-05
			4.3224			311.662	2.47521		316.242	-2.17847e-05
			4.3224			311.892	2.47522		316.473	-2.17847e-05
			4.3224			312.123	2.47524		316.704	-2.17847e-05
			4.3224			312.354	2.47523		316.935	-1.30708e-05
			4.3224			312.535	2.47523		317.167	-8.71388e-06
			4.3224			312.746	2.47522		317.398	-1.74278e-05
			4.3224			312.958	2.47523		317.629	-1.74278e-05
			4.3224			313.175	2.47522		317.859	-1.74278e-05
			4.3224			313.339	2.47522		318.091	-2.17847e-05
			4.3224			313.552	2.47523		318.322	-1.30708e-05
			4.3224			313.766	2.47521		318.552	-1.74278e-05
			4.3224			313.996	2.47524		318.783	-1.74278e-05
			4.3224			314.227	2.47523		318.947	-1.74278e-05
			4.3224			314.458	2.47524		319.107	-2.17847e-05
			4.3224			314.689	2.47525		319.318	-1.74278e-05
			4.3224			314.92	2.47525		319.53	-2.17847e-05
			4.3224			315.152	2.47525		319.742	-2.61416e-05
			4.3224			315.382	2.47525		319.963	-2.61416e-05
			4.3224			315.613	2.47525		320.194	-2.61416e-05
			4.3224			315.844	2.47525		320.425	-2.17847e-05
			4.3224			316.075	2.47526		320.656	-1.74278e-05
			4.3224			316.306	2.47525		320.821	-1.30708e-05
			4.3224			316.537	2.47526		321.032	-4.35694e-06
			4.3224			316.768	2.47526		321.246	0
			4.3224			317	2.47525		321.477	0
			4.3224			317.23	2.47525		321.708	0
			4.3224			317.461	2.47526		321.939	-3.04986e-05
			4.3224			317.692	2.47526		322.17	-2.17847e-05
			4.3224			317.923	2.47526		322.401	-1.74278e-05
			4.3224			318.154	2.47526		322.564	-2.17847e-05
			4.3224			318.385	2.47525		322.775	-1.74278e-05
			4.3224			318.616	2.47526		322.991	-4.35694e-06
			4.3224			318.847	2.47526		323.222	-1.30708e-05
			4.3224			319.078	2.47525		323.453	-4.35694e-06
			4.3224			319.31	2.47526		323.684	-8.71388e-06
			4.3224			319.54	2.47526		323.916	8.71388e-06
			4.3224			319.771	2.47527		324.147	1.30708e-05
			4.3224			320.002	2.47527		324.378	8.71388e-06
			4.3224			320.233	2.47527		324.609	4.35694e-06
			4.3224			320.394	2.47527		324.841	4.35694e-06
			4.3224			320.606	2.47528		325.071	1.30708e-05
			4.3224			320.824	2.47529		325.302	1.30708e-05
			4.3224			321.055	2.47529		325.533	-4.35694e-06
			4.3224			321.286	2.47529		325.765	-4.35694e-06
			4.3224			321.518	2.47528		325.995	4.35694e-06
			4.3224			321.748	2.47527		326.226	1.30708e-05
			4.3224			321.979	2.47527		326.457	-2.17847e-05
			4.3224			322.21	2.47527		326.688	-1.30708e-05
			4.3224			322.374	2.47527		326.919	-8.71388e-06
			4.3224			322.585	2.47527		327.092	-4.35694e-06
			4.3224			322.8	2.47528		327.303	-4.35694e-06
			4.3224			323.031	2.47529		327.517	0
			4.3224			323.262	2.47529		327.74	-1.74278e-05
			4.3224			323.493	2.47529		327.906	-1.30708e-05
			4.3224			323.724	2.47528		328.117	-8.71388e-06
			4.3224			323.955	2.47527		328.33	-1.30708e-05
			4.3224			324.185	2.47527		328.56	-1.30708e-05
			4.3224			324.417	2.47528		328.791	-4.35694e-06
			4.3224			324.651	2.47528		329.022	-1.30708e-05
			4.3224			324.879	2.47528		329.253	-1.30708e-05
			4.3224			325.11	2.47529		329.484	-8.71388e-06
			4.3224			325.341	2.47529		329.656	-8.71388e-06
			4.3224			325.572	2.47529		329.868	-1.30708e-05
			4.3224			325.803	2.47529		330.078	-8.71388e-06
			4.3224			326.036	2.47528		330.304	-1.74278e-05
			4.3224			326.265	2.47528		330.535	-2.61416e-05
			4.3224			326.495	2.47529		330.766	-8.71388e-06
			4.3224			326.727	2.47528		330.998	7.84249e-05
			4.3224			326.958	2.47528		331.228	9.58526e-05
			4.3224			327.189	2.47528		331.459	9.58526e-05
			4.3224			327.42	2.47528		331.69	0.000108923
			4.3224			327.651	2.47529		331.921	0.000108923
			4.3224			327.882	2.47529		332.152	0.000117637
			4.3224			328.113	2.47529		332.384	0.000117637
			4.3224			328.344	2.47529		332.614	0.000108923
			4.3224			328.574	2.47528		332.846	0.000104567
			4.3224			328.806	2.47528		333.076	0.000121994
			4.3224			329.037	2.47529		333.307	3.92124e-05
			4.3224			329.199	2.4753		333.538	4.35694e-06
			4.3224			329.411	2.4753		333.769	1.30708e-05
			4.3224			329.627	2.4753		334.001	0
			4.3224			329.858	2.47531		334.231	1.74278e-05
			4.3224			330.089	2.47531		334.462	6.09971e-05
			4.3224			330.321	2.47531		334.693	8.71388e-06
			4.3224			330.555	2.47531		334.924	0
			4.3224			330.783	2.47533		335.086	0
			4.3224			331.014	2.47532		335.298	0
			4.3224			331.245	2.47533		335.516	1.74278e-05
			4.3224			331.476	2.47534		335.745	1.30708e-05
			4.3224			331.707	2.47534		335.976	-1.74278e-05
			4.3224			331.938	2.47534		336.207	-1.74278e-05
			4.3224			332.169	2.47534		336.438	-2.17847e-05
			4.3224			332.4	2.47535		336.669	-2.17847e-05
			4.3224			332.63	2.47535		336.902	-1.30708e-05
			4.3224			332.862	2.47535		337.131	-8.71388e-06
			4.3224			333.093	2.47537		337.362	-4.35694e-06
			4.3224			333.324	2.47536		337.593	0
			4.3224			333.555	2.47537		337.824	5.66402e-05
			4.3224			333.786	2.47537		338.055	0.000117637
			4.3224			334.017	2.47537		338.286	9.14957e-05
			4.3224			334.248	2.47538		338.518	9.58526e-05
			4.3224			334.479	2.47538		338.699	0.000104567
			4.3224			334.709	2.47538		338.91	0.000104567
			4.3224			334.941	2.47539		339.119	0.000117637
			4.3224			335.172	2.47539		339.337	0.000108923
			4.3224			335.402	2.47539		339.568	0.00010021
			4.3224			335.634	2.4754		339.8	0.00010021
			4.3224			335.864	2.4754		340.03	0.00010021
			4.3224			336.095	2.47539		340.261	8.71388e-05
			4.3224			336.326	2.47538		340.492	8.27818e-05
			4.3224			336.491	2.47539		340.723	8.27818e-05
			4.3224			336.702	2.4754		340.954	-1.30708e-05
			4.3224			336.868	2.47538		341.188	-8.71388e-06
			4.3224			337.08	2.47538		341.417	-1.74278e-05
			4.3224			337.292	2.47538		341.648	-2.61416e-05
			4.3224			337.505	2.47538		341.879	-2.61416e-05
			4.3224			337.736	2.47538		342.109	-1.74278e-05
			4.3224			337.97	2.47537		342.341	-2.17847e-05
			4.3224			338.202	2.47536		342.572	-3.04986e-05
			4.3224			338.429	2.47537		342.803	-2.17847e-05
			4.3224			338.66	2.47537		343.034	-3.04986e-05
			4.3224			338.891	2.47537		343.268	-2.17847e-05
			4.3224						343.496	-2.17847e-05
			4.3224						343.727	-4.35694e-06
			4.3224						343.957	-1.30708e-05
			4.3224						344.133	-1.74278e-05
			4.3224						344.345	-1.74278e-05
			4.3224						344.556	0
			4.3224
